# Supplementary material for: Hunter selection for larger and older male bobcats affects annual harvest demography
Source: R Soc Open Sci. 2018 Oct 10;5(10):180668. doi: 10.1098/rsos.180668 (PMC6227987; doi:10.1098/rsos.180668)
Supplement: Data [file rsos180668supp1.csv]

X ID	Y ID	Year	Yr	Yr2	DOK	County	Unit	Zone	MF	Sex	Age	Age0.5	Placental Scars	WEIGHTlbs	Weight	trap	Method	Methods	Method3	Index	Population
1	1	1983	1	1	NA	Washburn	NA	Northern	Male	1	4.5	4		22.2	10.1		0	Trapped	Trapped		2031
2	2	1983	1	1	NA	Washburn	NA	Northern	Female	0	3.5	3	2	14.6	6.6		0	Trapped	Trapped		2031
3	3	1983	1	1	NA	Washburn	NA	Northern	Female	0	1.5	1	0				NA	NA	NA		2031
4	4	1983	1	1	NA	Taylor	NA	Northern	Male	1	3.5	3					NA	NA	NA		2031
5	5	1983	1	1	NA	Taylor	NA	Northern	Male	1	0.5	0					NA	NA	NA		2031
6	6	1983	1	1	NA	Taylor	NA	Northern	Male	1	0.5	0					NA	NA	NA		2031
7	7	1983	1	1	NA	Sawyer	NA	Northern	Female	0	5.5	5	1				NA	NA	NA		2031
8	8	1983	1	1	NA	Sawyer	NA	Northern	Male	1	4.5	4		28.9	13.1		NA	NA	NA		2031
9	9	1983	1	1	NA	Sawyer	NA	Northern	Male	1	4.5	4					NA	NA	NA		2031
10	10	1983	1	1	NA	Sawyer	NA	Northern	Female	0	3.5	3	3	14.6	6.6		0	Trapped	Trapped		2031
11	11	1983	1	1	NA	Sawyer	NA	Northern	Female	0	3.5	3	1	10.2	4.6		0	Trapped	Trapped		2031
12	12	1983	1	1	NA	Sawyer	NA	Northern	Male	1	2.5	2		24.4	11.1		NA	NA	Other		2031
13	13	1983	1	1	NA	Sawyer	NA	Northern	Male	1	1.5	1		14.5	6.6		NA	NA	Other		2031
14	14	1983	1	1	NA	Sawyer	NA	Northern	Male	1	1.5	1		24.4	11.1		1	Dogs	Dogs		2031
15	15	1983	1	1	NA	Sawyer	NA	Northern	Female	0	1.5	1	3	15.2	6.9		0	Trapped	Trapped		2031
16	16	1983	1	1	NA	Sawyer	NA	Northern	Female	0	1.5	1	0				0	Trapped	Trapped		2031
17	17	1983	1	1	NA	Rusk	NA	Northern	Male	1	6.5	6		30.6	13.9		1	Dogs	Dogs		2031
18	18	1983	1	1	NA	Rusk	NA	Northern	Female	0	6.5	6	2	18.7	8.5		1	Dogs	Dogs		2031
19	19	1983	1	1	NA	Rusk	NA	Northern	Female	0	3.5	3	4	19.6	8.9		1	Dogs	Dogs		2031
20	20	1983	1	1	NA	Rusk	NA	Northern	Female	0	1.5	1	0				1	Dogs	Dogs		2031
21	21	1983	1	1	NA	Rusk	NA	Northern	Female	0	1.5	1	0	15.7	7.1		1	Dogs	Dogs		2031
22	22	1983	1	1	NA	Rusk	NA	Northern	Female	0	1.5	1	0	16.7	7.6		1	Dogs	Dogs		2031
23	23	1983	1	1	NA	Rusk	NA	Northern	Female	0	0.5	0	0				1	Dogs	Dogs		2031
24	24	1983	1	1	NA	Rusk	NA	Northern	Female	0	0.5	0	0	7.9	3.6		0	Trapped	Trapped		2031
25	25	1983	1	1	NA	Rusk	NA	Northern	Male	1	NA	NA		29.2	13.2		1	Dogs	Dogs		2031
26	26	1983	1	1	NA	Price	NA	Northern	Male	1	9.5	9		19.3	8.8		0	Trapped	Trapped		2031
27	27	1983	1	1	NA	Price	NA	Northern	Female	0	4.5	4	2	15.2	6.9		0	Trapped	Trapped		2031
28	28	1983	1	1	NA	Price	NA	Northern	Male	1	3.5	3		23.1	10.5		1	Dogs	Dogs		2031
29	29	1983	1	1	NA	Price	NA	Northern	Female	0	2.5	2	2	11.1	5		0	Trapped	Trapped		2031
30	30	1983	1	1	NA	Price	NA	Northern	Female	0	2.5	2	0	10.3	4.7		1	Dogs	Dogs		2031
31	31	1983	1	1	NA	Price	NA	Northern	Male	1	1.5	1		20.7	9.4		1	Dogs	Dogs		2031
32	32	1983	1	1	NA	Price	NA	Northern	Female	0	1.5	1	0	14.4	6.5		0	Trapped	Trapped		2031
33	33	1983	1	1	NA	Price	NA	Northern	Male	1	0.5	0		4.5	2		0	Trapped	Trapped		2031
34	34	1983	1	1	NA	Price	NA	Northern	Female	0	0.5	0	0	7.4	3.4		0	Trapped	Trapped		2031
35	35	1983	1	1	NA	Oneida	NA	Northern	Male	1	0.5	0		8.5	3.9		NA	NA	NA		2031
36	36	1983	1	1	NA	Oconto	NA	Northern	Male	1	1.5	1		16.5	7.5		1	Dogs	Dogs		2031
37	37	1983	1	1	NA	Oconto	NA	Northern	Female	0	1.5	1	0	16.6	7.5		1	Dogs	Dogs		2031
38	38	1983	1	1	NA	Oconto	NA	Northern	Female	0	NA	NA					NA	NA	NA		2031
39	39	1983	1	1	NA	Oconto	NA	Northern	Female	0	2.5	2	0	14.3	6.5		1	Dogs	Dogs		2031
40	40	1983	1	1	NA	Marinette	NA	Northern	Female	0	7.5	7	0	14.1	6.4		0	Trapped	Trapped		2031
41	41	1983	1	1	NA	Marinette	NA	Northern	Male	1	3.5	3		29.8	13.5		1	Dogs	Dogs		2031
42	42	1983	1	1	NA	Marinette	NA	Northern	Male	1	NA	NA					0	Trapped	Trapped		2031
43	43	1983	1	1	NA	Marinette	NA	Northern	Female	0	NA	NA	0				0	Trapped	Trapped		2031
44	44	1983	1	1	NA	Price	NA	Northern	Male	1	0.5	0		9.7	4.4		1	Dogs	Dogs		2031
45	45	1983	1	1	NA	Price	NA	Northern	Female	0	2.5	2	2	13.9	6.3		1	Dogs	Dogs		2031
46	46	1983	1	1	NA	Lincoln	NA	Northern	Female	0	2.5	2	0	16.2	7.3		0	Trapped	Trapped		2031
47	47	1983	1	1	NA	Lincoln	NA	Northern	Male	1	1.5	1					1	Dogs	Dogs		2031
48	48	1983	1	1	NA	Lincoln	NA	Northern	Male	1	1.5	1		14.4	6.5		0	Trapped	Trapped		2031
49	49	1983	1	1	NA	Lincoln	NA	Northern	Female	0	1.5	1	1				0	Trapped	Trapped		2031
50	50	1983	1	1	NA	Lincoln	NA	Northern	Male	1	0.5	0					NA	NA	Other		2031
51	51	1983	1	1	NA	Lincoln	NA	Northern	Male	1	NA	NA		28.6	13		NA	NA	Other		2031
52	52	1983	1	1	NA	Lincoln	NA	Northern	Female	0	NA	NA					1	Dogs	Dogs		2031
53	53	1983	1	1	NA	Langlade	NA	Northern	Male	1	2.5	2					0	Trapped	Trapped		2031
54	54	1983	1	1	NA	Rusk	NA	Northern	Female	0	1.5	1	0	16.8	7.6		1	Dogs	Dogs		2031
55	55	1983	1	1	NA	Langlade	NA	Northern	Female	0	2.5	2	3	19.1	8.7		0	Trapped	Trapped		2031
56	56	1983	1	1	NA	Langlade	NA	Northern	Male	1	1.5	1		20.5	9.3		0	Trapped	Trapped		2031
57	57	1983	1	1	NA	Langlade	NA	Northern	Female	0	1.5	1	2	14.1	6.4		0	Trapped	Trapped		2031
58	58	1983	1	1	NA	Langlade	NA	Northern	Male	1	0.5	0		10.5	4.8		0	Trapped	Trapped		2031
59	59	1983	1	1	NA	Rusk	NA	Northern	Male	1	1.5	1					1	Dogs	Dogs		2031
60	60	1983	1	1	NA	Langlade	NA	Northern	Male	1	0.5	0		10.7	4.9		1	Dogs	Dogs		2031
61	61	1983	1	1	NA	Langlade	NA	Northern	Male	1	NA	NA					1	Dogs	Dogs		2031
62	62	1983	1	1	NA	Forest	NA	Northern	Female	0	13.5	13	2				0	Trapped	Trapped		2031
63	63	1983	1	1	NA	Forest	NA	Northern	Male	1	5.5	5		27.2	12.3		1	Dogs	Dogs		2031
64	64	1983	1	1	NA	Sawyer	NA	Northern	Male	1	0.5	0					0	Trapped	Trapped		2031
65	65	1983	1	1	NA	Forest	NA	Northern	Female	0	3.5	3	2	10.5	4.8		0	Trapped	Trapped		2031
66	66	1983	1	1	NA	Forest	NA	Northern	Male	1	2.5	2		28.5	12.9		1	Dogs	Dogs		2031
67	67	1983	1	1	NA	Forest	NA	Northern	Female	0	1.5	1	0	14.8	6.7		1	Dogs	Dogs		2031
68	68	1983	1	1	NA	Forest	NA	Northern	Male	1	0.5	0		9.5	4.3		0	Trapped	Trapped		2031
69	69	1983	1	1	NA	Sawyer	NA	Northern	Male	1	3.5	3		21.6	9.8		0	Trapped	Trapped		2031
70	70	1983	1	1	NA	Florence	NA	Northern	Female	0	1.5	1					0	Trapped	Trapped		2031
71	71	1983	1	1	NA	Douglas	NA	Northern	Female	0	9.5	9	1	22.6	10.3		1	Dogs	Dogs		2031
72	72	1983	1	1	NA	Douglas	NA	Northern	Female	0	1.5	1	0	13.2	6		1	Dogs	Dogs		2031
73	73	1983	1	1	NA	Douglas	NA	Northern	Female	0	1.5	1	0	14.8	6.7		0	Trapped	Trapped		2031
74	74	1983	1	1	NA	Sawyer	NA	Northern	Male	1	5.5	5					NA	NA	NA		2031
75	75	1983	1	1	NA	Douglas	NA	Northern	Male	1	0.5	0		10.1	4.6		0	Trapped	Trapped		2031
76	76	1983	1	1	NA	Burnett	NA	Northern	Female	0	4.5	4	2	13.6	6.2		0	Trapped	Trapped		2031
77	77	1983	1	1	NA	Burnett	NA	Northern	Female	0	2.5	2	3				1	Dogs	Dogs		2031
78	78	1983	1	1	NA	Burnett	NA	Northern	Male	1	1.5	1		9.8	4.4		0	Trapped	Trapped		2031
79	79	1983	1	1	NA	Burnett	NA	Northern	Female	0	1.5	1	0	15.5	7		1	Dogs	Dogs		2031
80	80	1983	1	1	NA	Burnett	NA	Northern	Male	1	0.5	0		7.3	3.3		0	Trapped	Trapped		2031
81	81	1983	1	1	NA	Bayfield	NA	Northern	Female	0	3.5	3	0	17.8	8.1		0	Trapped	Trapped		2031
82	82	1983	1	1	NA	Bayfield	NA	Northern	Male	1	2.5	2					0	Trapped	Trapped		2031
83	83	1983	1	1	NA	Washburn	NA	Northern	Female	0	0.5	0	0				NA	NA	NA		2031
84	84	1983	1	1	NA	Ashland	NA	Northern	Male	1	3.5	3		25.3	11.5		0	Trapped	Trapped		2031
85	85	1983	1	1	NA	Ashland	NA	Northern	Female	0	2.5	2	6	19.7	8.9		0	Trapped	Trapped		2031
86	86	1983	1	1	NA	Ashland	NA	Northern	Male	1	0.5	0		7.4	3.4		0	Trapped	Trapped		2031
87	87	1983	1	1	NA	Ashland	NA	Northern	Male	1	0.5	0		7.8	3.5		1	Dogs	Dogs		2031
88	88	1983	1	1	NA	Unknown	NA	Northern	Female	0	7.5	7	1	21.5	9.8		NA	NA	NA		2031
89	89	1983	1	1	NA	Unknown	NA	Northern	Female	0	1.5	1	3				NA	NA	NA		2031
90	90	1983	1	1	NA	Unknown	NA	Northern	Female	0	0.5	0	0	4.4	2		NA	NA	NA		2031
91	91	1983	1	1	NA	Unknown	NA	Northern	Female	0	0.5	0	0	6.4	2.9		NA	NA	NA		2031
92	92	1983	1	1	NA	Unknown	NA	Northern	Male	1	NA	NA					NA	NA	NA		2031
93	93	1984	2	4	NA	Washburn	NA	Northern	Male	1	3.5	3		22.7	10.3		0	Trapped	Trapped		1800
94	94	1984	2	4	NA	Washburn	NA	Northern	Female	0	2.5	2	0	16.8	7.6		0	Trapped	Trapped		1800
95	95	1984	2	4	NA	Washburn	NA	Northern	Male	1	1.5	1					1	Dogs	Dogs		1800
96	96	1984	2	4	NA	Vilas	NA	Northern	Female	0	4.5	4	0	13.8	6.3		NA	NA	Other		1800
97	97	1984	2	4	NA	Vilas	NA	Northern	Male	1	0.5	0		17.5	7.9		1	Dogs	Dogs		1800
98	98	1984	2	4	NA	Taylor	NA	Northern	Female	0	2.5	2	0	13.7	6.2		0	Trapped	Trapped		1800
99	99	1984	2	4	NA	Taylor	NA	Northern	Male	1	1.5	1		23.7	10.8		1	Dogs	Dogs		1800
100	100	1984	2	4	NA	Taylor	NA	Northern	Male	1	NA	NA		30.6	13.9		1	Dogs	Dogs		1800
101	101	1984	2	4	NA	Sawyer	NA	Northern	Female	0	5.5	5	0	19.4	8.8		1	Dogs	Dogs		1800
102	102	1984	2	4	NA	Sawyer	NA	Northern	Male	1	4.5	4		30.4	13.8		1	Dogs	Dogs		1800
103	103	1984	2	4	NA	Sawyer	NA	Northern	Male	1	3.5	3					1	Dogs	Dogs		1800
104	104	1984	2	4	NA	Sawyer	NA	Northern	Female	0	3.5	3	3	19.6	8.9		1	Dogs	Dogs		1800
105	105	1984	2	4	NA	Sawyer	NA	Northern	Female	0	3.5	3	1	15.8	7.2		1	Dogs	Dogs		1800
106	106	1984	2	4	NA	Sawyer	NA	Northern	Female	0	NA	NA	2				1	Dogs	Dogs		1800
107	107	1984	2	4	NA	Rusk	NA	Northern	Male	1	5.5	5		26.4	12		0	Trapped	Trapped		1800
108	108	1984	2	4	NA	Rusk	NA	Northern	Male	1	4.5	4					1	Dogs	Dogs		1800
109	109	1984	2	4	NA	Rusk	NA	Northern	Female	0	4.5	4	3	13.1	5.9		1	Dogs	Dogs		1800
110	110	1984	2	4	NA	Rusk	NA	Northern	Female	0	4.5	4	4				1	Dogs	Dogs		1800
111	111	1984	2	4	NA	Rusk	NA	Northern	Male	1	3.5	3					0	Trapped	Trapped		1800
112	112	1984	2	4	NA	Rusk	NA	Northern	Male	1	3.5	3		27.6	12.5		1	Dogs	Dogs		1800
113	113	1984	2	4	NA	Rusk	NA	Northern	Male	1	1.5	1		25.2	11.4		1	Dogs	Dogs		1800
114	114	1984	2	4	NA	Rusk	NA	Northern	Male	1	0.5	0		10.3	4.7		1	Dogs	Dogs		1800
115	115	1984	2	4	NA	Rusk	NA	Northern	Female	0	0.5	0	0	8.4	3.8		1	Dogs	Dogs		1800
116	116	1984	2	4	NA	Rusk	NA	Northern	Female	0	NA	NA	0	8.8	4		0	Trapped	Trapped		1800
117	117	1984	2	4	NA	Price	NA	Northern	Male	1	4.5	4					1	Dogs	Dogs		1800
118	118	1984	2	4	NA	Price	NA	Northern	Male	1	4.5	4					1	Dogs	Dogs		1800
119	119	1984	2	4	NA	Price	NA	Northern	Male	1	4.5	4					0	Trapped	Trapped		1800
120	120	1984	2	4	NA	Price	NA	Northern	Female	0	4.5	4					0	Trapped	Trapped		1800
121	121	1984	2	4	NA	Price	NA	Northern	Female	0	4.5	4		17.5	7.9		1	Dogs	Dogs		1800
122	122	1984	2	4	NA	Price	NA	Northern	Male	1	2.5	2		23.5	10.7		1	Dogs	Dogs		1800
123	123	1984	2	4	NA	Price	NA	Northern	Female	0	2.5	2	2	18.5	8.4		1	Dogs	Dogs		1800
124	124	1984	2	4	NA	Price	NA	Northern	Female	0	2.5	2		15.8	7.2		NA	NA	NA		1800
125	125	1984	2	4	NA	Price	NA	Northern	Male	1	1.5	1					NA	NA	Other		1800
126	126	1984	2	4	NA	Price	NA	Northern	Female	0	1.5	1	0	15.2	6.9		0	Trapped	Trapped		1800
127	127	1984	2	4	NA	Price	NA	Northern	Female	0	1.5	1	0	19.5	8.8		NA	NA	NA		1800
128	128	1984	2	4	NA	Price	NA	Northern	Female	0	0.5	0					1	Dogs	Dogs		1800
129	129	1984	2	4	NA	Price	NA	Northern	Female	0	NA	NA	0				0	Trapped	Trapped		1800
130	130	1984	2	4	NA	Oneida	NA	Northern	Male	1	4.5	4		23.8	10.8		1	Dogs	Dogs		1800
131	131	1984	2	4	NA	Oneida	NA	Northern	Female	0	2.5	2	1	20.8	9.4		0	Trapped	Trapped		1800
132	132	1984	2	4	NA	Oneida	NA	Northern	Male	1	1.5	1					1	Dogs	Dogs		1800
133	133	1984	2	4	NA	Oneida	NA	Northern	Male	1	0.5	0		7.7	3.5		0	Trapped	Trapped		1800
134	134	1984	2	4	NA	Oneida	NA	Northern	Female	0	0.5	0	0	8.8	4		1	Dogs	Dogs		1800
135	135	1984	2	4	NA	Oconto	NA	Northern	Male	1	0.5	0		13.9	6.3		1	Dogs	Dogs		1800
136	136	1984	2	4	NA	Marinette	NA	Northern	Female	0	7.5	7	4				0	Trapped	Trapped		1800
137	137	1984	2	4	NA	Marinette	NA	Northern	Female	0	3.5	3	2	14.8	6.7		0	Trapped	Trapped		1800
138	138	1984	2	4	NA	Marinette	NA	Northern	Male	1	1.5	1		27.3	12.4		0	Trapped	Trapped		1800
139	139	1984	2	4	NA	Marinette	NA	Northern	Female	0	0.5	0	0	9.3	4.2		NA	NA	Other		1800
140	140	1984	2	4	NA	Marinette	NA	Northern	Male	1	NA	NA					0	Trapped	Trapped		1800
141	141	1984	2	4	NA	Marinette	NA	Northern	Female	0	NA	NA	0				NA	NA	Other		1800
142	142	1984	2	4	NA	Lincoln	NA	Northern	Male	1	5.5	5		30.2	13.7		1	Dogs	Dogs		1800
143	143	1984	2	4	NA	Lincoln	NA	Northern	Male	1	3.5	3		24.8	11.2		0	Trapped	Trapped		1800
144	144	1984	2	4	NA	Lincoln	NA	Northern	Male	1	1.5	1					1	Dogs	Dogs		1800
145	145	1984	2	4	NA	Lincoln	NA	Northern	Male	1	NA	NA					1	Dogs	Dogs		1800
146	146	1984	2	4	NA	Langlade	NA	Northern	Male	1	5.5	5		26.5	12		1	Dogs	Dogs		1800
147	147	1984	2	4	NA	Langlade	NA	Northern	Male	1	3.5	3					1	Dogs	Dogs		1800
148	148	1984	2	4	NA	Price	NA	Northern	Male	1	NA	NA		31.2	14.2		1	Dogs	Dogs		1800
149	149	1984	2	4	NA	Langlade	NA	Northern	Male	1	1.5	1		28.5	12.9		1	Dogs	Dogs		1800
150	150	1984	2	4	NA	Langlade	NA	Northern	Male	1	1.5	1		29.5	13.4		1	Dogs	Dogs		1800
151	151	1984	2	4	NA	Langlade	NA	Northern	Female	0	1.5	1		23.8	10.8		1	Dogs	Dogs		1800
152	152	1984	2	4	NA	Langlade	NA	Northern	Female	0	1.5	1	0	12.2	5.5		0	Trapped	Trapped		1800
153	153	1984	2	4	NA	Price	NA	Northern	Male	1	1.5	1		23.8	10.8		1	Dogs	Dogs		1800
154	154	1984	2	4	NA	Langlade	NA	Northern	Female	0	1.5	1	3	17.4	7.9		1	Dogs	Dogs		1800
155	155	1984	2	4	NA	Langlade	NA	Northern	Female	0	1.5	1	0	18.3	8.3		1	Dogs	Dogs		1800
156	156	1984	2	4	NA	Langlade	NA	Northern	Male	1	0.5	0					NA	NA	Other		1800
157	157	1984	2	4	NA	Langlade	NA	Northern	Male	1	NA	NA		24.5	11.1		0	Trapped	Trapped		1800
158	158	1984	2	4	NA	Langlade	NA	Northern	Female	0	NA	NA	0	12.3	5.6		NA	NA	Other		1800
159	159	1984	2	4	NA	Iron	NA	Northern	Female	0	9.5	9	3	17.5	7.9		1	Dogs	Dogs		1800
160	160	1984	2	4	NA	Price	NA	Northern	Male	1	4.5	4		17.8	8.1		1	Dogs	Dogs		1800
161	161	1984	2	4	NA	Iron	NA	Northern	Male	1	2.5	2		19.8	9		0	Trapped	Trapped		1800
162	162	1984	2	4	NA	Iron	NA	Northern	Female	0	NA	NA	0	9.5	4.3		0	Trapped	Trapped		1800
163	163	1984	2	4	NA	Rusk	NA	Northern	Female	0	0.5	0	0	11.8	5.4		1	Dogs	Dogs		1800
164	164	1984	2	4	NA	Forest	NA	Northern	Female	0	5.5	5	0	13.3	6		1	Dogs	Dogs		1800
165	165	1984	2	4	NA	Forest	NA	Northern	Female	0	3.5	3	3	20.5	9.3		1	Dogs	Dogs		1800
166	166	1984	2	4	NA	Forest	NA	Northern	Male	1	2.5	2		22.8	10.3		1	Dogs	Dogs		1800
167	167	1984	2	4	NA	Forest	NA	Northern	Male	1	1.5	1		21.5	9.8		1	Dogs	Dogs		1800
168	168	1984	2	4	NA	Rusk	NA	Northern	Male	1	2.5	2					1	Dogs	Dogs		1800
169	169	1984	2	4	NA	Forest	NA	Northern	Male	1	1.5	1		24.5	11.1		1	Dogs	Dogs		1800
170	170	1984	2	4	NA	Forest	NA	Northern	Male	1	1.5	1		29.6	13.4		1	Dogs	Dogs		1800
171	171	1984	2	4	NA	Forest	NA	Northern	Female	0	1.5	1	0	15.5	7		1	Dogs	Dogs		1800
172	172	1984	2	4	NA	Forest	NA	Northern	Male	1	0.5	0		10.2	4.6		1	Dogs	Dogs		1800
173	173	1984	2	4	NA	Florence	NA	Northern	Male	1	0.5	0		8.2	3.7		NA	NA	Other		1800
174	174	1984	2	4	NA	Florence	NA	Northern	Female	0	0.5	0	0				0	Trapped	Trapped		1800
175	175	1984	2	4	NA	Douglas	NA	Northern	Female	0	5.5	5	0	21.8	9.9		0	Trapped	Trapped		1800
176	176	1984	2	4	NA	Douglas	NA	Northern	Male	1	1.5	1		18.6	8.4		1	Dogs	Dogs		1800
177	177	1984	2	4	NA	Sawyer	NA	Northern	Female	0	1.5	1	0	9.3	4.2		NA	NA	Other		1800
178	178	1984	2	4	NA	Douglas	NA	Northern	Male	1	1.5	1		24.7	11.2		1	Dogs	Dogs		1800
179	179	1984	2	4	NA	Douglas	NA	Northern	Female	0	1.5	1	0	15.5	7		NA	NA	Other		1800
180	180	1984	2	4	NA	Sawyer	NA	Northern	Male	1	3.5	3		27.8	12.6		1	Dogs	Dogs		1800
181	181	1984	2	4	NA	Douglas	NA	Northern	Female	0	0.5	0	0	6.2	2.8		0	Trapped	Trapped		1800
182	182	1984	2	4	NA	Douglas	NA	Northern	Female	0	0.5	0	0	7.6	3.4		1	Dogs	Dogs		1800
183	183	1984	2	4	NA	Taylor	NA	Northern	Female	0	0.5	0	0	12.7	5.8		1	Dogs	Dogs		1800
184	184	1984	2	4	NA	Douglas	NA	Northern	Female	0	0.5	0	0	10.6	4.8		1	Dogs	Dogs		1800
185	185	1984	2	4	NA	Chippewa	NA	Northern	Female	0	3.5	3	0	16.8	7.6		1	Dogs	Dogs		1800
186	186	1984	2	4	NA	Burnett	NA	Northern	Male	1	7.5	7		22.7	10.3		1	Dogs	Dogs		1800
187	187	1984	2	4	NA	Burnett	NA	Northern	Female	0	3.5	3		14.4	6.5		1	Dogs	Dogs		1800
188	188	1984	2	4	NA	Burnett	NA	Northern	Male	1	2.5	2		22.6	10.3		1	Dogs	Dogs		1800
189	189	1984	2	4	NA	Burnett	NA	Northern	Female	0	1.5	1	0	12.7	5.8		1	Dogs	Dogs		1800
190	190	1984	2	4	NA	Burnett	NA	Northern	Male	1	0.5	0		10.2	4.6		1	Dogs	Dogs		1800
191	191	1984	2	4	NA	Burnett	NA	Northern	Male	1	0.5	0		10.2	4.6		1	Dogs	Dogs		1800
192	192	1984	2	4	NA	Burnett	NA	Northern	Male	1	0.5	0		10.7	4.9		1	Dogs	Dogs		1800
193	193	1984	2	4	NA	Burnett	NA	Northern	Female	0	0.5	0	0	7.3	3.3		1	Dogs	Dogs		1800
194	194	1984	2	4	NA	Burnett	NA	Northern	Female	0	0.5	0	0	8.8	4		NA	NA	Other		1800
195	195	1984	2	4	NA	Barron	NA	Northern	Male	1	0.5	0		11.6	5.3		1	Dogs	Dogs		1800
196	196	1984	2	4	NA	Barron	NA	Northern	Male	1	0.5	0		14.5	6.6		1	Dogs	Dogs		1800
197	197	1984	2	4	NA	Unknown	NA	Northern	Male	1	7.5	7					NA	NA	NA		1800
198	198	1984	2	4	NA	Unknown	NA	Northern	Male	1	6.5	6		29.7	13.5		NA	NA	NA		1800
199	199	1984	2	4	NA	Unknown	NA	Northern	Male	1	4.5	4					NA	NA	NA		1800
200	200	1984	2	4	NA	Unknown	NA	Northern	Female	0	0.5	0	0	7.8	3.5		NA	NA	NA		1800
201	201	1984	2	4	NA	Unknown	NA	Northern	Male	1	NA	NA		29.6	13.4		1	Dogs	Dogs		1800
202	202	1984	2	4	NA	Unknown	NA	Northern	Female	0	NA	NA	3	20.5	9.3		NA	NA	Other		1800
203	203	1985	3	9	NA	Washburn	NA	Northern	Female	0	8.5	8	4	17.9	8.1		0	Trapped	Trapped		1633
204	204	1985	3	9	NA	Washburn	NA	Northern	Female	0	3.5	3	0	16.7	7.6		0	Trapped	Trapped		1633
205	205	1985	3	9	NA	Washburn	NA	Northern	Male	1	2.5	2		24.5	11.1		0	Trapped	Trapped		1633
206	206	1985	3	9	NA	Washburn	NA	Northern	Female	0	2.5	2	3				1	Dogs	Dogs		1633
207	207	1985	3	9	NA	Washburn	NA	Northern	Male	1	1.5	1		20.8	9.4		0	Trapped	Trapped		1633
208	208	1985	3	9	NA	Washburn	NA	Northern	Male	1	0.5	0		6.9	3.1		1	Dogs	Dogs		1633
209	209	1985	3	9	NA	Washburn	NA	Northern	Male	1	0.5	0		10.6	4.8		0	Trapped	Trapped		1633
210	210	1985	3	9	NA	Washburn	NA	Northern	Male	1	0.5	0		11.3	5.1		1	Dogs	Dogs		1633
211	211	1985	3	9	NA	Washburn	NA	Northern	Female	0	0.5	0	0	4.7	2.1		1	Dogs	Dogs		1633
212	212	1985	3	9	NA	Washburn	NA	Northern	Female	0	0.5	0	0	6.2	2.8		NA	NA	NA		1633
213	213	1985	3	9	NA	Washburn	NA	Northern	Female	0	0.5	0	0	6.2	2.8		1	Dogs	Dogs		1633
214	214	1985	3	9	NA	Washburn	NA	Northern	Female	0	0.5	0	0	7.1	3.2		1	Dogs	Dogs		1633
215	215	1985	3	9	NA	Vilas	NA	Northern	Male	1	0.5	0		5.9	2.7		NA	NA	Other		1633
216	216	1985	3	9	NA	Taylor	NA	Northern	Male	1	6.5	6		28.5	12.9		1	Dogs	Dogs		1633
217	217	1985	3	9	NA	Taylor	NA	Northern	Female	0	2.5	2	2				1	Dogs	Dogs		1633
218	218	1985	3	9	NA	Taylor	NA	Northern	Male	1	1.5	1		25.3	11.5		1	Dogs	Dogs		1633
219	219	1985	3	9	NA	Taylor	NA	Northern	Female	0	1.5	1	0	11.6	5.3		1	Dogs	Dogs		1633
220	220	1985	3	9	NA	Taylor	NA	Northern	Female	0	1.5	1	1	13.9	6.3		0	Trapped	Trapped		1633
221	221	1985	3	9	NA	Taylor	NA	Northern	Female	0	1.5	1	0	13.3	6		1	Dogs	Dogs		1633
222	222	1985	3	9	NA	Taylor	NA	Northern	Female	0	1.5	1	0	13.5	6.1		1	Dogs	Dogs		1633
223	223	1985	3	9	NA	Taylor	NA	Northern	Female	0	1.5	1	0	16.4	7.4		1	Dogs	Dogs		1633
224	224	1985	3	9	NA	Taylor	NA	Northern	Male	1	0.5	0		7.1	3.2		NA	NA	Other		1633
225	225	1985	3	9	NA	Taylor	NA	Northern	Male	1	0.5	0		10.2	4.6		1	Dogs	Dogs		1633
226	226	1985	3	9	NA	Taylor	NA	Northern	Female	0	0.5	0	0	3.5	1.6		NA	NA	Other		1633
227	227	1985	3	9	NA	Taylor	NA	Northern	Female	0	0.5	0	0	6.2	2.8		1	Dogs	Dogs		1633
228	228	1985	3	9	NA	Sawyer	NA	Northern	Male	1	7.5	7		27.6	12.5		1	Dogs	Dogs		1633
229	229	1985	3	9	NA	Sawyer	NA	Northern	Male	1	6.5	6		21.2	9.6		1	Dogs	Dogs		1633
230	230	1985	3	9	NA	Sawyer	NA	Northern	Male	1	5.5	5					0	Trapped	Trapped		1633
231	231	1985	3	9	NA	Sawyer	NA	Northern	Female	0	5.5	5	2	23.2	10.5		1	Dogs	Dogs		1633
232	232	1985	3	9	NA	Sawyer	NA	Northern	Female	0	4.5	4	0				NA	NA	Other		1633
233	233	1985	3	9	NA	Sawyer	NA	Northern	Male	1	3.5	3					1	Dogs	Dogs		1633
234	234	1985	3	9	NA	Sawyer	NA	Northern	Male	1	3.5	3		27.6	12.5		1	Dogs	Dogs		1633
235	235	1985	3	9	NA	Sawyer	NA	Northern	Female	0	2.5	2	0	15.7	7.1		0	Trapped	Trapped		1633
236	236	1985	3	9	NA	Sawyer	NA	Northern	Female	0	2.5	2	0	17.4	7.9		0	Trapped	Trapped		1633
237	237	1985	3	9	NA	Rusk	NA	Northern	Male	1	8.5	8					1	Dogs	Dogs		1633
238	238	1985	3	9	NA	Rusk	NA	Northern	Male	1	4.5	4		23.4	10.6		1	Dogs	Dogs		1633
239	239	1985	3	9	NA	Rusk	NA	Northern	Male	1	3.5	3		26.6	12.1		1	Dogs	Dogs		1633
240	240	1985	3	9	NA	Rusk	NA	Northern	Male	1	2.5	2		30.8	14		1	Dogs	Dogs		1633
241	241	1985	3	9	NA	Rusk	NA	Northern	Female	0	2.5	2	2	13.2	6		1	Dogs	Dogs		1633
242	242	1985	3	9	NA	Rusk	NA	Northern	Male	1	1.5	1		20.7	9.4		1	Dogs	Dogs		1633
243	243	1985	3	9	NA	Rusk	NA	Northern	Male	1	1.5	1		21.2	9.6		1	Dogs	Dogs		1633
244	244	1985	3	9	NA	Rusk	NA	Northern	Female	0	1.5	1	0	13.1	5.9		0	Trapped	Trapped		1633
245	245	1985	3	9	NA	Rusk	NA	Northern	Female	0	1.5	1	0	14.3	6.5		1	Dogs	Dogs		1633
246	246	1985	3	9	NA	Rusk	NA	Northern	Female	0	1.5	1	0	15.2	6.9		1	Dogs	Dogs		1633
247	247	1985	3	9	NA	Rusk	NA	Northern	Female	0	1.5	1	1	14.5	6.6		0	Trapped	Trapped		1633
248	248	1985	3	9	NA	Rusk	NA	Northern	Female	0	1.5	1	0	15.2	6.9		0	Trapped	Trapped		1633
249	249	1985	3	9	NA	Rusk	NA	Northern	Female	0	1.5	1	0	15.3	6.9		1	Dogs	Dogs		1633
250	250	1985	3	9	NA	Rusk	NA	Northern	Male	1	0.5	0					1	Dogs	Dogs		1633
251	251	1985	3	9	NA	Rusk	NA	Northern	Male	1	0.5	0		7.6	3.4		1	Dogs	Dogs		1633
252	252	1985	3	9	NA	Rusk	NA	Northern	Male	1	0.5	0		8.3	3.8		1	Dogs	Dogs		1633
253	253	1985	3	9	NA	Rusk	NA	Northern	Female	0	0.5	0					1	Dogs	Dogs		1633
254	254	1985	3	9	NA	Price	NA	Northern	Male	1	7.5	7					1	Dogs	Dogs		1633
255	255	1985	3	9	NA	Price	NA	Northern	Male	1	6.5	6					NA	NA	NA		1633
256	256	1985	3	9	NA	Price	NA	Northern	Male	1	5.5	5		28.2	12.8		1	Dogs	Dogs		1633
257	257	1985	3	9	NA	Price	NA	Northern	Female	0	5.5	5	0	13.9	6.3		0	Trapped	Trapped		1633
258	258	1985	3	9	NA	Price	NA	Northern	Male	1	4.5	4		27.2	12.3		1	Dogs	Dogs		1633
259	259	1985	3	9	NA	Price	NA	Northern	Male	1	4.5	4		34.6	15.7		1	Dogs	Dogs		1633
260	260	1985	3	9	NA	Price	NA	Northern	Female	0	4.5	4	0	26.6	12.1		0	Trapped	Trapped		1633
261	261	1985	3	9	NA	Price	NA	Northern	Male	1	3.5	3		29.8	13.5		1	Dogs	Dogs		1633
262	262	1985	3	9	NA	Price	NA	Northern	Male	1	3.5	3		33.1	15		1	Dogs	Dogs		1633
263	263	1985	3	9	NA	Price	NA	Northern	Female	0	3.5	3	0	17.4	7.9		NA	NA	Other		1633
264	264	1985	3	9	NA	Price	NA	Northern	Male	1	1.5	1		24.5	11.1		1	Dogs	Dogs		1633
265	265	1985	3	9	NA	Price	NA	Northern	Female	0	1.5	1	0	11.1	5		1	Dogs	Dogs		1633
266	266	1985	3	9	NA	Price	NA	Northern	Female	0	1.5	1	0	17.7	8		1	Dogs	Dogs		1633
267	267	1985	3	9	NA	Price	NA	Northern	Male	1	0.5	0		9.7	4.4		1	Dogs	Dogs		1633
268	268	1985	3	9	NA	Price	NA	Northern	Male	1	0.5	0		9.9	4.5		0	Trapped	Trapped		1633
269	269	1985	3	9	NA	Price	NA	Northern	Female	0	0.5	0	0	5.4	2.4		0	Trapped	Trapped		1633
270	270	1985	3	9	NA	Price	NA	Northern	Female	0	0.5	0	0	6.7	3		0	Trapped	Trapped		1633
271	271	1985	3	9	NA	Price	NA	Northern	Female	0	0.5	0	0	6.9	3.1		0	Trapped	Trapped		1633
272	272	1985	3	9	NA	Price	NA	Northern	Male	1	NA	NA		25.4	11.5		1	Dogs	Dogs		1633
273	273	1985	3	9	NA	Polk	NA	Northern	Female	0	5.5	5	4	17.7	8		0	Trapped	Trapped		1633
274	274	1985	3	9	NA	Oneida	NA	Northern	Female	0	5.5	5	1				1	Dogs	Dogs		1633
275	275	1985	3	9	NA	Oneida	NA	Northern	Male	1	4.5	4					1	Dogs	Dogs		1633
276	276	1985	3	9	NA	Oneida	NA	Northern	Male	1	3.5	3		23.5	10.7		0	Trapped	Trapped		1633
277	277	1985	3	9	NA	Oneida	NA	Northern	Male	1	2.5	2		25.1	11.4		1	Dogs	Dogs		1633
278	278	1985	3	9	NA	Oneida	NA	Northern	Female	0	1.5	1	3	15.5	7		0	Trapped	Trapped		1633
279	279	1985	3	9	NA	Oneida	NA	Northern	Female	0	0.5	0	0	2.8	1.3		1	Dogs	Dogs		1633
280	280	1985	3	9	NA	Oconto	NA	Northern	Male	1	5.5	5		31.7	14.4		1	Dogs	Dogs		1633
281	281	1985	3	9	NA	Oconto	NA	Northern	Female	0	1.5	1	3	16.5	7.5		0	Trapped	Trapped		1633
282	282	1985	3	9	NA	Oconto	NA	Northern	Female	0	1.5	1	3	21.5	9.8		1	Dogs	Dogs		1633
283	283	1985	3	9	NA	Oconto	NA	Northern	Female	0	1.5	1	0				0	Trapped	Trapped		1633
284	284	1985	3	9	NA	Price	NA	Northern	Female	0	0.5	0	0	8.8	4		1	Dogs	Dogs		1633
285	285	1985	3	9	NA	Oconto	NA	Northern	Male	1	0.5	0		8.7	3.9		1	Dogs	Dogs		1633
286	286	1985	3	9	NA	Oconto	NA	Northern	Male	1	0.5	0		10.8	4.9		0	Trapped	Trapped		1633
287	287	1985	3	9	NA	Marinette	NA	Northern	Female	0	2.5	2	0	12.4	5.6		0	Trapped	Trapped		1633
288	288	1985	3	9	NA	Marinette	NA	Northern	Female	0	1.5	1	2	16.9	7.7		0	Trapped	Trapped		1633
289	289	1985	3	9	NA	Price	NA	Northern	Female	0	1.5	1	2	13.8	6.3		1	Dogs	Dogs		1633
290	290	1985	3	9	NA	Marinette	NA	Northern	Female	0	1.5	1	0	12.3	5.6		0	Trapped	Trapped		1633
291	291	1985	3	9	NA	Marinette	NA	Northern	Female	0	1.5	1	0	16.4	7.4		0	Trapped	Trapped		1633
292	292	1985	3	9	NA	Marinette	NA	Northern	Male	1	0.5	0					1	Dogs	Dogs		1633
293	293	1985	3	9	NA	Marinette	NA	Northern	Male	1	0.5	0					1	Dogs	Dogs		1633
294	294	1985	3	9	NA	Price	NA	Northern	Female	0	3.5	3	3	23.8	10.8		1	Dogs	Dogs		1633
295	295	1985	3	9	NA	Marinette	NA	Northern	Male	1	0.5	0		6.8	3.1		0	Trapped	Trapped		1633
296	296	1985	3	9	NA	Marinette	NA	Northern	Male	1	0.5	0		11.4	5.2		0	Trapped	Trapped		1633
297	297	1985	3	9	NA	Marinette	NA	Northern	Male	1	NA	NA		13.2	6		0	Trapped	Trapped		1633
298	298	1985	3	9	NA	Marinette	NA	Northern	Male	1	NA	NA		17.3	7.8		0	Trapped	Trapped		1633
299	299	1985	3	9	NA	Price	NA	Northern	Male	1	6.5	6		27.1	12.3		1	Dogs	Dogs		1633
300	300	1985	3	9	NA	Lincoln	NA	Northern	Female	0	2.5	2	2	14.4	6.5		NA	NA	Other		1633
301	301	1985	3	9	NA	Lincoln	NA	Northern	Male	1	1.5	1		14.6	6.6		1	Dogs	Dogs		1633
302	302	1985	3	9	NA	Lincoln	NA	Northern	Male	1	1.5	1		15.8	7.2		1	Dogs	Dogs		1633
303	303	1985	3	9	NA	Lincoln	NA	Northern	Male	1	1.5	1		22.9	10.4		1	Dogs	Dogs		1633
304	304	1985	3	9	NA	Rusk	NA	Northern	Male	1	0.5	0		9.3	4.2		1	Dogs	Dogs		1633
305	305	1985	3	9	NA	Lincoln	NA	Northern	Female	0	0.5	0	0	10.4	4.7		0	Trapped	Trapped		1633
306	306	1985	3	9	NA	Lincoln	NA	Northern	Male	1	NA	NA		11.7	5.3		1	Dogs	Dogs		1633
307	307	1985	3	9	NA	Langlade	NA	Northern	Male	1	2.5	2		25.2	11.4		1	Dogs	Dogs		1633
308	308	1985	3	9	NA	Langlade	NA	Northern	Female	0	2.5	2	2	19.4	8.8		1	Dogs	Dogs		1633
309	309	1985	3	9	NA	Rusk	NA	Northern	Male	1	0.5	0		10.6	4.8		1	Dogs	Dogs		1633
310	310	1985	3	9	NA	Langlade	NA	Northern	Female	0	1.5	1	3	17.4	7.9		0	Trapped	Trapped		1633
311	311	1985	3	9	NA	Langlade	NA	Northern	Female	0	1.5	1	1	15.4	7		1	Dogs	Dogs		1633
312	312	1985	3	9	NA	Langlade	NA	Northern	Female	0	1.5	1	0	15.4	7		1	Dogs	Dogs		1633
313	313	1985	3	9	NA	Langlade	NA	Northern	Male	1	0.5	0					NA	NA	Other		1633
314	314	1985	3	9	NA	Langlade	NA	Northern	Female	0	0.5	0	0	8.6	3.9		1	Dogs	Dogs		1633
315	315	1985	3	9	NA	Langlade	NA	Northern	Male	1	NA	NA		34.6	15.7		1	Dogs	Dogs		1633
316	316	1985	3	9	NA	Rusk	NA	Northern	Male	1	1.5	1		24.2	11		1	Dogs	Dogs		1633
317	317	1985	3	9	NA	Iron	NA	Northern	Female	0	5.5	5	4	24.3	11		0	Trapped	Trapped		1633
318	318	1985	3	9	NA	Iron	NA	Northern	Male	1	1.5	1		12.5	5.7		0	Trapped	Trapped		1633
319	319	1985	3	9	NA	Rusk	NA	Northern	Male	1	2.5	2		31.5	14.3		1	Dogs	Dogs		1633
320	320	1985	3	9	NA	Iron	NA	Northern	Male	1	1.5	1		21.5	9.8		0	Trapped	Trapped		1633
321	321	1985	3	9	NA	Iron	NA	Northern	Female	0	0.5	0		7.7	3.5		0	Trapped	Trapped		1633
322	322	1985	3	9	NA	Forest	NA	Northern	Female	0	4.5	4	1	11.8	5.4		0	Trapped	Trapped		1633
323	323	1985	3	9	NA	Forest	NA	Northern	Male	1	1.5	1		12.8	5.8		0	Trapped	Trapped		1633
324	324	1985	3	9	NA	Sawyer	NA	Northern	Female	0	1.5	1	0	13.8	6.3		0	Trapped	Trapped		1633
325	325	1985	3	9	NA	Forest	NA	Northern	Male	1	1.5	1		14.7	6.7		1	Dogs	Dogs		1633
326	326	1985	3	9	NA	Forest	NA	Northern	Female	0	1.5	1	0	14.8	6.7		1	Dogs	Dogs		1633
327	327	1985	3	9	NA	Forest	NA	Northern	Female	0	1.5	1	0	17.5	7.9		1	Dogs	Dogs		1633
328	328	1985	3	9	NA	Forest	NA	Northern	Male	1	0.5	0		13.2	6		0	Trapped	Trapped		1633
329	329	1985	3	9	NA	Florence	NA	Northern	Female	0	6.5	6	0	10.1	4.6		0	Trapped	Trapped		1633
330	330	1985	3	9	NA	Florence	NA	Northern	Female	0	4.5	4	2	14.9	6.8		0	Trapped	Trapped		1633
331	331	1985	3	9	NA	Douglas	NA	Northern	Female	0	7.5	7	0	15.3	6.9		1	Dogs	Dogs		1633
332	332	1985	3	9	NA	Douglas	NA	Northern	Male	1	5.5	5		20.7	9.4		1	Dogs	Dogs		1633
333	333	1985	3	9	NA	Sawyer	NA	Northern	Male	1	5.5	5		30.6	13.9		0	Trapped	Trapped		1633
334	334	1985	3	9	NA	Douglas	NA	Northern	Male	1	5.5	5		25.2	11.4		1	Dogs	Dogs		1633
335	335	1985	3	9	NA	Douglas	NA	Northern	Male	1	5.5	5		30.4	13.8		1	Dogs	Dogs		1633
336	336	1985	3	9	NA	Taylor	NA	Northern	Female	0	0.5	0	0	6.3	2.9		1	Dogs	Dogs		1633
337	337	1985	3	9	NA	Douglas	NA	Northern	Female	0	2.5	2	0				1	Dogs	Dogs		1633
338	338	1985	3	9	NA	Douglas	NA	Northern	Female	0	1.5	1	0	11.3	5.1		0	Trapped	Trapped		1633
339	339	1985	3	9	NA	Taylor	NA	Northern	Male	1	0.5	0		11.9	5.4		1	Dogs	Dogs		1633
340	340	1985	3	9	NA	Douglas	NA	Northern	Male	1	0.5	0		9.1	4.1		1	Dogs	Dogs		1633
341	341	1985	3	9	NA	Douglas	NA	Northern	Female	0	0.5	0	0				0	Trapped	Trapped		1633
342	342	1985	3	9	NA	Douglas	NA	Northern	Female	0	0.5	0	0	9.5	4.3		0	Trapped	Trapped		1633
343	343	1985	3	9	NA	Chippewa	NA	Northern	Male	1	3.5	3		27.8	12.6		1	Dogs	Dogs		1633
344	344	1985	3	9	NA	Chippewa	NA	Northern	Male	1	2.5	2		17.5	7.9		1	Dogs	Dogs		1633
345	345	1985	3	9	NA	Chippewa	NA	Northern	Female	0	1.5	1	0	13.3	6		1	Dogs	Dogs		1633
346	346	1985	3	9	NA	Chippewa	NA	Northern	Male	1	0.5	0					1	Dogs	Dogs		1633
347	347	1985	3	9	NA	Chippewa	NA	Northern	Male	1	0.5	0		5.8	2.6		1	Dogs	Dogs		1633
348	348	1985	3	9	NA	Taylor	NA	Northern	Female	0	4.5	4	1	19.2	8.7		1	Dogs	Dogs		1633
349	349	1985	3	9	NA	Chippewa	NA	Northern	Male	1	0.5	0		6.2	2.8		1	Dogs	Dogs		1633
350	350	1985	3	9	NA	Chippewa	NA	Northern	Female	0	0.5	0	0	7.2	3.3		NA	NA	Other		1633
351	351	1985	3	9	NA	Chippewa	NA	Northern	Female	0	0.5	0	0	9.6	4.4		1	Dogs	Dogs		1633
352	352	1985	3	9	NA	Burnett	NA	Northern	Male	1	2.5	2		9.4	4.3		1	Dogs	Dogs		1633
353	353	1985	3	9	NA	Washburn	NA	Northern	Female	0	0.5	0	0	9.1	4.1		1	Dogs	Dogs		1633
354	354	1985	3	9	NA	Burnett	NA	Northern	Male	1	1.5	1		8.4	3.8		0	Trapped	Trapped		1633
355	355	1985	3	9	NA	Burnett	NA	Northern	Female	0	1.5	1	2	17.8	8.1		1	Dogs	Dogs		1633
356	356	1985	3	9	NA	Washburn	NA	Northern	Female	0	0.5	0	2	13.8	6.3		1	Dogs	Dogs		1633
357	357	1985	3	9	NA	Burnett	NA	Northern	Male	1	0.5	0		24.6	11.2		1	Dogs	Dogs		1633
358	358	1985	3	9	NA	Burnett	NA	Northern	Male	1	0.5	0		13.7	6.2		1	Dogs	Dogs		1633
359	359	1985	3	9	NA	Burnett	NA	Northern	Male	1	NA	NA					1	Dogs	Dogs		1633
360	360	1985	3	9	NA	Bayfield	NA	Northern	Male	1	8.5	8		9.1	4.1		0	Trapped	Trapped		1633
361	361	1985	3	9	NA	Bayfield	NA	Northern	Male	1	1.5	1					0	Trapped	Trapped		1633
362	362	1985	3	9	NA	Bayfield	NA	Northern	Female	0	1.5	1		34.4	15.6		1	Dogs	Dogs		1633
363	363	1985	3	9	NA	Washburn	NA	Northern	Female	0	3.5	3	2	17.6	8		0	Trapped	Trapped		1633
364	364	1985	3	9	NA	Bayfield	NA	Northern	Male	1	0.5	0		25.6	11.6		1	Dogs	Dogs		1633
365	365	1985	3	9	NA	Barron	NA	Northern	Male	1	2.5	2		10.2	4.6		0	Trapped	Trapped		1633
366	366	1985	3	9	NA	Barron	NA	Northern	Female	0	1.5	1	0	10.8	4.9		1	Dogs	Dogs		1633
367	367	1985	3	9	NA	Barron	NA	Northern	Female	0	0.5	0	0	17.1	7.8		1	Dogs	Dogs		1633
368	368	1985	3	9	NA	Ashland	NA	Northern	Female	0	1.5	1	0	16.8	7.6		0	Trapped	Trapped		1633
369	369	1985	3	9	NA	Unknown	NA	Northern	Male	1	6.5	6		22.5	10.2		NA	NA	NA		1633
370	370	1985	3	9	NA	Unknown	NA	Northern	Male	1	3.5	3					NA	NA	NA		1633
371	371	1985	3	9	NA	Unknown	NA	Northern	Female	0	2.5	2	0	18.2	8.3		NA	NA	NA		1633
372	372	1985	3	9	NA	Unknown	NA	Northern	Male	1	1.5	1		13.9	6.3		NA	NA	NA		1633
373	373	1985	3	9	NA	Unknown	NA	Northern	Male	1	1.5	1		22.6	10.3		NA	NA	NA		1633
374	374	1985	3	9	NA	Unknown	NA	Northern	Male	1	1.5	1		28.8	13.1		NA	NA	NA		1633
375	375	1985	3	9	NA	Unknown	NA	Northern	Male	1	0.5	0		7.4	3.4		NA	NA	NA		1633
376	376	1985	3	9	NA	Unknown	NA	Northern	Female	0	0.5	0	0	7.7	3.5		NA	NA	NA		1633
377	377	1986	4	16	NA	Washburn	NA	Northern	Male	1	9.5	9					1	Dogs	Dogs		1630
378	378	1986	4	16	NA	Washburn	NA	Northern	Male	1	7.5	7					1	Dogs	Dogs		1630
379	379	1986	4	16	NA	Washburn	NA	Northern	Male	1	4.5	4					1	Dogs	Dogs		1630
380	380	1986	4	16	NA	Washburn	NA	Northern	Female	0	1.5	1	0	15.6	7.1		1	Dogs	Dogs		1630
381	381	1986	4	16	NA	Washburn	NA	Northern	Male	1	0.5	0					1	Dogs	Dogs		1630
382	382	1986	4	16	NA	Washburn	NA	Northern	Female	0	0.5	0	0	8.7	3.9		1	Dogs	Dogs		1630
383	383	1986	4	16	NA	Taylor	NA	Northern	Male	1	2.5	2					1	Dogs	Dogs		1630
384	384	1986	4	16	NA	Taylor	NA	Northern	Male	1	2.5	2		23.7	10.8		1	Dogs	Dogs		1630
385	385	1986	4	16	NA	Taylor	NA	Northern	Male	1	0.5	0		10.2	4.6		1	Dogs	Dogs		1630
386	386	1986	4	16	NA	Taylor	NA	Northern	Male	1	NA	NA		26.5	12		1	Dogs	Dogs		1630
387	387	1986	4	16	NA	Sawyer	NA	Northern	Female	0	6.5	6	2	19.1	8.7		1	Dogs	Dogs		1630
388	388	1986	4	16	NA	Sawyer	NA	Northern	Female	0	6.5	6	1	15.7	7.1		NA	NA	NA		1630
389	389	1986	4	16	NA	Sawyer	NA	Northern	Male	1	4.5	4		24.3	11		0	Trapped	Trapped		1630
390	390	1986	4	16	NA	Sawyer	NA	Northern	Male	1	3.5	3					0	Trapped	Trapped		1630
391	391	1986	4	16	NA	Sawyer	NA	Northern	Female	0	3.5	3	1	17.8	8.1		1	Dogs	Dogs		1630
392	392	1986	4	16	NA	Sawyer	NA	Northern	Male	1	2.5	2		30.5	13.8		1	Dogs	Dogs		1630
393	393	1986	4	16	NA	Sawyer	NA	Northern	Female	0	2.5	2	3	20.5	9.3		1	Dogs	Dogs		1630
394	394	1986	4	16	NA	Sawyer	NA	Northern	Female	0	1.5	1	3	20.5	9.3		1	Dogs	Dogs		1630
395	395	1986	4	16	NA	Sawyer	NA	Northern	Female	0	1.5	1	0	11.4	5.2		0	Trapped	Trapped		1630
396	396	1986	4	16	NA	Sawyer	NA	Northern	Male	1	0.5	0		7.1	3.2		1	Dogs	Dogs		1630
397	397	1986	4	16	NA	Sawyer	NA	Northern	Female	0	0.5	0	0				NA	NA	NA		1630
398	398	1986	4	16	NA	Sawyer	NA	Northern	Female	0	0.5	0	0	5.5	2.5		NA	NA	NA		1630
399	399	1986	4	16	NA	Rusk	NA	Northern	Male	1	7.5	7					1	Dogs	Dogs		1630
400	400	1986	4	16	NA	Rusk	NA	Northern	Male	1	5.5	5		24.3	11		0	Trapped	Trapped		1630
401	401	1986	4	16	NA	Rusk	NA	Northern	Male	1	4.5	4					1	Dogs	Dogs		1630
402	402	1986	4	16	NA	Rusk	NA	Northern	Male	1	2.5	2		25.2	11.4		1	Dogs	Dogs		1630
403	403	1986	4	16	NA	Rusk	NA	Northern	Male	1	1.5	1					1	Dogs	Dogs		1630
404	404	1986	4	16	NA	Rusk	NA	Northern	Male	1	0.5	0		10.2	4.6		1	Dogs	Dogs		1630
405	405	1986	4	16	NA	Rusk	NA	Northern	Female	0	0.5	0	0	5.9	2.7		1	Dogs	Dogs		1630
406	406	1986	4	16	NA	Rusk	NA	Northern	Female	0	0.5	0	0	9.1	4.1		1	Dogs	Dogs		1630
407	407	1986	4	16	NA	Price	NA	Northern	Female	0	6.5	6	3	17.6	8		0	Trapped	Trapped		1630
408	408	1986	4	16	NA	Price	NA	Northern	Female	0	5.5	5	2				0	Trapped	Trapped		1630
409	409	1986	4	16	NA	Price	NA	Northern	Male	1	1.5	1					1	Dogs	Dogs		1630
410	410	1986	4	16	NA	Price	NA	Northern	Male	1	1.5	1		22.2	10.1		0	Trapped	Trapped		1630
411	411	1986	4	16	NA	Price	NA	Northern	Female	0	1.5	1	0				0	Trapped	Trapped		1630
412	412	1986	4	16	NA	Price	NA	Northern	Female	0	1.5	1	0	17.4	7.9		0	Trapped	Trapped		1630
413	413	1986	4	16	NA	Price	NA	Northern	Female	0	1.5	1	0	18.3	8.3		1	Dogs	Dogs		1630
414	414	1986	4	16	NA	Price	NA	Northern	Male	1	0.5	0					1	Dogs	Dogs		1630
415	415	1986	4	16	NA	Price	NA	Northern	Female	0	0.5	0	0	7.7	3.5		0	Trapped	Trapped		1630
416	416	1986	4	16	NA	Price	NA	Northern	Female	0	0.5	0	0	8.2	3.7		NA	NA	Other		1630
417	417	1986	4	16	NA	Price	NA	Northern	Female	0	0.5	0	0	8.8	4		1	Dogs	Dogs		1630
418	418	1986	4	16	NA	Price	NA	Northern	Male	1	NA	NA		8.3	3.8		0	Trapped	Trapped		1630
419	419	1986	4	16	NA	Price	NA	Northern	Male	1	NA	NA		8.4	3.8		0	Trapped	Trapped		1630
420	420	1986	4	16	NA	Price	NA	Northern	Female	0	NA	NA		15.8	7.2		0	Trapped	Trapped		1630
421	421	1986	4	16	NA	Price	NA	Northern	Female	0	NA	NA		17.8	8.1		1	Dogs	Dogs		1630
422	422	1986	4	16	NA	Oneida	NA	Northern	Male	1	11.5	11					1	Dogs	Dogs		1630
423	423	1986	4	16	NA	Oneida	NA	Northern	Female	0	6.5	6	3	15.4	7		1	Dogs	Dogs		1630
424	424	1986	4	16	NA	Oneida	NA	Northern	Male	1	4.5	4		19.5	8.8		1	Dogs	Dogs		1630
425	425	1986	4	16	NA	Oneida	NA	Northern	Male	1	3.5	3		26.8	12.2		1	Dogs	Dogs		1630
426	426	1986	4	16	NA	Oneida	NA	Northern	Female	0	3.5	3	0	16.6	7.5		0	Trapped	Trapped		1630
427	427	1986	4	16	NA	Oneida	NA	Northern	Male	1	1.5	1					1	Dogs	Dogs		1630
428	428	1986	4	16	NA	Oneida	NA	Northern	Male	1	1.5	1					1	Dogs	Dogs		1630
429	429	1986	4	16	NA	Oneida	NA	Northern	Male	1	1.5	1		25.4	11.5		1	Dogs	Dogs		1630
430	430	1986	4	16	NA	Oneida	NA	Northern	Female	0	1.5	1	4				1	Dogs	Dogs		1630
431	431	1986	4	16	NA	Oneida	NA	Northern	Male	1	0.5	0		5.6	2.5		1	Dogs	Dogs		1630
432	432	1986	4	16	NA	Oneida	NA	Northern	Male	1	0.5	0		10.3	4.7		0	Trapped	Trapped		1630
433	433	1986	4	16	NA	Oneida	NA	Northern	Female	0	0.5	0	0				1	Dogs	Dogs		1630
434	434	1986	4	16	NA	Oconto	NA	Northern	Male	1	10.5	10					1	Dogs	Dogs		1630
435	435	1986	4	16	NA	Oconto	NA	Northern	Male	1	6.5	6					1	Dogs	Dogs		1630
436	436	1986	4	16	NA	Oconto	NA	Northern	Female	0	5.5	5		16.8	7.6		0	Trapped	Trapped		1630
437	437	1986	4	16	NA	Oconto	NA	Northern	Male	1	4.5	4		24.3	11		0	Trapped	Trapped		1630
438	438	1986	4	16	NA	Oconto	NA	Northern	Male	1	2.5	2		27.7	12.6		1	Dogs	Dogs		1630
439	439	1986	4	16	NA	Oconto	NA	Northern	Male	1	1.5	1					0	Trapped	Trapped		1630
440	440	1986	4	16	NA	Oconto	NA	Northern	Male	1	1.5	1		16.8	7.6		0	Trapped	Trapped		1630
441	441	1986	4	16	NA	Oconto	NA	Northern	Female	0	1.5	1	4				0	Trapped	Trapped		1630
442	442	1986	4	16	NA	Oconto	NA	Northern	Female	0	0.5	0	0	5.6	2.5		0	Trapped	Trapped		1630
443	443	1986	4	16	NA	Marinette	NA	Northern	Female	0	7.5	7	4	22.5	10.2		0	Trapped	Trapped		1630
444	444	1986	4	16	NA	Marinette	NA	Northern	Female	0	6.5	6	3	17.4	7.9		1	Dogs	Dogs		1630
445	445	1986	4	16	NA	Marinette	NA	Northern	Female	0	5.5	5	0	17.9	8.1		0	Trapped	Trapped		1630
446	446	1986	4	16	NA	Marinette	NA	Northern	Female	0	4.5	4	0	14.5	6.6		0	Trapped	Trapped		1630
447	447	1986	4	16	NA	Marinette	NA	Northern	Male	1	2.5	2		20.6	9.3		0	Trapped	Trapped		1630
448	448	1986	4	16	NA	Marinette	NA	Northern	Female	0	2.5	2	0	6.7	3		0	Trapped	Trapped		1630
449	449	1986	4	16	NA	Marinette	NA	Northern	Male	1	1.5	1					0	Trapped	Trapped		1630
450	450	1986	4	16	NA	Marinette	NA	Northern	Male	1	1.5	1		14.9	6.8		0	Trapped	Trapped		1630
451	451	1986	4	16	NA	Marinette	NA	Northern	Female	0	1.5	1	0	12.8	5.8		NA	NA	Other		1630
452	452	1986	4	16	NA	Marinette	NA	Northern	Female	0	1.5	1	0	14.4	6.5		1	Dogs	Dogs		1630
453	453	1986	4	16	NA	Marinette	NA	Northern	Female	0	5.5	5	2	15.8	7.2		0	Trapped	Trapped		1630
454	454	1986	4	16	NA	Marinette	NA	Northern	Male	1	8.5	8					0	Trapped	Trapped		1630
455	455	1986	4	16	NA	Oconto	NA	Northern	Male	1	1.5	1		19.8	9		0	Trapped	Trapped		1630
456	456	1986	4	16	NA	Marinette	NA	Northern	Male	1	0.5	0		9.4	4.3		0	Trapped	Trapped		1630
457	457	1986	4	16	NA	Marinette	NA	Northern	Male	1	0.5	0		10.6	4.8		0	Trapped	Trapped		1630
458	458	1986	4	16	NA	Marinette	NA	Northern	Male	1	0.5	0		12.9	5.9		NA	NA	Other		1630
459	459	1986	4	16	NA	Marinette	NA	Northern	Male	1	0.5	0		14.4	6.5		1	Dogs	Dogs		1630
460	460	1986	4	16	NA	Marinette	NA	Northern	Female	0	0.5	0	0				0	Trapped	Trapped		1630
461	461	1986	4	16	NA	Marinette	NA	Northern	Female	0	0.5	0	0	7.6	3.4		1	Dogs	Dogs		1630
462	462	1986	4	16	NA	Marinette	NA	Northern	Female	0	0.5	0	0	8.3	3.8		1	Dogs	Dogs		1630
463	463	1986	4	16	NA	Marinette	NA	Northern	Female	0	0.5	0	0	10.5	4.8		1	Dogs	Dogs		1630
464	464	1986	4	16	NA	Oneida	NA	Northern	Female	0	0.5	0	0	10.4	4.7		0	Trapped	Trapped		1630
465	465	1986	4	16	NA	Lincoln	NA	Northern	Male	1	8.5	8					1	Dogs	Dogs		1630
466	466	1986	4	16	NA	Lincoln	NA	Northern	Male	1	6.5	6		27.4	12.4		1	Dogs	Dogs		1630
467	467	1986	4	16	NA	Lincoln	NA	Northern	Male	1	4.5	4					1	Dogs	Dogs		1630
468	468	1986	4	16	NA	Lincoln	NA	Northern	Male	1	4.5	4		25.8	11.7		0	Trapped	Trapped		1630
469	469	1986	4	16	NA	Oneida	NA	Northern	Female	0	1.5	1	4	14.2	6.4		1	Dogs	Dogs		1630
470	470	1986	4	16	NA	Lincoln	NA	Northern	Female	0	3.5	3	4	17.2	7.8		0	Trapped	Trapped		1630
471	471	1986	4	16	NA	Lincoln	NA	Northern	Male	1	2.5	2		27.7	12.6		1	Dogs	Dogs		1630
472	472	1986	4	16	NA	Lincoln	NA	Northern	Male	1	1.5	1		17.8	8.1		0	Trapped	Trapped		1630
473	473	1986	4	16	NA	Lincoln	NA	Northern	Male	1	1.5	1		19.7	8.9		1	Dogs	Dogs		1630
474	474	1986	4	16	NA	Oneida	NA	Northern	Male	1	2.5	2		30.2	13.7		1	Dogs	Dogs		1630
475	475	1986	4	16	NA	Lincoln	NA	Northern	Female	0	1.5	1		12.4	5.6		1	Dogs	Dogs		1630
476	476	1986	4	16	NA	Lincoln	NA	Northern	Male	1	0.5	0		7.5	3.4		0	Trapped	Trapped		1630
477	477	1986	4	16	NA	Lincoln	NA	Northern	Male	1	0.5	0		9.4	4.3		0	Trapped	Trapped		1630
478	478	1986	4	16	NA	Lincoln	NA	Northern	Male	1	0.5	0		9.8	4.4		0	Trapped	Trapped		1630
479	479	1986	4	16	NA	Price	NA	Northern	Male	1	NA	NA		21.9	9.9		0	Trapped	Trapped		1630
480	480	1986	4	16	NA	Lincoln	NA	Northern	Female	0	0.5	0	0	4.9	2.2		1	Dogs	Dogs		1630
481	481	1986	4	16	NA	Langlade	NA	Northern	Female	0	5.5	5	3	22.5	10.2		1	Dogs	Dogs		1630
482	482	1986	4	16	NA	Langlade	NA	Northern	Male	1	4.5	4		21.3	9.7		NA	NA	Other		1630
483	483	1986	4	16	NA	Langlade	NA	Northern	Male	1	3.5	3					1	Dogs	Dogs		1630
484	484	1986	4	16	NA	Price	NA	Northern	Female	0	0.5	0	0	9.1	4.1		0	Trapped	Trapped		1630
485	485	1986	4	16	NA	Langlade	NA	Northern	Female	0	3.5	3	2				0	Trapped	Trapped		1630
486	486	1986	4	16	NA	Langlade	NA	Northern	Male	1	1.5	1					1	Dogs	Dogs		1630
487	487	1986	4	16	NA	Langlade	NA	Northern	Male	1	1.5	1					1	Dogs	Dogs		1630
488	488	1986	4	16	NA	Langlade	NA	Northern	Female	0	1.5	1	0	20	9.1		1	Dogs	Dogs		1630
489	489	1986	4	16	NA	Price	NA	Northern	Male	1	0.5	0					0	Trapped	Trapped		1630
490	490	1986	4	16	NA	Langlade	NA	Northern	Female	0	1.5	1	1				0	Trapped	Trapped		1630
491	491	1986	4	16	NA	Langlade	NA	Northern	Male	1	0.5	0		7.1	3.2		0	Trapped	Trapped		1630
492	492	1986	4	16	NA	Langlade	NA	Northern	Male	1	0.5	0		8.3	3.8		0	Trapped	Trapped		1630
493	493	1986	4	16	NA	Langlade	NA	Northern	Male	1	0.5	0		10.3	4.7		0	Trapped	Trapped		1630
494	494	1986	4	16	NA	Iron	NA	Northern	Male	1	1.5	1					0	Trapped	Trapped		1630
495	495	1986	4	16	NA	Iron	NA	Northern	Male	1	1.5	1		20.7	9.4		1	Dogs	Dogs		1630
496	496	1986	4	16	NA	Rusk	NA	Northern	Male	1	NA	NA		35.6	16.1		1	Dogs	Dogs		1630
497	497	1986	4	16	NA	Forest	NA	Northern	Male	1	7.5	7		16.4	7.4		0	Trapped	Trapped		1630
498	498	1986	4	16	NA	Forest	NA	Northern	Female	0	4.5	4	0	17.8	8.1		0	Trapped	Trapped		1630
499	499	1986	4	16	NA	Rusk	NA	Northern	Male	1	1.5	1		22.5	10.2		0	Trapped	Trapped		1630
500	500	1986	4	16	NA	Forest	NA	Northern	Female	0	3.5	3	1				1	Dogs	Dogs		1630
501	501	1986	4	16	NA	Forest	NA	Northern	Male	1	2.5	2		24.5	11.1		1	Dogs	Dogs		1630
502	502	1986	4	16	NA	Forest	NA	Northern	Female	0	2.5	2	0	17.8	8.1		0	Trapped	Trapped		1630
503	503	1986	4	16	NA	Forest	NA	Northern	Male	1	1.5	1		23.3	10.6		1	Dogs	Dogs		1630
504	504	1986	4	16	NA	Rusk	NA	Northern	Female	0	5.5	5	0	18.7	8.5		0	Trapped	Trapped		1630
505	505	1986	4	16	NA	Forest	NA	Northern	Male	1	1.5	1		30.4	13.8		NA	NA	Other		1630
506	506	1986	4	16	NA	Forest	NA	Northern	Female	0	1.5	1	0	14.9	6.8		1	Dogs	Dogs		1630
507	507	1986	4	16	NA	Forest	NA	Northern	Male	1	0.5	0					0	Trapped	Trapped		1630
508	508	1986	4	16	NA	Forest	NA	Northern	Male	1	0.5	0		5.6	2.5		0	Trapped	Trapped		1630
509	509	1986	4	16	NA	Forest	NA	Northern	Male	1	0.5	0		8.5	3.9		1	Dogs	Dogs		1630
510	510	1986	4	16	NA	Forest	NA	Northern	Female	0	0.5	0	0	8.6	3.9		0	Trapped	Trapped		1630
511	511	1986	4	16	NA	Florence	NA	Northern	Male	1	6.5	6					0	Trapped	Trapped		1630
512	512	1986	4	16	NA	Florence	NA	Northern	Male	1	4.5	4		25.3	11.5		0	Trapped	Trapped		1630
513	513	1986	4	16	NA	Florence	NA	Northern	Female	0	4.5	4	0	18.4	8.3		0	Trapped	Trapped		1630
514	514	1986	4	16	NA	Florence	NA	Northern	Female	0	3.5	3	4	12.8	5.8		0	Trapped	Trapped		1630
515	515	1986	4	16	NA	Florence	NA	Northern	Female	0	1.5	1	0	12.2	5.5		0	Trapped	Trapped		1630
516	516	1986	4	16	NA	Florence	NA	Northern	Male	1	0.5	0		6.8	3.1		0	Trapped	Trapped		1630
517	517	1986	4	16	NA	Sawyer	NA	Northern	Male	1	3.5	3		24.4	11.1		0	Trapped	Trapped		1630
518	518	1986	4	16	NA	Florence	NA	Northern	Female	0	0.5	0	0	9.3	4.2		NA	NA	Other		1630
519	519	1986	4	16	NA	Douglas	NA	Northern	Male	1	7.5	7		26.5	12		0	Trapped	Trapped		1630
520	520	1986	4	16	NA	Douglas	NA	Northern	Male	1	6.5	6		19.7	8.9		1	Dogs	Dogs		1630
521	521	1986	4	16	NA	Douglas	NA	Northern	Female	0	3.5	3	4	17.9	8.1		1	Dogs	Dogs		1630
522	522	1986	4	16	NA	Sawyer	NA	Northern	Male	1	10.5	10		31.5	14.3		1	Dogs	Dogs		1630
523	523	1986	4	16	NA	Douglas	NA	Northern	Male	1	2.5	2					0	Trapped	Trapped		1630
524	524	1986	4	16	NA	Douglas	NA	Northern	Female	0	2.5	2	3				1	Dogs	Dogs		1630
525	525	1986	4	16	NA	Douglas	NA	Northern	Male	1	1.5	1		25.4	11.5		0	Trapped	Trapped		1630
526	526	1986	4	16	NA	Douglas	NA	Northern	Female	0	1.5	1	0	15.1	6.8		0	Trapped	Trapped		1630
527	527	1986	4	16	NA	Douglas	NA	Northern	Female	0	1.5	1	0	15.5	7		0	Trapped	Trapped		1630
528	528	1986	4	16	NA	Douglas	NA	Northern	Female	0	1.5	1	2	13.4	6.1		0	Trapped	Trapped		1630
529	529	1986	4	16	NA	Douglas	NA	Northern	Male	1	0.5	0		7.4	3.4		0	Trapped	Trapped		1630
530	530	1986	4	16	NA	Chippewa	NA	Northern	Male	1	2.5	2					1	Dogs	Dogs		1630
531	531	1986	4	16	NA	Washburn	NA	Northern	Male	1	4.5	4					1	Dogs	Dogs		1630
532	532	1986	4	16	NA	Chippewa	NA	Northern	Female	0	2.5	2	2	18.5	8.4		1	Dogs	Dogs		1630
533	533	1986	4	16	NA	Chippewa	NA	Northern	Male	1	1.5	1		15.8	7.2		1	Dogs	Dogs		1630
534	534	1986	4	16	NA	Chippewa	NA	Northern	Male	1	1.5	1		23.8	10.8		1	Dogs	Dogs		1630
535	535	1986	4	16	NA	Burnett	NA	Northern	Male	1	2.5	2					1	Dogs	Dogs		1630
536	536	1986	4	16	NA	Burnett	NA	Northern	Female	0	2.5	2	1	14.2	6.4		1	Dogs	Dogs		1630
537	537	1986	4	16	NA	Bayfield	NA	Northern	Male	1	8.5	8		25.5	11.6		1	Dogs	Dogs		1630
538	538	1986	4	16	NA	Bayfield	NA	Northern	Male	1	0.5	0		10.4	4.7		0	Trapped	Trapped		1630
539	539	1986	4	16	NA	Bayfield	NA	Northern	Female	0	0.5	0	0				0	Trapped	Trapped		1630
540	540	1986	4	16	NA	Ashland	NA	Northern	Female	0	1.5	1					0	Trapped	Trapped		1630
541	541	1986	4	16	NA	Unknown	NA	Northern	Female	0	1.5	1					0	Trapped	Trapped		1630
542	542	1986	4	16	NA	Unknown	NA	Northern	Male	1	NA	NA		17.8	8.1		NA	NA	NA		1630
543	543	1987	5	25	NA	Washburn	NA	Northern	Female	0	8.5	8	1	18.3	8.3		1	Dogs	Dogs	0.0502	1688
544	544	1987	5	25	NA	Washburn	NA	Northern	Male	1	4.5	4		26.5	12		1	Dogs	Dogs	0.0502	1688
545	545	1987	5	25	NA	Washburn	NA	Northern	Male	1	2.5	2		16.5	7.5		1	Dogs	Dogs	0.0502	1688
546	546	1987	5	25	NA	Washburn	NA	Northern	Female	0	2.5	2	2				1	Dogs	Dogs	0.0502	1688
547	547	1987	5	25	NA	Washburn	NA	Northern	Female	0	2.5	2	2	13.7	6.2		1	Dogs	Dogs	0.0502	1688
548	548	1987	5	25	NA	Washburn	NA	Northern	Male	1	1.5	1					0	Trapped	Trapped	0.0502	1688
549	549	1987	5	25	NA	Washburn	NA	Northern	Male	1	1.5	1		24.3	11		1	Dogs	Dogs	0.0502	1688
550	550	1987	5	25	NA	Washburn	NA	Northern	Female	0	1.5	1	3				1	Dogs	Dogs	0.0502	1688
551	551	1987	5	25	NA	Washburn	NA	Northern	Male	1	0.5	0		11.5	5.2		1	Dogs	Dogs	0.0502	1688
552	552	1987	5	25	NA	Washburn	NA	Northern	Male	1	0.5	0		11.9	5.4		1	Dogs	Dogs	0.0502	1688
553	553	1987	5	25	NA	Washburn	NA	Northern	Female	0	0.5	0	0	8.8	4		NA	NA	NA	0.0502	1688
554	554	1987	5	25	NA	Washburn	NA	Northern	Female	0	0.5	0	0	9.4	4.3		1	Dogs	Dogs	0.0502	1688
555	555	1987	5	25	NA	Washburn	NA	Northern	Female	0	0.5	0	0	10.3	4.7		1	Dogs	Dogs	0.0502	1688
556	556	1987	5	25	NA	Washburn	NA	Northern	Female	0	0.5	0	0	10.6	4.8		1	Dogs	Dogs	0.0502	1688
557	557	1987	5	25	NA	Taylor	NA	Northern	Male	1	4.5	4		19.7	8.9		1	Dogs	Dogs	0.0502	1688
558	558	1987	5	25	NA	Taylor	NA	Northern	Male	1	4.5	4		23.3	10.6		0	Trapped	Trapped	0.0502	1688
559	559	1987	5	25	NA	Taylor	NA	Northern	Female	0	2.5	2	3	16.1	7.3		1	Dogs	Dogs	0.0502	1688
560	560	1987	5	25	NA	Taylor	NA	Northern	Male	1	1.5	1					1	Dogs	Dogs	0.0502	1688
561	561	1987	5	25	NA	Taylor	NA	Northern	Male	1	1.5	1					1	Dogs	Dogs	0.0502	1688
562	562	1987	5	25	NA	Taylor	NA	Northern	Female	0	1.5	1	4	11.3	5.1		1	Dogs	Dogs	0.0502	1688
563	563	1987	5	25	NA	Taylor	NA	Northern	Male	1	0.5	0		10.7	4.9		1	Dogs	Dogs	0.0502	1688
564	564	1987	5	25	NA	Taylor	NA	Northern	Male	1	0.5	0		12.9	5.9		1	Dogs	Dogs	0.0502	1688
565	565	1987	5	25	NA	Taylor	NA	Northern	Female	0	0.5	0	0	9.1	4.1		1	Dogs	Dogs	0.0502	1688
566	566	1987	5	25	NA	Taylor	NA	Northern	Female	0	NA	NA	3	14.8	6.7		1	Dogs	Dogs	0.0502	1688
567	567	1987	5	25	NA	Sawyer	NA	Northern	Male	1	1.5	1					0	Trapped	Trapped	0.0502	1688
568	568	1987	5	25	NA	Sawyer	NA	Northern	Male	1	1.5	1		17.6	8		0	Trapped	Trapped	0.0502	1688
569	569	1987	5	25	NA	Sawyer	NA	Northern	Male	1	1.5	1		19.2	8.7		1	Dogs	Dogs	0.0502	1688
570	570	1987	5	25	NA	Sawyer	NA	Northern	Male	1	1.5	1		30.5	13.8		1	Dogs	Dogs	0.0502	1688
571	571	1987	5	25	NA	Sawyer	NA	Northern	Male	1	1.5	1		31.4	14.2		1	Dogs	Dogs	0.0502	1688
572	572	1987	5	25	NA	Sawyer	NA	Northern	Male	1	0.5	0					0	Trapped	Trapped	0.0502	1688
573	573	1987	5	25	NA	Sawyer	NA	Northern	Male	1	0.5	0					0	Trapped	Trapped	0.0502	1688
574	574	1987	5	25	NA	Sawyer	NA	Northern	Female	0	0.5	0	0	9.5	4.3		1	Dogs	Dogs	0.0502	1688
575	575	1987	5	25	NA	Rusk	NA	Northern	Male	1	7.5	7		30.3	13.7		1	Dogs	Dogs	0.0502	1688
576	576	1987	5	25	NA	Rusk	NA	Northern	Male	1	7.5	7		35.5	16.1		1	Dogs	Dogs	0.0502	1688
577	577	1987	5	25	NA	Rusk	NA	Northern	Male	1	1.5	1					1	Dogs	Dogs	0.0502	1688
578	578	1987	5	25	NA	Rusk	NA	Northern	Female	0	1.5	1	0	13.7	6.2		NA	NA	NA	0.0502	1688
579	579	1987	5	25	NA	Price	NA	Northern	Male	1	15.5	15		25.4	11.5		1	Dogs	Dogs	0.0502	1688
580	580	1987	5	25	NA	Price	NA	Northern	Female	0	11.5	11	2	22.8	10.3		0	Trapped	Trapped	0.0502	1688
581	581	1987	5	25	NA	Price	NA	Northern	Female	0	8.5	8	2	15.5	7		0	Trapped	Trapped	0.0502	1688
582	582	1987	5	25	NA	Price	NA	Northern	Female	0	4.5	4		14.4	6.5		0	Trapped	Trapped	0.0502	1688
583	583	1987	5	25	NA	Price	NA	Northern	Male	1	3.5	3					0	Trapped	Trapped	0.0502	1688
584	584	1987	5	25	NA	Price	NA	Northern	Male	1	2.5	2					0	Trapped	Trapped	0.0502	1688
585	585	1987	5	25	NA	Price	NA	Northern	Male	1	2.5	2		18.7	8.5		0	Trapped	Trapped	0.0502	1688
586	586	1987	5	25	NA	Price	NA	Northern	Male	1	2.5	2		28.4	12.9		1	Dogs	Dogs	0.0502	1688
587	587	1987	5	25	NA	Price	NA	Northern	Male	1	1.5	1					1	Dogs	Dogs	0.0502	1688
588	588	1987	5	25	NA	Price	NA	Northern	Female	0	1.5	1	0				0	Trapped	Trapped	0.0502	1688
589	589	1987	5	25	NA	Price	NA	Northern	Female	0	1.5	1	0	16.6	7.5		0	Trapped	Trapped	0.0502	1688
590	590	1987	5	25	NA	Price	NA	Northern	Male	1	0.5	0					0	Trapped	Trapped	0.0502	1688
591	591	1987	5	25	NA	Price	NA	Northern	Female	0	0.5	0	0	4.3	2		0	Trapped	Trapped	0.0502	1688
592	592	1987	5	25	NA	Price	NA	Northern	Female	0	0.5	0	0	9.5	4.3		0	Trapped	Trapped	0.0502	1688
593	593	1987	5	25	NA	Price	NA	Northern	Male	1	0.5	0		5.4	2.4		0	Trapped	Trapped	0.0502	1688
594	594	1987	5	25	NA	Price	NA	Northern	Male	1	1.5	1		23.5	10.7		1	Dogs	Dogs	0.0502	1688
595	595	1987	5	25	NA	Price	NA	Northern	Female	0	NA	NA					0	Trapped	Trapped	0.0502	1688
596	596	1987	5	25	NA	Polk	NA	Northern	Male	1	3.5	3		26.8	12.2		1	Dogs	Dogs	0.0502	1688
597	597	1987	5	25	NA	Polk	NA	Northern	Female	0	2.5	2	0	13.6	6.2		1	Dogs	Dogs	0.0502	1688
598	598	1987	5	25	NA	Oneida	NA	Northern	Female	0	10.5	10					1	Dogs	Dogs	0.0502	1688
599	599	1987	5	25	NA	Oneida	NA	Northern	Male	1	9.5	9					0	Trapped	Trapped	0.0502	1688
600	600	1987	5	25	NA	Oneida	NA	Northern	Male	1	8.5	8					1	Dogs	Dogs	0.0502	1688
601	601	1987	5	25	NA	Oneida	NA	Northern	Female	0	6.5	6	2	16.1	7.3		1	Dogs	Dogs	0.0502	1688
602	602	1987	5	25	NA	Oneida	NA	Northern	Male	1	5.5	5		28.2	12.8		1	Dogs	Dogs	0.0502	1688
603	603	1987	5	25	NA	Price	NA	Northern	Female	0	12.5	12	2				1	Dogs	Dogs	0.0502	1688
604	604	1987	5	25	NA	Oneida	NA	Northern	Male	1	3.5	3					1	Dogs	Dogs	0.0502	1688
605	605	1987	5	25	NA	Oneida	NA	Northern	Male	1	3.5	3		24.5	11.1		0	Trapped	Trapped	0.0502	1688
606	606	1987	5	25	NA	Oneida	NA	Northern	Male	1	2.5	2		18.7	8.5		0	Trapped	Trapped	0.0502	1688
607	607	1987	5	25	NA	Oneida	NA	Northern	Male	1	2.5	2		22.5	10.2		1	Dogs	Dogs	0.0502	1688
608	608	1987	5	25	NA	Rusk	NA	Northern	Female	0	2.5	2	4				1	Dogs	Dogs	0.0502	1688
609	609	1987	5	25	NA	Oneida	NA	Northern	Male	1	2.5	2		29.3	13.3		1	Dogs	Dogs	0.0502	1688
610	610	1987	5	25	NA	Oneida	NA	Northern	Female	0	2.5	2	0	17.6	8		1	Dogs	Dogs	0.0502	1688
611	611	1987	5	25	NA	Oneida	NA	Northern	Male	1	1.5	1		21.8	9.9		0	Trapped	Trapped	0.0502	1688
612	612	1987	5	25	NA	Oneida	NA	Northern	Male	1	1.5	1		26.2	11.9		1	Dogs	Dogs	0.0502	1688
613	613	1987	5	25	NA	Sawyer	NA	Northern	Female	0	0.5	0	0	10.2	4.6		NA	NA	NA	0.0502	1688
614	614	1987	5	25	NA	Oneida	NA	Northern	Female	0	1.5	1		14.8	6.7		1	Dogs	Dogs	0.0502	1688
615	615	1987	5	25	NA	Oneida	NA	Northern	Male	1	0.5	0					0	Trapped	Trapped	0.0502	1688
616	616	1987	5	25	NA	Oneida	NA	Northern	Male	1	0.5	0		11.3	5.1		1	Dogs	Dogs	0.0502	1688
617	617	1987	5	25	NA	Oneida	NA	Northern	Male	1	0.5	0		11.7	5.3		1	Dogs	Dogs	0.0502	1688
618	618	1987	5	25	NA	Oneida	NA	Northern	Male	1	0.5	0		12.1	5.5		1	Dogs	Dogs	0.0502	1688
619	619	1987	5	25	NA	Oneida	NA	Northern	Male	1	0.5	0		12.4	5.6		NA	NA	Other	0.0502	1688
620	620	1987	5	25	NA	Oneida	NA	Northern	Male	1	0.5	0		13.4	6.1		1	Dogs	Dogs	0.0502	1688
621	621	1987	5	25	NA	Oneida	NA	Northern	Male	1	0.5	0		13.7	6.2		1	Dogs	Dogs	0.0502	1688
622	622	1987	5	25	NA	Sawyer	NA	Northern	Female	0	3.5	3	4	17.1	7.8		0	Trapped	Trapped	0.0502	1688
623	623	1987	5	25	NA	Taylor	NA	Northern	Male	1	0.5	0		14.2	6.4		1	Dogs	Dogs	0.0502	1688
624	624	1987	5	25	NA	Oneida	NA	Northern	Female	0	0.5	0	0	8.5	3.9		0	Trapped	Trapped	0.0502	1688
625	625	1987	5	25	NA	Oneida	NA	Northern	Female	0	0.5	0	0	11.7	5.3		1	Dogs	Dogs	0.0502	1688
626	626	1987	5	25	NA	Oneida	NA	Northern	Female	0	0.5	0	0	12.8	5.8		1	Dogs	Dogs	0.0502	1688
627	627	1987	5	25	NA	Oneida	NA	Northern	Male	1	NA	NA					0	Trapped	Trapped	0.0502	1688
628	628	1987	5	25	NA	Taylor	NA	Northern	Male	1	1.5	1		17.5	7.9		1	Dogs	Dogs	0.0502	1688
629	629	1987	5	25	NA	Oneida	NA	Northern	Male	1	NA	NA					0	Trapped	Trapped	0.0502	1688
630	630	1987	5	25	NA	Oconto	NA	Northern	Male	1	3.5	3					0	Trapped	Trapped	0.0502	1688
631	631	1987	5	25	NA	Oconto	NA	Northern	Female	0	3.5	3	2	15.2	6.9		0	Trapped	Trapped	0.0502	1688
632	632	1987	5	25	NA	Oconto	NA	Northern	Male	1	1.5	1		22.5	10.2		0	Trapped	Trapped	0.0502	1688
633	633	1987	5	25	NA	Oconto	NA	Northern	Male	1	0.5	0		13.6	6.2		1	Dogs	Dogs	0.0502	1688
634	634	1987	5	25	NA	Marinette	NA	Northern	Female	0	7.5	7	4	15.5	7		NA	NA	Other	0.0502	1688
635	635	1987	5	25	NA	Washburn	NA	Northern	Female	0	0.5	0	0	11.8	5.4		1	Dogs	Dogs	0.0502	1688
636	636	1987	5	25	NA	Marinette	NA	Northern	Male	1	5.5	5		25.5	11.6		1	Dogs	Dogs	0.0502	1688
637	637	1987	5	25	NA	Marinette	NA	Northern	Male	1	4.5	4		22.1	10		0	Trapped	Trapped	0.0502	1688
638	638	1987	5	25	NA	Marinette	NA	Northern	Male	1	3.5	3					0	Trapped	Trapped	0.0502	1688
639	639	1987	5	25	NA	Marinette	NA	Northern	Male	1	3.5	3		21.7	9.8		0	Trapped	Trapped	0.0502	1688
640	640	1987	5	25	NA	Marinette	NA	Northern	Female	0	3.5	3	3	16.9	7.7		0	Trapped	Trapped	0.0502	1688
641	641	1987	5	25	NA	Marinette	NA	Northern	Male	1	2.5	2		24.7	11.2		0	Trapped	Trapped	0.0502	1688
642	642	1987	5	25	NA	Washburn	NA	Northern	Male	1	0.5	0		12.4	5.6		1	Dogs	Dogs	0.0502	1688
643	643	1987	5	25	NA	Washburn	NA	Northern	Male	1	1.5	1		25.4	11.5		1	Dogs	Dogs	0.0502	1688
644	644	1987	5	25	NA	Marinette	NA	Northern	Female	0	2.5	2	0	15.2	6.9		0	Trapped	Trapped	0.0502	1688
645	645	1987	5	25	NA	Marinette	NA	Northern	Female	0	2.5	2	4	14.2	6.4		0	Trapped	Trapped	0.0502	1688
646	646	1987	5	25	NA	Marinette	NA	Northern	Female	0	2.5	2	5	14.1	6.4		0	Trapped	Trapped	0.0502	1688
647	647	1987	5	25	NA	Marinette	NA	Northern	Male	1	1.5	1					1	Dogs	Dogs	0.0502	1688
648	648	1987	5	25	NA	Marinette	NA	Northern	Male	1	1.5	1					1	Dogs	Dogs	0.0502	1688
649	649	1987	5	25	NA	Marinette	NA	Northern	Male	1	1.5	1					0	Trapped	Trapped	0.0502	1688
650	650	1987	5	25	NA	Marinette	NA	Northern	Male	1	1.5	1		15.1	6.8		1	Dogs	Dogs	0.0502	1688
651	651	1987	5	25	NA	Marinette	NA	Northern	Male	1	1.5	1		16.5	7.5		0	Trapped	Trapped	0.0502	1688
652	652	1987	5	25	NA	Marinette	NA	Northern	Male	1	1.5	1		19.3	8.8		0	Trapped	Trapped	0.0502	1688
653	653	1987	5	25	NA	Marinette	NA	Northern	Female	0	1.5	1	0	12.6	5.7		0	Trapped	Trapped	0.0502	1688
654	654	1987	5	25	NA	Marinette	NA	Northern	Female	0	1.5	1	0	14.3	6.5		0	Trapped	Trapped	0.0502	1688
655	655	1987	5	25	NA	Marinette	NA	Northern	Female	0	1.5	1	0	17.5	7.9		0	Trapped	Trapped	0.0502	1688
656	656	1987	5	25	NA	Marinette	NA	Northern	Female	0	1.5	1	0	18.4	8.3		0	Trapped	Trapped	0.0502	1688
657	657	1987	5	25	NA	Marinette	NA	Northern	Male	1	0.5	0					0	Trapped	Trapped	0.0502	1688
658	658	1987	5	25	NA	Marinette	NA	Northern	Male	1	0.5	0		11.2	5.1		1	Dogs	Dogs	0.0502	1688
659	659	1987	5	25	NA	Marinette	NA	Northern	Male	1	0.5	0		13.4	6.1		1	Dogs	Dogs	0.0502	1688
660	660	1987	5	25	NA	Marinette	NA	Northern	Female	0	0.5	0	0	6.9	3.1		1	Dogs	Dogs	0.0502	1688
661	661	1987	5	25	NA	Marinette	NA	Northern	Female	0	0.5	0	0	8.4	3.8		0	Trapped	Trapped	0.0502	1688
662	662	1987	5	25	NA	Marinette	NA	Northern	Female	0	0.5	0	0	8.7	3.9		0	Trapped	Trapped	0.0502	1688
663	663	1987	5	25	NA	Lincoln	NA	Northern	Female	0	6.5	6	2	18.7	8.5		0	Trapped	Trapped	0.0502	1688
664	664	1987	5	25	NA	Lincoln	NA	Northern	Male	1	5.5	5		30.5	13.8		1	Dogs	Dogs	0.0502	1688
665	665	1987	5	25	NA	Lincoln	NA	Northern	Male	1	3.5	3		31.8	14.4		1	Dogs	Dogs	0.0502	1688
666	666	1987	5	25	NA	Lincoln	NA	Northern	Male	1	2.5	2		23.6	10.7		1	Dogs	Dogs	0.0502	1688
667	667	1987	5	25	NA	Lincoln	NA	Northern	Male	1	2.5	2		28.7	13		1	Dogs	Dogs	0.0502	1688
668	668	1987	5	25	NA	Lincoln	NA	Northern	Male	1	2.5	2		32.2	14.6		1	Dogs	Dogs	0.0502	1688
669	669	1987	5	25	NA	Lincoln	NA	Northern	Female	0	2.5	2	5				0	Trapped	Trapped	0.0502	1688
670	670	1987	5	25	NA	Lincoln	NA	Northern	Male	1	1.5	1		17.8	8.1		1	Dogs	Dogs	0.0502	1688
671	671	1987	5	25	NA	Lincoln	NA	Northern	Male	1	1.5	1		18.5	8.4		1	Dogs	Dogs	0.0502	1688
672	672	1987	5	25	NA	Lincoln	NA	Northern	Male	1	1.5	1		24.8	11.2		0	Trapped	Trapped	0.0502	1688
673	673	1987	5	25	NA	Lincoln	NA	Northern	Male	1	0.5	0		13.5	6.1		1	Dogs	Dogs	0.0502	1688
674	674	1987	5	25	NA	Lincoln	NA	Northern	Male	1	0.5	0		16.7	7.6		1	Dogs	Dogs	0.0502	1688
675	675	1987	5	25	NA	Lincoln	NA	Northern	Female	0	0.5	0	0				1	Dogs	Dogs	0.0502	1688
676	676	1987	5	25	NA	Lincoln	NA	Northern	Female	0	0.5	0	0	7.8	3.5		1	Dogs	Dogs	0.0502	1688
677	677	1987	5	25	NA	Lincoln	NA	Northern	Female	0	0.5	0	0	9.8	4.4		NA	NA	Other	0.0502	1688
678	678	1987	5	25	NA	Lincoln	NA	Northern	Female	0	0.5	0	0	10.5	4.8		0	Trapped	Trapped	0.0502	1688
679	679	1987	5	25	NA	Langlade	NA	Northern	Female	0	5.5	5	3	17.5	7.9		1	Dogs	Dogs	0.0502	1688
680	680	1987	5	25	NA	Langlade	NA	Northern	Female	0	2.5	2	3	14.5	6.6		0	Trapped	Trapped	0.0502	1688
681	681	1987	5	25	NA	Langlade	NA	Northern	Female	0	2.5	2	2	14.4	6.5		0	Trapped	Trapped	0.0502	1688
682	682	1987	5	25	NA	Langlade	NA	Northern	Female	0	2.5	2		14.1	6.4		1	Dogs	Dogs	0.0502	1688
683	683	1987	5	25	NA	Langlade	NA	Northern	Male	1	1.5	1					1	Dogs	Dogs	0.0502	1688
684	684	1987	5	25	NA	Langlade	NA	Northern	Male	1	0.5	0		12.1	5.5		0	Trapped	Trapped	0.0502	1688
685	685	1987	5	25	NA	Langlade	NA	Northern	Male	1	NA	NA					NA	NA	Other	0.0502	1688
686	686	1987	5	25	NA	Iron	NA	Northern	Female	0	2.5	2	3	17.2	7.8		0	Trapped	Trapped	0.0502	1688
687	687	1987	5	25	NA	Iron	NA	Northern	Male	1	1.5	1					1	Dogs	Dogs	0.0502	1688
688	688	1987	5	25	NA	Forest	NA	Northern	Female	0	5.5	5	2	18.3	8.3		NA	NA	Other	0.0502	1688
689	689	1987	5	25	NA	Forest	NA	Northern	Male	1	2.5	2		24.2	11		0	Trapped	Trapped	0.0502	1688
690	690	1987	5	25	NA	Forest	NA	Northern	Male	1	2.5	2		27.4	12.4		NA	NA	Other	0.0502	1688
691	691	1987	5	25	NA	Forest	NA	Northern	Male	1	2.5	2		31.5	14.3		1	Dogs	Dogs	0.0502	1688
692	692	1987	5	25	NA	Forest	NA	Northern	Female	0	2.5	2	0				1	Dogs	Dogs	0.0502	1688
693	693	1987	5	25	NA	Forest	NA	Northern	Female	0	1.5	1	0				0	Trapped	Trapped	0.0502	1688
694	694	1987	5	25	NA	Forest	NA	Northern	Female	0	1.5	1	1	10.5	4.8		0	Trapped	Trapped	0.0502	1688
695	695	1987	5	25	NA	Forest	NA	Northern	Female	0	1.5	1	0	13.3	6		0	Trapped	Trapped	0.0502	1688
696	696	1987	5	25	NA	Florence	NA	Northern	Male	1	2.5	2					0	Trapped	Trapped	0.0502	1688
697	697	1987	5	25	NA	Florence	NA	Northern	Male	1	2.5	2		24.4	11.1		0	Trapped	Trapped	0.0502	1688
698	698	1987	5	25	NA	Florence	NA	Northern	Male	1	1.5	1		21.5	9.8		0	Trapped	Trapped	0.0502	1688
699	699	1987	5	25	NA	Florence	NA	Northern	Male	1	0.5	0		7.6	3.4		0	Trapped	Trapped	0.0502	1688
700	700	1987	5	25	NA	Florence	NA	Northern	Female	0	0.5	0	0				1	Dogs	Dogs	0.0502	1688
701	701	1987	5	25	NA	Florence	NA	Northern	Female	0	0.5	0	0				NA	NA	Other	0.0502	1688
702	702	1987	5	25	NA	Douglas	NA	Northern	Male	1	7.5	7					0	Trapped	Trapped	0.0502	1688
703	703	1987	5	25	NA	Douglas	NA	Northern	Male	1	6.5	6		30.5	13.8		1	Dogs	Dogs	0.0502	1688
704	704	1987	5	25	NA	Douglas	NA	Northern	Male	1	3.5	3		20.4	9.3		0	Trapped	Trapped	0.0502	1688
705	705	1987	5	25	NA	Douglas	NA	Northern	Male	1	3.5	3		26.7	12.1		0	Trapped	Trapped	0.0502	1688
706	706	1987	5	25	NA	Douglas	NA	Northern	Female	0	3.5	3	4				0	Trapped	Trapped	0.0502	1688
707	707	1987	5	25	NA	Douglas	NA	Northern	Male	1	2.5	2		20.4	9.3		0	Trapped	Trapped	0.0502	1688
708	708	1987	5	25	NA	Douglas	NA	Northern	Female	0	1.5	1	2	13.8	6.3		0	Trapped	Trapped	0.0502	1688
709	709	1987	5	25	NA	Douglas	NA	Northern	Female	0	1.5	1	1	12.5	5.7		0	Trapped	Trapped	0.0502	1688
710	710	1987	5	25	NA	Chippewa	NA	Northern	Male	1	3.5	3		24.7	11.2		0	Trapped	Trapped	0.0502	1688
711	711	1987	5	25	NA	Chippewa	NA	Northern	Female	0	3.5	3	3				1	Dogs	Dogs	0.0502	1688
712	712	1987	5	25	NA	Chippewa	NA	Northern	Male	1	2.5	2		26.4	12		1	Dogs	Dogs	0.0502	1688
713	713	1987	5	25	NA	Douglas	NA	Northern	Female	0	9.5	9	3				1	Dogs	Dogs	0.0502	1688
714	714	1987	5	25	NA	Florence	NA	Northern	Female	0	1.5	1	0	13.3	6		0	Trapped	Trapped	0.0502	1688
715	715	1987	5	25	NA	Chippewa	NA	Northern	Male	1	1.5	1		21.5	9.8		1	Dogs	Dogs	0.0502	1688
716	716	1987	5	25	NA	Chippewa	NA	Northern	Female	0	1.5	1	0	14.1	6.4		0	Trapped	Trapped	0.0502	1688
717	717	1987	5	25	NA	Burnett	NA	Northern	Male	1	6.5	6					0	Trapped	Trapped	0.0502	1688
718	718	1987	5	25	NA	Burnett	NA	Northern	Female	0	4.5	4	1	19.8	9		1	Dogs	Dogs	0.0502	1688
719	719	1987	5	25	NA	Burnett	NA	Northern	Female	0	4.5	4	3	15.1	6.8		1	Dogs	Dogs	0.0502	1688
720	720	1987	5	25	NA	Burnett	NA	Northern	Male	1	3.5	3					1	Dogs	Dogs	0.0502	1688
721	721	1987	5	25	NA	Burnett	NA	Northern	Female	0	3.5	3	0	15.4	7		1	Dogs	Dogs	0.0502	1688
722	722	1987	5	25	NA	Burnett	NA	Northern	Male	1	2.5	2		23.7	10.8		1	Dogs	Dogs	0.0502	1688
723	723	1987	5	25	NA	Forest	NA	Northern	Female	0	2.5	2	0	13.6	6.2		0	Trapped	Trapped	0.0502	1688
724	724	1987	5	25	NA	Forest	NA	Northern	Male	1	3.5	3		23.3	10.6		0	Trapped	Trapped	0.0502	1688
725	725	1987	5	25	NA	Burnett	NA	Northern	Male	1	1.5	1					1	Dogs	Dogs	0.0502	1688
726	726	1987	5	25	NA	Burnett	NA	Northern	Male	1	1.5	1		19.2	8.7		1	Dogs	Dogs	0.0502	1688
727	727	1987	5	25	NA	Burnett	NA	Northern	Male	1	1.5	1		28.6	13		1	Dogs	Dogs	0.0502	1688
728	728	1987	5	25	NA	Burnett	NA	Northern	Female	0	1.5	1	0	13.9	6.3		1	Dogs	Dogs	0.0502	1688
729	729	1987	5	25	NA	Langlade	NA	Northern	NA	NA	NA	NA					NA	NA	Other	0.0502	1688
730	730	1987	5	25	NA	Burnett	NA	Northern	Male	1	0.5	0		7.4	3.4		NA	NA	Other	0.0502	1688
731	731	1987	5	25	NA	Burnett	NA	Northern	Male	1	0.5	0		13.3	6		0	Trapped	Trapped	0.0502	1688
732	732	1987	5	25	NA	Burnett	NA	Northern	Female	0	0.5	0	0				1	Dogs	Dogs	0.0502	1688
733	733	1987	5	25	NA	Burnett	NA	Northern	Female	0	0.5	0	0	10.6	4.8		1	Dogs	Dogs	0.0502	1688
734	734	1987	5	25	NA	Burnett	NA	Northern	Female	0	0.5	0	0	11.2	5.1		1	Dogs	Dogs	0.0502	1688
735	735	1987	5	25	NA	Bayfield	NA	Northern	Male	1	4.5	4		28.2	12.8		1	Dogs	Dogs	0.0502	1688
736	736	1987	5	25	NA	Bayfield	NA	Northern	Male	1	0.5	0		12.1	5.5		0	Trapped	Trapped	0.0502	1688
737	737	1987	5	25	NA	Bayfield	NA	Northern	Male	1	0.5	0		13.9	6.3		0	Trapped	Trapped	0.0502	1688
738	738	1987	5	25	NA	Lincoln	NA	Northern	Female	0	0.5	0	0	11.5	5.2		0	Trapped	Trapped	0.0502	1688
739	739	1987	5	25	NA	Unknown	NA	Northern	Female	0	10.5	10	3	18.8	8.5		NA	NA	NA	0.0502	1688
740	740	1987	5	25	NA	Unknown	NA	Northern	Female	0	6.5	6	0	16.5	7.5		NA	NA	NA	0.0502	1688
741	741	1987	5	25	NA	Unknown	NA	Northern	Male	1	3.5	3		12.1	5.5		NA	NA	NA	0.0502	1688
742	742	1987	5	25	NA	Unknown	NA	Northern	Male	1	3.5	3		22.8	10.3		NA	NA	NA	0.0502	1688
743	743	1987	5	25	NA	Lincoln	NA	Northern	Female	0	0.5	0	0	12.3	5.6		1	Dogs	Dogs	0.0502	1688
744	744	1987	5	25	NA	Lincoln	NA	Northern	Male	1	0.5	0		18.2	8.3		1	Dogs	Dogs	0.0502	1688
745	745	1987	5	25	NA	Unknown	NA	Northern	Male	1	3.5	3		23.5	10.7		NA	NA	NA	0.0502	1688
746	746	1987	5	25	NA	Unknown	NA	Northern	Female	0	2.5	2	2	18.2	8.3		NA	NA	NA	0.0502	1688
747	747	1987	5	25	NA	Unknown	NA	Northern	Female	0	2.5	2	0	14.7	6.7		NA	NA	NA	0.0502	1688
748	748	1987	5	25	NA	Unknown	NA	Northern	Male	1	1.5	1					NA	NA	NA	0.0502	1688
749	749	1987	5	25	NA	Unknown	NA	Northern	Male	1	1.5	1					NA	NA	NA	0.0502	1688
750	750	1987	5	25	NA	Unknown	NA	Northern	Male	1	1.5	1					NA	NA	Other	0.0502	1688
751	751	1987	5	25	NA	Unknown	NA	Northern	Male	1	1.5	1		17.5	7.9		NA	NA	NA	0.0502	1688
752	752	1987	5	25	NA	Unknown	NA	Northern	Female	0	1.5	1	3	13.1	5.9		NA	NA	NA	0.0502	1688
753	753	1987	5	25	NA	Lincoln	NA	Northern	Female	0	3.5	3	2	18.3	8.3		1	Dogs	Dogs	0.0502	1688
754	754	1987	5	25	NA	Unknown	NA	Northern	Female	0	1.5	1	3	13.5	6.1		NA	NA	NA	0.0502	1688
755	755	1987	5	25	NA	Unknown	NA	Northern	Female	0	1.5	1	3	15.5	7		NA	NA	NA	0.0502	1688
756	756	1987	5	25	NA	Unknown	NA	Northern	NA	NA	1.5	1					NA	NA	NA	0.0502	1688
757	757	1987	5	25	NA	Unknown	NA	Northern	Male	1	0.5	0					NA	NA	NA	0.0502	1688
758	758	1987	5	25	NA	Marinette	NA	Northern	Female	0	0.5	0	0	8.9	4		NA	NA	Other	0.0502	1688
759	759	1987	5	25	NA	Unknown	NA	Northern	Male	1	0.5	0		8.1	3.7		NA	NA	NA	0.0502	1688
760	760	1987	5	25	NA	Unknown	NA	Northern	Male	1	0.5	0		10.4	4.7		NA	NA	NA	0.0502	1688
761	761	1987	5	25	NA	Unknown	NA	Northern	Male	1	0.5	0		10.6	4.8		NA	NA	NA	0.0502	1688
762	762	1987	5	25	NA	Unknown	NA	Northern	Male	1	0.5	0		11.4	5.2		NA	NA	NA	0.0502	1688
763	763	1987	5	25	NA	Marinette	NA	Northern	Female	0	0.5	0	0	12.3	5.6		1	Dogs	Dogs	0.0502	1688
764	764	1987	5	25	NA	Unknown	NA	Northern	Male	1	0.5	0		13.6	6.2		NA	NA	NA	0.0502	1688
765	765	1987	5	25	NA	Unknown	NA	Northern	Male	1	0.5	0		18.9	8.6		NA	NA	NA	0.0502	1688
766	766	1987	5	25	NA	Unknown	NA	Northern	Male	1	0.5	0		22.1	10		NA	NA	NA	0.0502	1688
767	767	1987	5	25	NA	Unknown	NA	Northern	Female	0	0.5	0	1	18.8	8.5		NA	NA	NA	0.0502	1688
768	768	1987	5	25	NA	Unknown	NA	Northern	Female	0	0.5	0	0	8.4	3.8		NA	NA	NA	0.0502	1688
769	769	1987	5	25	NA	Unknown	NA	Northern	Female	0	0.5	0	0	10.8	4.9		NA	NA	NA	0.0502	1688
770	770	1987	5	25	NA	Unknown	NA	Northern	Female	0	NA	NA		13.5	6.1		NA	NA	NA	0.0502	1688
771	771	1987	5	25	NA	Unknown	NA	Northern	Female	0	NA	NA	3				NA	NA	Other	0.0502	1688
772	772	1988	6	36	NA	Washburn	NA	Northern	Male	1	1.5	1					1	Dogs	Dogs	0.0363	1875
773	773	1988	6	36	NA	Washburn	NA	Northern	Male	1	1.5	1					1	Dogs	Dogs	0.0363	1875
774	774	1988	6	36	NA	Vilas	NA	Northern	Male	1	0.5	0		12.3	5.6		0	Trapped	Trapped	0.0363	1875
775	775	1988	6	36	NA	Taylor	NA	Northern	Female	0	0.5	0	0				1	Dogs	Dogs	0.0363	1875
776	776	1988	6	36	NA	Taylor	NA	Northern	Female	0	0.5	0	0				1	Dogs	Dogs	0.0363	1875
777	777	1988	6	36	NA	Taylor	NA	Northern	Female	0	0.5	0	0				1	Dogs	Dogs	0.0363	1875
778	778	1988	6	36	NA	Sawyer	NA	Northern	Male	1	4.5	4		22.5	10.2		1	Dogs	Dogs	0.0363	1875
779	779	1988	6	36	NA	Sawyer	NA	Northern	Male	1	2.5	2					1	Dogs	Dogs	0.0363	1875
780	780	1988	6	36	NA	Sawyer	NA	Northern	Female	0	2.5	2	3	13.5	6.1		0	Trapped	Trapped	0.0363	1875
781	781	1988	6	36	NA	Sawyer	NA	Northern	Male	1	0.5	0		10.2	4.6		1	Dogs	Dogs	0.0363	1875
782	782	1988	6	36	NA	Sawyer	NA	Northern	Female	0	0.5	0	0				0	Trapped	Trapped	0.0363	1875
783	783	1988	6	36	NA	Sawyer	NA	Northern	Female	0	0.5	0	0	10.5	4.8		1	Dogs	Dogs	0.0363	1875
784	784	1988	6	36	NA	Sawyer	NA	Northern	Female	0	NA	NA	1	17.5	7.9		0	Trapped	Trapped	0.0363	1875
785	785	1988	6	36	NA	Rusk	NA	Northern	Male	1	1.5	1					1	Dogs	Dogs	0.0363	1875
786	786	1988	6	36	NA	Rusk	NA	Northern	Male	1	1.5	1					1	Dogs	Dogs	0.0363	1875
787	787	1988	6	36	NA	Rusk	NA	Northern	Male	1	1.5	1					1	Dogs	Dogs	0.0363	1875
788	788	1988	6	36	NA	Rusk	NA	Northern	Male	1	1.5	1		20.4	9.3		0	Trapped	Trapped	0.0363	1875
789	789	1988	6	36	NA	Rusk	NA	Northern	Male	1	0.5	0		13.3	6		1	Dogs	Dogs	0.0363	1875
790	790	1988	6	36	NA	Rusk	NA	Northern	Female	0	0.5	0	0	9.8	4.4		1	Dogs	Dogs	0.0363	1875
791	791	1988	6	36	NA	Price	NA	Northern	Male	1	3.5	3		15.5	7		0	Trapped	Trapped	0.0363	1875
792	792	1988	6	36	NA	Price	NA	Northern	Female	0	3.5	3	0				0	Trapped	Trapped	0.0363	1875
793	793	1988	6	36	NA	Price	NA	Northern	Male	1	0.5	0		4.7	2.1		0	Trapped	Trapped	0.0363	1875
794	794	1988	6	36	NA	Price	NA	Northern	Male	1	0.5	0		10.8	4.9		1	Dogs	Dogs	0.0363	1875
795	795	1988	6	36	NA	Price	NA	Northern	Male	1	0.5	0		12.1	5.5		0	Trapped	Trapped	0.0363	1875
796	796	1988	6	36	NA	Price	NA	Northern	Female	0	0.5	0	0				0	Trapped	Trapped	0.0363	1875
797	797	1988	6	36	NA	Price	NA	Northern	Female	0	0.5	0	0	10.5	4.8		NA	NA	Other	0.0363	1875
798	798	1988	6	36	NA	Oneida	NA	Northern	Female	0	3.5	3	3	20.5	9.3		1	Dogs	Dogs	0.0363	1875
799	799	1988	6	36	NA	Oneida	NA	Northern	Female	0	3.5	3	4	19.5	8.8		1	Dogs	Dogs	0.0363	1875
800	800	1988	6	36	NA	Oneida	NA	Northern	Male	1	2.5	2					1	Dogs	Dogs	0.0363	1875
801	801	1988	6	36	NA	Oneida	NA	Northern	Male	1	2.5	2					0	Trapped	Trapped	0.0363	1875
802	802	1988	6	36	NA	Oneida	NA	Northern	Male	1	1.5	1		24.8	11.2		NA	NA	Other	0.0363	1875
803	803	1988	6	36	NA	Oneida	NA	Northern	Female	0	1.5	1	4	14.5	6.6		1	Dogs	Dogs	0.0363	1875
804	804	1988	6	36	NA	Oneida	NA	Northern	Male	1	0.5	0					1	Dogs	Dogs	0.0363	1875
805	805	1988	6	36	NA	Oneida	NA	Northern	Male	1	0.5	0		13.5	6.1		1	Dogs	Dogs	0.0363	1875
806	806	1988	6	36	NA	Oneida	NA	Northern	Male	1	0.5	0		13.6	6.2		1	Dogs	Dogs	0.0363	1875
807	807	1988	6	36	NA	Oneida	NA	Northern	Female	0	0.5	0	0	10.3	4.7		1	Dogs	Dogs	0.0363	1875
808	808	1988	6	36	NA	Oneida	NA	Northern	Male	1	NA	NA		21.7	9.8		1	Dogs	Dogs	0.0363	1875
809	809	1988	6	36	NA	Oneida	NA	Northern	Female	0	NA	NA	1	10.7	4.9		0	Trapped	Trapped	0.0363	1875
810	810	1988	6	36	NA	Oconto	NA	Northern	Female	0	3.5	3	3				1	Dogs	Dogs	0.0363	1875
811	811	1988	6	36	NA	Oconto	NA	Northern	Female	0	1.5	1	3	17.5	7.9		1	Dogs	Dogs	0.0363	1875
812	812	1988	6	36	NA	Oconto	NA	Northern	Female	0	0.5	0	0	11.7	5.3		1	Dogs	Dogs	0.0363	1875
813	813	1988	6	36	NA	Marinette	NA	Northern	Male	1	4.5	4					1	Dogs	Dogs	0.0363	1875
814	814	1988	6	36	NA	Marinette	NA	Northern	Male	1	2.5	2					1	Dogs	Dogs	0.0363	1875
815	815	1988	6	36	NA	Marinette	NA	Northern	Female	0	2.5	2	3	21.7	9.8		0	Trapped	Trapped	0.0363	1875
816	816	1988	6	36	NA	Marinette	NA	Northern	Male	1	1.5	1		23.5	10.7		NA	NA	Other	0.0363	1875
817	817	1988	6	36	NA	Marinette	NA	Northern	Male	1	1.5	1		23.6	10.7		1	Dogs	Dogs	0.0363	1875
818	818	1988	6	36	NA	Marinette	NA	Northern	Female	0	1.5	1	0	5.4	2.4		1	Dogs	Dogs	0.0363	1875
819	819	1988	6	36	NA	Marinette	NA	Northern	Female	0	1.5	1	4				0	Trapped	Trapped	0.0363	1875
820	820	1988	6	36	NA	Marinette	NA	Northern	Female	0	1.5	1	3	11.8	5.4		1	Dogs	Dogs	0.0363	1875
821	821	1988	6	36	NA	Marinette	NA	Northern	Female	0	1.5	1	0	20.5	9.3		NA	NA	Other	0.0363	1875
822	822	1988	6	36	NA	Marinette	NA	Northern	Female	0	1.5	1	4	18.2	8.3		NA	NA	Other	0.0363	1875
823	823	1988	6	36	NA	Marinette	NA	Northern	Male	1	0.5	0		14.5	6.6		1	Dogs	Dogs	0.0363	1875
824	824	1988	6	36	NA	Marinette	NA	Northern	Female	0	0.5	0	0				1	Dogs	Dogs	0.0363	1875
825	825	1988	6	36	NA	Marinette	NA	Northern	Female	0	0.5	0	0				0	Trapped	Trapped	0.0363	1875
826	826	1988	6	36	NA	Marinette	NA	Northern	Female	0	0.5	0	0	6.3	2.9		0	Trapped	Trapped	0.0363	1875
827	827	1988	6	36	NA	Marinette	NA	Northern	Female	0	NA	NA	3				0	Trapped	Trapped	0.0363	1875
828	828	1988	6	36	NA	Lincoln	NA	Northern	Female	0	7.5	7	3	21.2	9.6		1	Dogs	Dogs	0.0363	1875
829	829	1988	6	36	NA	Lincoln	NA	Northern	Male	1	3.5	3		26.8	12.2		1	Dogs	Dogs	0.0363	1875
830	830	1988	6	36	NA	Marinette	NA	Northern	Male	1	NA	NA		11.5	5.2		1	Dogs	Dogs	0.0363	1875
831	831	1988	6	36	NA	Lincoln	NA	Northern	Female	0	3.5	3	2	17.5	7.9		0	Trapped	Trapped	0.0363	1875
832	832	1988	6	36	NA	Lincoln	NA	Northern	Male	1	1.5	1		24.7	11.2		1	Dogs	Dogs	0.0363	1875
833	833	1988	6	36	NA	Marinette	NA	Northern	Female	0	0.5	0	0	7.2	3.3		0	Trapped	Trapped	0.0363	1875
834	834	1988	6	36	NA	Lincoln	NA	Northern	Female	0	1.5	1	0	17.7	8		1	Dogs	Dogs	0.0363	1875
835	835	1988	6	36	NA	Lincoln	NA	Northern	Female	0	0.5	0	0				1	Dogs	Dogs	0.0363	1875
836	836	1988	6	36	NA	Lincoln	NA	Northern	Female	0	0.5	0	0	9.5	4.3		1	Dogs	Dogs	0.0363	1875
837	837	1988	6	36	NA	Langlade	NA	Northern	Female	0	10.5	10	3	19.4	8.8		0	Trapped	Trapped	0.0363	1875
838	838	1988	6	36	NA	Langlade	NA	Northern	Male	1	9.5	9					1	Dogs	Dogs	0.0363	1875
839	839	1988	6	36	NA	Langlade	NA	Northern	Male	1	5.5	5		27.3	12.4		1	Dogs	Dogs	0.0363	1875
840	840	1988	6	36	NA	Marinette	NA	Northern	Male	1	1.5	1		29.3	13.3		1	Dogs	Dogs	0.0363	1875
841	841	1988	6	36	NA	Langlade	NA	Northern	Male	1	0.5	0		8.8	4		1	Dogs	Dogs	0.0363	1875
842	842	1988	6	36	NA	Langlade	NA	Northern	Male	1	0.5	0		11.6	5.3		1	Dogs	Dogs	0.0363	1875
843	843	1988	6	36	NA	Langlade	NA	Northern	Male	1	0.5	0		12.8	5.8		1	Dogs	Dogs	0.0363	1875
844	844	1988	6	36	NA	Langlade	NA	Northern	Male	1	0.5	0		13.3	6		1	Dogs	Dogs	0.0363	1875
845	845	1988	6	36	NA	Marinette	NA	Northern	Male	1	4.5	4					0	Trapped	Trapped	0.0363	1875
846	846	1988	6	36	NA	Langlade	NA	Northern	Female	0	0.5	0	0	7.7	3.5		0	Trapped	Trapped	0.0363	1875
847	847	1988	6	36	NA	Forest	NA	Northern	Female	0	8.5	8	2	17.4	7.9		NA	NA	Other	0.0363	1875
848	848	1988	6	36	NA	Forest	NA	Northern	Male	1	3.5	3		27.4	12.4		0	Trapped	Trapped	0.0363	1875
849	849	1988	6	36	NA	Forest	NA	Northern	Male	1	1.5	1					1	Dogs	Dogs	0.0363	1875
850	850	1988	6	36	NA	Oconto	NA	Northern	Male	1	2.5	2		28.7	13		1	Dogs	Dogs	0.0363	1875
851	851	1988	6	36	NA	Forest	NA	Northern	Female	0	1.5	1	3	15.4	7		1	Dogs	Dogs	0.0363	1875
852	852	1988	6	36	NA	Forest	NA	Northern	Female	0	0.5	0	0	7.9	3.6		0	Trapped	Trapped	0.0363	1875
853	853	1988	6	36	NA	Forest	NA	Northern	Female	0	0.5	0	0	8.2	3.7		NA	NA	Other	0.0363	1875
854	854	1988	6	36	NA	Florence	NA	Northern	Female	0	2.5	2	2	9.7	4.4		0	Trapped	Trapped	0.0363	1875
855	855	1988	6	36	NA	Florence	NA	Northern	Female	0	1.5	1	0	13.8	6.3		0	Trapped	Trapped	0.0363	1875
856	856	1988	6	36	NA	Douglas	NA	Northern	Male	1	8.5	8		26.6	12.1		1	Dogs	Dogs	0.0363	1875
857	857	1988	6	36	NA	Douglas	NA	Northern	Male	1	7.5	7					1	Dogs	Dogs	0.0363	1875
858	858	1988	6	36	NA	Douglas	NA	Northern	Male	1	3.5	3		19.6	8.9		0	Trapped	Trapped	0.0363	1875
859	859	1988	6	36	NA	Oneida	NA	Northern	Female	0	1.5	1	0	6.7	3		1	Dogs	Dogs	0.0363	1875
860	860	1988	6	36	NA	Oneida	NA	Northern	Male	1	2.5	2		21.5	9.8		0	Trapped	Trapped	0.0363	1875
861	861	1988	6	36	NA	Douglas	NA	Northern	Male	1	1.5	1					1	Dogs	Dogs	0.0363	1875
862	862	1988	6	36	NA	Douglas	NA	Northern	Male	1	1.5	1					1	Dogs	Dogs	0.0363	1875
863	863	1988	6	36	NA	Douglas	NA	Northern	Male	1	1.5	1					1	Dogs	Dogs	0.0363	1875
864	864	1988	6	36	NA	Douglas	NA	Northern	Male	1	1.5	1		22.7	10.3		0	Trapped	Trapped	0.0363	1875
865	865	1988	6	36	NA	Price	NA	Northern	Female	0	NA	NA		16.3	7.4		1	Dogs	Dogs	0.0363	1875
866	866	1988	6	36	NA	Douglas	NA	Northern	Female	0	1.5	1	4	13.4	6.1		1	Dogs	Dogs	0.0363	1875
867	867	1988	6	36	NA	Douglas	NA	Northern	Female	0	1.5	1	4	18.6	8.4		0	Trapped	Trapped	0.0363	1875
868	868	1988	6	36	NA	Douglas	NA	Northern	Female	0	1.5	1	3	12.2	5.5		0	Trapped	Trapped	0.0363	1875
869	869	1988	6	36	NA	Douglas	NA	Northern	Female	0	1.5	1	3	12.4	5.6		0	Trapped	Trapped	0.0363	1875
870	870	1988	6	36	NA	Douglas	NA	Northern	Male	1	0.5	0		8.6	3.9		0	Trapped	Trapped	0.0363	1875
871	871	1988	6	36	NA	Douglas	NA	Northern	Male	1	0.5	0		9.3	4.2		1	Dogs	Dogs	0.0363	1875
872	872	1988	6	36	NA	Douglas	NA	Northern	Male	1	0.5	0		10.9	4.9		1	Dogs	Dogs	0.0363	1875
873	873	1988	6	36	NA	Douglas	NA	Northern	Female	0	0.5	0					1	Dogs	Dogs	0.0363	1875
874	874	1988	6	36	NA	Price	NA	Northern	Female	0	7.5	7	2				0	Trapped	Trapped	0.0363	1875
875	875	1988	6	36	NA	Douglas	NA	Northern	Male	1	NA	NA		14.3	6.5		1	Dogs	Dogs	0.0363	1875
876	876	1988	6	36	NA	Chippewa	NA	Northern	Male	1	1.5	1					1	Dogs	Dogs	0.0363	1875
877	877	1988	6	36	NA	Burnett	NA	Northern	Male	1	1.5	1					1	Dogs	Dogs	0.0363	1875
878	878	1988	6	36	NA	Burnett	NA	Northern	Male	1	0.5	0					NA	NA	Other	0.0363	1875
879	879	1988	6	36	NA	Rusk	NA	Northern	Male	1	1.5	1		20.7	9.4		1	Dogs	Dogs	0.0363	1875
880	880	1988	6	36	NA	Rusk	NA	Northern	Female	0	4.5	4	2	19.5	8.8		1	Dogs	Dogs	0.0363	1875
881	881	1988	6	36	NA	Burnett	NA	Northern	Female	0	0.5	0	0	9.1	4.1		1	Dogs	Dogs	0.0363	1875
882	882	1988	6	36	NA	Burnett	NA	Northern	Female	0	NA	NA	0				1	Dogs	Dogs	0.0363	1875
883	883	1988	6	36	NA	Bayfield	NA	Northern	Female	0	5.5	5					0	Trapped	Trapped	0.0363	1875
884	884	1988	6	36	NA	Bayfield	NA	Northern	Male	1	3.5	3		30.5	13.8		1	Dogs	Dogs	0.0363	1875
885	885	1988	6	36	NA	Bayfield	NA	Northern	Male	1	2.5	2					1	Dogs	Dogs	0.0363	1875
886	886	1988	6	36	NA	Barron	NA	Northern	Male	1	4.5	4					NA	NA	NA	0.0363	1875
887	887	1988	6	36	NA	Barron	NA	Northern	Male	1	2.5	2					1	Dogs	Dogs	0.0363	1875
888	888	1988	6	36	NA	Barron	NA	Northern	Male	1	0.5	0					1	Dogs	Dogs	0.0363	1875
889	889	1988	6	36	NA	Sawyer	NA	Northern	Male	1	11.5	11		26.5	12		1	Dogs	Dogs	0.0363	1875
890	890	1988	6	36	NA	Ashland	NA	Northern	Female	0	7.5	7	4	23.5	10.7		1	Dogs	Dogs	0.0363	1875
891	891	1988	6	36	NA	Unknown	NA	Northern	Male	1	5.5	5		29.5	13.4		NA	NA	NA	0.0363	1875
892	892	1988	6	36	NA	Unknown	NA	Northern	Male	1	5.5	5		29.7	13.5		NA	NA	NA	0.0363	1875
893	893	1988	6	36	NA	Unknown	NA	Northern	Female	0	3.5	3	5	12.4	5.6		NA	NA	NA	0.0363	1875
894	894	1988	6	36	NA	Taylor	NA	Northern	Male	1	4.5	4					1	Dogs	Dogs	0.0363	1875
895	895	1988	6	36	NA	Unknown	NA	Northern	Male	1	2.5	2		27.7	12.6		1	Dogs	Dogs	0.0363	1875
896	896	1988	6	36	NA	Unknown	NA	Northern	Female	0	2.5	2	3	16.5	7.5		NA	NA	NA	0.0363	1875
897	897	1988	6	36	NA	Unknown	NA	Northern	Male	1	1.5	1		21.8	9.9		NA	NA	NA	0.0363	1875
898	898	1988	6	36	NA	Unknown	NA	Northern	Male	1	1.5	1		21.9	9.9		NA	NA	NA	0.0363	1875
899	899	1988	6	36	NA	Washburn	NA	Northern	Male	1	7.5	7		26.8	12.2		1	Dogs	Dogs	0.0363	1875
900	900	1988	6	36	NA	Unknown	NA	Northern	Female	0	1.5	1	3				0	Trapped	Trapped	0.0363	1875
901	901	1988	6	36	NA	Unknown	NA	Northern	Female	0	1.5	1	3	13.6	6.2		NA	NA	NA	0.0363	1875
902	902	1988	6	36	NA	Unknown	NA	Northern	Female	0	1.5	1	3	16.2	7.3		NA	NA	NA	0.0363	1875
903	903	1988	6	36	NA	Unknown	NA	Northern	Female	0	0.5	0	0				1	Dogs	Dogs	0.0363	1875
904	904	1988	6	36	NA	Unknown	NA	Northern	Female	0	0.5	0	0	6.9	3.1		NA	NA	NA	0.0363	1875
905	905	1988	6	36	NA	Unknown	NA	Northern	Female	0	0.5	0					NA	NA	NA	0.0363	1875
906	906	1988	6	36	NA	Unknown	NA	Northern	Female	0	0.5	0	0	9.3	4.2		1	Dogs	Dogs	0.0363	1875
907	907	1988	6	36	NA	Unknown	NA	Northern	Female	0	NA	NA	0	11.5	5.2		NA	NA	NA	0.0363	1875
908	908	1989	7	49	NA	Washburn	NA	Northern	Male	1	3.5	3					1	Dogs	Dogs	0.024	1929
909	909	1989	7	49	NA	Washburn	NA	Northern	Male	1	2.5	2					0	Trapped	Trapped	0.024	1929
910	910	1989	7	49	NA	Washburn	NA	Northern	Female	0	2.5	2	0	10.2	4.6		1	Dogs	Dogs	0.024	1929
911	911	1989	7	49	NA	Washburn	NA	Northern	Male	1	0.5	0					0	Trapped	Trapped	0.024	1929
912	912	1989	7	49	NA	Taylor	NA	Northern	Male	1	2.5	2		23.2	10.5		1	Dogs	Dogs	0.024	1929
913	913	1989	7	49	NA	Taylor	NA	Northern	Male	1	1.5	1					1	Dogs	Dogs	0.024	1929
914	914	1989	7	49	NA	Sawyer	NA	Northern	Male	1	1.5	1					1	Dogs	Dogs	0.024	1929
915	915	1989	7	49	NA	Sawyer	NA	Northern	Male	1	0.5	0		11.4	5.2		1	Dogs	Dogs	0.024	1929
916	916	1989	7	49	NA	Rusk	NA	Northern	Male	1	2.5	2					1	Dogs	Dogs	0.024	1929
917	917	1989	7	49	NA	Price	NA	Northern	Male	1	5.5	5		21.1	9.6		0	Trapped	Trapped	0.024	1929
918	918	1989	7	49	NA	Price	NA	Northern	Female	0	4.5	4	3	15.2	6.9		1	Dogs	Dogs	0.024	1929
919	919	1989	7	49	NA	Price	NA	Northern	Male	1	2.5	2					0	Trapped	Trapped	0.024	1929
920	920	1989	7	49	NA	Price	NA	Northern	Female	0	2.5	2	0	12.6	5.7		0	Trapped	Trapped	0.024	1929
921	921	1989	7	49	NA	Price	NA	Northern	Male	1	1.5	1		26.5	12		1	Dogs	Dogs	0.024	1929
922	922	1989	7	49	NA	Price	NA	Northern	Male	1	0.5	0		9.4	4.3		0	Trapped	Trapped	0.024	1929
923	923	1989	7	49	NA	Price	NA	Northern	Male	1	0.5	0		10.8	4.9		1	Dogs	Dogs	0.024	1929
924	924	1989	7	49	NA	Polk	NA	Northern	Female	0	1.5	1	0	13.2	6		1	Dogs	Dogs	0.024	1929
925	925	1989	7	49	NA	Oneida	NA	Northern	Female	0	5.5	5	3	17.9	8.1		1	Dogs	Dogs	0.024	1929
926	926	1989	7	49	NA	Oneida	NA	Northern	Male	1	4.5	4					0	Trapped	Trapped	0.024	1929
927	927	1989	7	49	NA	Oneida	NA	Northern	Female	0	4.5	4	3	13.2	6		1	Dogs	Dogs	0.024	1929
928	928	1989	7	49	NA	Oneida	NA	Northern	Male	1	3.5	3		27.5	12.5		0	Trapped	Trapped	0.024	1929
929	929	1989	7	49	NA	Oneida	NA	Northern	Female	0	0.5	0	0	8.6	3.9		1	Dogs	Dogs	0.024	1929
930	930	1989	7	49	NA	Oneida	NA	Northern	Male	1	NA	NA		21.9	9.9		1	Dogs	Dogs	0.024	1929
931	931	1989	7	49	NA	Oneida	NA	Northern	Female	0	NA	NA	2	9.6	4.4		0	Trapped	Trapped	0.024	1929
932	932	1989	7	49	NA	Oconto	NA	Northern	Female	0	10.5	10	3				0	Trapped	Trapped	0.024	1929
933	933	1989	7	49	NA	Oconto	NA	Northern	Male	1	3.5	3		31.5	14.3		1	Dogs	Dogs	0.024	1929
934	934	1989	7	49	NA	Oconto	NA	Northern	Female	0	3.5	3	0	14.4	6.5		0	Trapped	Trapped	0.024	1929
935	935	1989	7	49	NA	Oconto	NA	Northern	Male	1	2.5	2		25.2	11.4		1	Dogs	Dogs	0.024	1929
936	936	1989	7	49	NA	Oconto	NA	Northern	Female	0	2.5	2	2	17.7	8		1	Dogs	Dogs	0.024	1929
937	937	1989	7	49	NA	Oconto	NA	Northern	Female	0	1.5	1	0	16.8	7.6		1	Dogs	Dogs	0.024	1929
938	938	1989	7	49	NA	Oconto	NA	Northern	Female	0	1.5	1	2	15.5	7		0	Trapped	Trapped	0.024	1929
939	939	1989	7	49	NA	Oconto	NA	Northern	Male	1	NA	NA		31.7	14.4		1	Dogs	Dogs	0.024	1929
940	940	1989	7	49	NA	Marinette	NA	Northern	Female	0	6.5	6	3	15.7	7.1		1	Dogs	Dogs	0.024	1929
941	941	1989	7	49	NA	Marinette	NA	Northern	Female	0	4.5	4	3	19.5	8.8		NA	NA	Other	0.024	1929
942	942	1989	7	49	NA	Marinette	NA	Northern	Female	0	3.5	3	1	19.6	8.9		0	Trapped	Trapped	0.024	1929
943	943	1989	7	49	NA	Marinette	NA	Northern	Female	0	3.5	3	0	10.8	4.9		1	Dogs	Dogs	0.024	1929
944	944	1989	7	49	NA	Marinette	NA	Northern	Male	1	2.5	2					1	Dogs	Dogs	0.024	1929
945	945	1989	7	49	NA	Marinette	NA	Northern	Male	1	1.5	1					0	Trapped	Trapped	0.024	1929
946	946	1989	7	49	NA	Marinette	NA	Northern	Female	0	1.5	1	0	15.9	7.2		1	Dogs	Dogs	0.024	1929
947	947	1989	7	49	NA	Marinette	NA	Northern	Male	1	0.5	0		10.6	4.8		0	Trapped	Trapped	0.024	1929
948	948	1989	7	49	NA	Marinette	NA	Northern	Male	1	0.5	0		11.4	5.2		1	Dogs	Dogs	0.024	1929
949	949	1989	7	49	NA	Marinette	NA	Northern	Female	0	0.5	0	0	10.5	4.8		1	Dogs	Dogs	0.024	1929
950	950	1989	7	49	NA	Marinette	NA	Northern	Female	0	0.5	0	0	14.2	6.4		1	Dogs	Dogs	0.024	1929
951	951	1989	7	49	NA	Marinette	NA	Northern	Female	0	0.5	0	0	16.3	7.4		0	Trapped	Trapped	0.024	1929
952	952	1989	7	49	NA	Lincoln	NA	Northern	Female	0	9.5	9	0	12.5	5.7		1	Dogs	Dogs	0.024	1929
953	953	1989	7	49	NA	Lincoln	NA	Northern	Male	1	1.5	1		21.5	9.8		1	Dogs	Dogs	0.024	1929
954	954	1989	7	49	NA	Lincoln	NA	Northern	Male	1	0.5	0		9.1	4.1		1	Dogs	Dogs	0.024	1929
955	955	1989	7	49	NA	Lincoln	NA	Northern	Male	1	NA	NA		12.8	5.8		0	Trapped	Trapped	0.024	1929
956	956	1989	7	49	NA	Lincoln	NA	Northern	Female	0	NA	NA	3				1	Dogs	Dogs	0.024	1929
957	957	1989	7	49	NA	Langlade	NA	Northern	Male	1	4.5	4		28.4	12.9		1	Dogs	Dogs	0.024	1929
958	958	1989	7	49	NA	Langlade	NA	Northern	Male	1	1.5	1		24.5	11.1		1	Dogs	Dogs	0.024	1929
959	959	1989	7	49	NA	Langlade	NA	Northern	Female	0	1.5	1	0	16.6	7.5		1	Dogs	Dogs	0.024	1929
960	960	1989	7	49	NA	Langlade	NA	Northern	Male	1	0.5	0		9.9	4.5		0	Trapped	Trapped	0.024	1929
961	961	1989	7	49	NA	Langlade	NA	Northern	Male	1	NA	NA					1	Dogs	Dogs	0.024	1929
962	962	1989	7	49	NA	Iron	NA	Northern	Female	0	5.5	5					0	Trapped	Trapped	0.024	1929
963	963	1989	7	49	NA	Marinette	NA	Northern	Male	1	0.5	0		14.5	6.6		1	Dogs	Dogs	0.024	1929
964	964	1989	7	49	NA	Iron	NA	Northern	Male	1	3.5	3		19.9	9		1	Dogs	Dogs	0.024	1929
965	965	1989	7	49	NA	Forest	NA	Northern	Female	0	9.5	9	3				1	Dogs	Dogs	0.024	1929
966	966	1989	7	49	NA	Marinette	NA	Northern	Female	0	2.5	2	2	17.5	7.9		0	Trapped	Trapped	0.024	1929
967	967	1989	7	49	NA	Forest	NA	Northern	Male	1	8.5	8		32.4	14.7		1	Dogs	Dogs	0.024	1929
968	968	1989	7	49	NA	Forest	NA	Northern	Male	1	4.5	4					1	Dogs	Dogs	0.024	1929
969	969	1989	7	49	NA	Forest	NA	Northern	Female	0	2.5	2	0	11.8	5.4		0	Trapped	Trapped	0.024	1929
970	970	1989	7	49	NA	Forest	NA	Northern	Female	0	2.5	2	2	11.4	5.2		0	Trapped	Trapped	0.024	1929
971	971	1989	7	49	NA	Forest	NA	Northern	Male	1	1.5	1		23.2	10.5		1	Dogs	Dogs	0.024	1929
972	972	1989	7	49	NA	Forest	NA	Northern	Male	1	1.5	1		24.2	11		0	Trapped	Trapped	0.024	1929
973	973	1989	7	49	NA	Marinette	NA	Northern	Male	1	3.5	3		24.2	11		0	Trapped	Trapped	0.024	1929
974	974	1989	7	49	NA	Forest	NA	Northern	Female	0	1.5	1	4	15.8	7.2		0	Trapped	Trapped	0.024	1929
975	975	1989	7	49	NA	Forest	NA	Northern	Female	0	1.5	1	2	13.5	6.1		0	Trapped	Trapped	0.024	1929
976	976	1989	7	49	NA	Forest	NA	Northern	Female	0	0.5	0	0				0	Trapped	Trapped	0.024	1929
977	977	1989	7	49	NA	Forest	NA	Northern	Female	0	0.5	0	0				0	Trapped	Trapped	0.024	1929
978	978	1989	7	49	NA	Oconto	NA	Northern	Female	0	3.5	3	3				NA	NA	Other	0.024	1929
979	979	1989	7	49	NA	Florence	NA	Northern	Male	1	NA	NA		15.7	7.1		1	Dogs	Dogs	0.024	1929
980	980	1989	7	49	NA	Douglas	NA	Northern	Female	0	12.5	12	5	14.8	6.7		1	Dogs	Dogs	0.024	1929
981	981	1989	7	49	NA	Douglas	NA	Northern	Male	1	6.5	6		28.3	12.8		0	Trapped	Trapped	0.024	1929
982	982	1989	7	49	NA	Douglas	NA	Northern	Male	1	4.5	4					1	Dogs	Dogs	0.024	1929
983	983	1989	7	49	NA	Oneida	NA	Northern	Female	0	NA	NA	2	13.9	6.3		1	Dogs	Dogs	0.024	1929
984	984	1989	7	49	NA	Douglas	NA	Northern	Male	1	3.5	3		24.5	11.1		1	Dogs	Dogs	0.024	1929
985	985	1989	7	49	NA	Douglas	NA	Northern	Male	1	3.5	3		27.8	12.6		0	Trapped	Trapped	0.024	1929
986	986	1989	7	49	NA	Oneida	NA	Northern	Male	1	1.5	1					0	Trapped	Trapped	0.024	1929
987	987	1989	7	49	NA	Douglas	NA	Northern	Male	1	2.5	2					0	Trapped	Trapped	0.024	1929
988	988	1989	7	49	NA	Douglas	NA	Northern	Male	1	2.5	2		17.9	8.1		0	Trapped	Trapped	0.024	1929
989	989	1989	7	49	NA	Douglas	NA	Northern	Female	0	2.5	2	2	17.4	7.9		0	Trapped	Trapped	0.024	1929
990	990	1989	7	49	NA	Douglas	NA	Northern	Female	0	2.5	2	0	15.9	7.2		1	Dogs	Dogs	0.024	1929
991	991	1989	7	49	NA	Douglas	NA	Northern	Male	1	1.5	1		8.5	3.9		0	Trapped	Trapped	0.024	1929
992	992	1989	7	49	NA	Douglas	NA	Northern	Female	0	1.5	1	2				0	Trapped	Trapped	0.024	1929
993	993	1989	7	49	NA	Price	NA	Northern	Female	0	1.5	1	5	14.5	6.6		NA	NA	NA	0.024	1929
994	994	1989	7	49	NA	Burnett	NA	Northern	Male	1	4.5	4		20.1	9.1		1	Dogs	Dogs	0.024	1929
995	995	1989	7	49	NA	Burnett	NA	Northern	Female	0	4.5	4	2	15.2	6.9		NA	NA	Other	0.024	1929
996	996	1989	7	49	NA	Burnett	NA	Northern	Female	0	3.5	3	3	14.3	6.5		1	Dogs	Dogs	0.024	1929
997	997	1989	7	49	NA	Burnett	NA	Northern	Male	1	1.5	1					1	Dogs	Dogs	0.024	1929
998	998	1989	7	49	NA	Price	NA	Northern	Male	1	3.5	3		24.5	11.1		0	Trapped	Trapped	0.024	1929
999	999	1989	7	49	NA	Burnett	NA	Northern	Male	1	1.5	1					0	Trapped	Trapped	0.024	1929
1000	1000	1989	7	49	NA	Burnett	NA	Northern	Female	0	1.5	1	0	18.3	8.3		1	Dogs	Dogs	0.024	1929
1001	1001	1989	7	49	NA	Burnett	NA	Northern	Female	0	1.5	1	2	16.1	7.3		1	Dogs	Dogs	0.024	1929
1002	1002	1989	7	49	NA	Burnett	NA	Northern	Female	0	0.5	0	0	8.8	4		0	Trapped	Trapped	0.024	1929
1003	1003	1989	7	49	NA	Rusk	NA	Northern	Female	0	4.5	4					0	Trapped	Trapped	0.024	1929
1004	1004	1989	7	49	NA	Burnett	NA	Northern	Male	1	NA	NA					1	Dogs	Dogs	0.024	1929
1005	1005	1989	7	49	NA	Bayfield	NA	Northern	Male	1	2.5	2					0	Trapped	Trapped	0.024	1929
1006	1006	1989	7	49	NA	Bayfield	NA	Northern	Female	0	0.5	0	0	10.7	4.9		0	Trapped	Trapped	0.024	1929
1007	1007	1989	7	49	NA	Ashland	NA	Northern	Male	1	1.5	1					1	Dogs	Dogs	0.024	1929
1008	1008	1989	7	49	NA	Unknown	NA	Northern	Male	1	5.5	5		37.5	17		NA	NA	NA	0.024	1929
1009	1009	1989	7	49	NA	Unknown	NA	Northern	Male	1	2.5	2		20.4	9.3		1	Dogs	Dogs	0.024	1929
1010	1010	1989	7	49	NA	Unknown	NA	Northern	Female	0	1.5	1	5	14.5	6.6		NA	NA	NA	0.024	1929
1011	1011	1989	7	49	NA	Unknown	NA	Northern	Female	0	1.5	1	0	13.5	6.1		NA	NA	NA	0.024	1929
1012	1012	1989	7	49	NA	Unknown	NA	Northern	Female	0	1.5	1	4				NA	NA	NA	0.024	1929
1013	1013	1989	7	49	NA	Unknown	NA	Northern	Male	1	0.5	0		9.3	4.2		NA	NA	NA	0.024	1929
1014	1014	1989	7	49	NA	Unknown	NA	Northern	Male	1	0.5	0		10.5	4.8		NA	NA	NA	0.024	1929
1015	1015	1989	7	49	NA	Unknown	NA	Northern	Male	1	0.5	0		20.7	9.4		NA	NA	NA	0.024	1929
1016	1016	1989	7	49	NA	Unknown	NA	Northern	Female	0	0.5	0	0				NA	NA	NA	0.024	1929
1017	1017	1989	7	49	NA	Unknown	NA	Northern	Female	0	0.5	0	0	9.5	4.3		NA	NA	NA	0.024	1929
1018	1018	1989	7	49	NA	Unknown	NA	Northern	Female	0	0.5	0	0	10.5	4.8		NA	NA	NA	0.024	1929
1019	1019	1989	7	49	NA	Unknown	NA	Northern	Female	0	0.5	0	0	11.4	5.2		NA	NA	NA	0.024	1929
1020	1020	1989	7	49	NA	Unknown	NA	Northern	Male	1	NA	NA					NA	NA	NA	0.024	1929
1021	1021	1990	8	64	NA	Washburn	NA	Northern	Female	0	4.5	4	2				1	Dogs	Dogs	0.0679	1928
1022	1022	1990	8	64	NA	Washburn	NA	Northern	Male	1	2.5	2		19.7	8.9		0	Trapped	Trapped	0.0679	1928
1023	1023	1990	8	64	NA	Washburn	NA	Northern	Female	0	2.5	2	4	19.4	8.8		0	Trapped	Trapped	0.0679	1928
1024	1024	1990	8	64	NA	Washburn	NA	Northern	Male	1	1.5	1					1	Dogs	Dogs	0.0679	1928
1025	1025	1990	8	64	NA	Washburn	NA	Northern	Female	0	0.5	0	0				1	Dogs	Dogs	0.0679	1928
1026	1026	1990	8	64	NA	Washburn	NA	Northern	Female	0	0.5	0	0	12.2	5.5		1	Dogs	Dogs	0.0679	1928
1027	1027	1990	8	64	NA	Vilas	NA	Northern	Female	0	6.5	6	3	18.6	8.4		1	Dogs	Dogs	0.0679	1928
1028	1028	1990	8	64	NA	Taylor	NA	Northern	Male	1	2.5	2		24.1	10.9		1	Dogs	Dogs	0.0679	1928
1029	1029	1990	8	64	NA	Taylor	NA	Northern	Female	0	1.5	1	6	18.1	8.2		1	Dogs	Dogs	0.0679	1928
1030	1030	1990	8	64	NA	Taylor	NA	Northern	Female	0	0.5	0	0	7.3	3.3		NA	NA	Other	0.0679	1928
1031	1031	1990	8	64	NA	Rusk	NA	Northern	Male	1	1.5	1		18.7	8.5		1	Dogs	Dogs	0.0679	1928
1032	1032	1990	8	64	NA	Rusk	NA	Northern	Male	1	0.5	0		7.1	3.2		NA	NA	Other	0.0679	1928
1033	1033	1990	8	64	NA	Price	NA	Northern	Female	0	2.5	2	0	16.7	7.6		0	Trapped	Trapped	0.0679	1928
1034	1034	1990	8	64	NA	Price	NA	Northern	Female	0	1.5	1	0	15.5	7		0	Trapped	Trapped	0.0679	1928
1035	1035	1990	8	64	NA	Price	NA	Northern	Male	1	0.5	0		11.9	5.4		0	Trapped	Trapped	0.0679	1928
1036	1036	1990	8	64	NA	Price	NA	Northern	Male	1	0.5	0		12.5	5.7		1	Dogs	Dogs	0.0679	1928
1037	1037	1990	8	64	NA	Price	NA	Northern	Female	0	0.5	0	0	8.3	3.8		NA	NA	Other	0.0679	1928
1038	1038	1990	8	64	NA	Price	NA	Northern	Male	1	NA	NA					1	Dogs	Dogs	0.0679	1928
1039	1039	1990	8	64	NA	Oneida	NA	Northern	Male	1	5.5	5		31.2	14.2		1	Dogs	Dogs	0.0679	1928
1040	1040	1990	8	64	NA	Oneida	NA	Northern	Male	1	3.5	3		26.1	11.8		1	Dogs	Dogs	0.0679	1928
1041	1041	1990	8	64	NA	Oneida	NA	Northern	Male	1	0.5	0		12.4	5.6		1	Dogs	Dogs	0.0679	1928
1042	1042	1990	8	64	NA	Oneida	NA	Northern	Female	0	0.5	0	0	5.6	2.5		0	Trapped	Trapped	0.0679	1928
1043	1043	1990	8	64	NA	Oneida	NA	Northern	Female	0	0.5	0	0	6.5	2.9		1	Dogs	Dogs	0.0679	1928
1044	1044	1990	8	64	NA	Oneida	NA	Northern	Female	0	0.5	0	0	7.5	3.4		1	Dogs	Dogs	0.0679	1928
1045	1045	1990	8	64	NA	Oneida	NA	Northern	Female	0	0.5	0	0	11.6	5.3		1	Dogs	Dogs	0.0679	1928
1046	1046	1990	8	64	NA	Oneida	NA	Northern	Female	0	NA	NA					1	Dogs	Dogs	0.0679	1928
1047	1047	1990	8	64	NA	Marinette	NA	Northern	Male	1	6.5	6		28.4	12.9		NA	NA	Other	0.0679	1928
1048	1048	1990	8	64	NA	Marinette	NA	Northern	Female	0	1.5	1	0	16.6	7.5		1	Dogs	Dogs	0.0679	1928
1049	1049	1990	8	64	NA	Marinette	NA	Northern	Male	1	0.5	0		11.7	5.3		1	Dogs	Dogs	0.0679	1928
1050	1050	1990	8	64	NA	Marinette	NA	Northern	Female	0	0.5	0	0	7.5	3.4		1	Dogs	Dogs	0.0679	1928
1051	1051	1990	8	64	NA	Lincoln	NA	Northern	Female	0	11.5	11	2	17.1	7.8		1	Dogs	Dogs	0.0679	1928
1052	1052	1990	8	64	NA	Lincoln	NA	Northern	Male	1	3.5	3					1	Dogs	Dogs	0.0679	1928
1053	1053	1990	8	64	NA	Lincoln	NA	Northern	Male	1	2.5	2		22.2	10.1		1	Dogs	Dogs	0.0679	1928
1054	1054	1990	8	64	NA	Lincoln	NA	Northern	Female	0	1.5	1	0	10.7	4.9		1	Dogs	Dogs	0.0679	1928
1055	1055	1990	8	64	NA	Lincoln	NA	Northern	Male	1	0.5	0					0	Trapped	Trapped	0.0679	1928
1056	1056	1990	8	64	NA	Lincoln	NA	Northern	Male	1	0.5	0		5.8	2.6		1	Dogs	Dogs	0.0679	1928
1057	1057	1990	8	64	NA	Lincoln	NA	Northern	Female	0	0.5	0	0				1	Dogs	Dogs	0.0679	1928
1058	1058	1990	8	64	NA	Lincoln	NA	Northern	Female	0	0.5	0	0	10.8	4.9		0	Trapped	Trapped	0.0679	1928
1059	1059	1990	8	64	NA	Lincoln	NA	Northern	Male	1	NA	NA		20.2	9.2		1	Dogs	Dogs	0.0679	1928
1060	1060	1990	8	64	NA	Lincoln	NA	Northern	Male	1	0.5	0		8.8	4		1	Dogs	Dogs	0.0679	1928
1061	1061	1990	8	64	NA	Langlade	NA	Northern	Female	0	2.5	2	3	19.8	9		0	Trapped	Trapped	0.0679	1928
1062	1062	1990	8	64	NA	Langlade	NA	Northern	Female	0	1.5	1	0				1	Dogs	Dogs	0.0679	1928
1063	1063	1990	8	64	NA	Langlade	NA	Northern	Male	1	NA	NA		12.8	5.8		1	Dogs	Dogs	0.0679	1928
1064	1064	1990	8	64	NA	Iron	NA	Northern	Female	0	0.5	0	0				0	Trapped	Trapped	0.0679	1928
1065	1065	1990	8	64	NA	Forest	NA	Northern	Female	0	14.5	14	0	20.5	9.3		NA	NA	Other	0.0679	1928
1066	1066	1990	8	64	NA	Forest	NA	Northern	Male	1	4.5	4					1	Dogs	Dogs	0.0679	1928
1067	1067	1990	8	64	NA	Forest	NA	Northern	Male	1	4.5	4		33.5	15.2		NA	NA	Other	0.0679	1928
1068	1068	1990	8	64	NA	Forest	NA	Northern	Male	1	3.5	3		31.3	14.2		1	Dogs	Dogs	0.0679	1928
1069	1069	1990	8	64	NA	Lincoln	NA	Northern	Male	1	1.5	1					1	Dogs	Dogs	0.0679	1928
1070	1070	1990	8	64	NA	Forest	NA	Northern	Male	1	2.5	2					1	Dogs	Dogs	0.0679	1928
1071	1071	1990	8	64	NA	Forest	NA	Northern	Male	1	2.5	2		19.4	8.8		1	Dogs	Dogs	0.0679	1928
1072	1072	1990	8	64	NA	Forest	NA	Northern	Female	0	2.5	2	4	20.3	9.2		1	Dogs	Dogs	0.0679	1928
1073	1073	1990	8	64	NA	Forest	NA	Northern	Male	1	1.5	1		20.4	9.3		0	Trapped	Trapped	0.0679	1928
1074	1074	1990	8	64	NA	Oconto	NA	Northern	Male	1	0.5	0		10.8	4.9		NA	NA	NA	0.0679	1928
1075	1075	1990	8	64	NA	Forest	NA	Northern	Male	1	1.5	1		20.5	9.3		0	Trapped	Trapped	0.0679	1928
1076	1076	1990	8	64	NA	Forest	NA	Northern	Female	0	1.5	1	0	13.1	5.9		0	Trapped	Trapped	0.0679	1928
1077	1077	1990	8	64	NA	Forest	NA	Northern	Female	0	1.5	1	0	18.7	8.5		1	Dogs	Dogs	0.0679	1928
1078	1078	1990	8	64	NA	Forest	NA	Northern	Female	0	0.5	0	0				0	Trapped	Trapped	0.0679	1928
1079	1079	1990	8	64	NA	Oneida	NA	Northern	Female	0	0.5	0	0	11.9	5.4		1	Dogs	Dogs	0.0679	1928
1080	1080	1990	8	64	NA	Oneida	NA	Northern	Female	0	1.5	1	3	16.5	7.5		1	Dogs	Dogs	0.0679	1928
1081	1081	1990	8	64	NA	Forest	NA	Northern	Female	0	0.5	0	0	5.7	2.6		0	Trapped	Trapped	0.0679	1928
1082	1082	1990	8	64	NA	Forest	NA	Northern	Female	0	0.5	0	0	7.4	3.4		0	Trapped	Trapped	0.0679	1928
1083	1083	1990	8	64	NA	Forest	NA	Northern	Female	0	0.5	0	0	10.4	4.7		1	Dogs	Dogs	0.0679	1928
1084	1084	1990	8	64	NA	Forest	NA	Northern	Female	0	0.5	0	0	11.2	5.1		1	Dogs	Dogs	0.0679	1928
1085	1085	1990	8	64	NA	Florence	NA	Northern	Male	1	3.5	3					0	Trapped	Trapped	0.0679	1928
1086	1086	1990	8	64	NA	Florence	NA	Northern	Female	0	2.5	2	2	15.5	7		0	Trapped	Trapped	0.0679	1928
1087	1087	1990	8	64	NA	Florence	NA	Northern	Female	0	0.5	0	0				0	Trapped	Trapped	0.0679	1928
1088	1088	1990	8	64	NA	Florence	NA	Northern	Male	1	NA	NA					0	Trapped	Trapped	0.0679	1928
1089	1089	1990	8	64	NA	Price	NA	Northern	Female	0	1.5	1	0	16.3	7.4		0	Trapped	Trapped	0.0679	1928
1090	1090	1990	8	64	NA	Douglas	NA	Northern	Male	1	3.5	3					1	Dogs	Dogs	0.0679	1928
1091	1091	1990	8	64	NA	Douglas	NA	Northern	Male	1	2.5	2					1	Dogs	Dogs	0.0679	1928
1092	1092	1990	8	64	NA	Douglas	NA	Northern	Male	1	2.5	2		20.6	9.3		1	Dogs	Dogs	0.0679	1928
1093	1093	1990	8	64	NA	Douglas	NA	Northern	Female	0	1.5	1	0	15.3	6.9		0	Trapped	Trapped	0.0679	1928
1094	1094	1990	8	64	NA	Taylor	NA	Northern	Male	1	NA	NA					1	Dogs	Dogs	0.0679	1928
1095	1095	1990	8	64	NA	Douglas	NA	Northern	Female	0	1.5	1	0	15.3	6.9		0	Trapped	Trapped	0.0679	1928
1096	1096	1990	8	64	NA	Douglas	NA	Northern	Male	1	0.5	0		12.2	5.5		1	Dogs	Dogs	0.0679	1928
1097	1097	1990	8	64	NA	Douglas	NA	Northern	Female	0	0.5	0	0	10.5	4.8		0	Trapped	Trapped	0.0679	1928
1098	1098	1990	8	64	NA	Douglas	NA	Northern	Female	0	0.5	0	0	15.4	7		0	Trapped	Trapped	0.0679	1928
1099	1099	1990	8	64	NA	Taylor	NA	Northern	Male	1	2.5	2		24.8	11.2		1	Dogs	Dogs	0.0679	1928
1100	1100	1990	8	64	NA	Chippewa	NA	Northern	Male	1	3.5	3		23.1	10.5		1	Dogs	Dogs	0.0679	1928
1101	1101	1990	8	64	NA	Unknown	NA	Northern	Female	0	5.5	5	0	17.3	7.8		NA	NA	NA	0.0679	1928
1102	1102	1990	8	64	NA	Unknown	NA	Northern	Male	1	1.5	1		6.8	3.1		NA	NA	NA	0.0679	1928
1103	1103	1990	8	64	NA	Unknown	NA	Northern	Male	1	1.5	1		25.4	11.5		NA	NA	NA	0.0679	1928
1104	1104	1990	8	64	NA	Unknown	NA	Northern	Female	0	1.5	1	2	15.2	6.9		NA	NA	NA	0.0679	1928
1105	1105	1990	8	64	NA	Unknown	NA	Northern	Female	0	1.5	1		6.8	3.1		NA	NA	NA	0.0679	1928
1106	1106	1990	8	64	NA	Unknown	NA	Northern	Male	1	0.5	0					NA	NA	NA	0.0679	1928
1107	1107	1990	8	64	NA	Unknown	NA	Northern	Male	1	0.5	0					0	Trapped	Trapped	0.0679	1928
1108	1108	1990	8	64	NA	Unknown	NA	Northern	Male	1	0.5	0		7.2	3.3		NA	NA	NA	0.0679	1928
1109	1109	1990	8	64	NA	Unknown	NA	Northern	Male	1	0.5	0		10.3	4.7		NA	NA	NA	0.0679	1928
1110	1110	1990	8	64	NA	Unknown	NA	Northern	Male	1	0.5	0		14.7	6.7		NA	NA	NA	0.0679	1928
1111	1111	1990	8	64	NA	Unknown	NA	Northern	Female	0	0.5	0	0	12.5	5.7		NA	NA	NA	0.0679	1928
1112	1112	1990	8	64	NA	Unknown	NA	Northern	Female	0	0.5	0	0	14.3	6.5		NA	NA	NA	0.0679	1928
1113	1113	1990	8	64	NA	Unknown	NA	Northern	Male	1	NA	NA					NA	NA	Other	0.0679	1928
1114	1114	1990	8	64	NA	Unknown	NA	Northern	NA	NA	NA	NA					NA	NA	Other	0.0679	1928
1115	1115	1991	9	81	NA	Washburn	NA	Northern	Male	1	3.5	3		25.2	11.4		1	Dogs	Dogs	0.0815	1967
1116	1116	1991	9	81	NA	Washburn	NA	Northern	Male	1	1.5	1		24.3	11		NA	NA	Other	0.0815	1967
1117	1117	1991	9	81	NA	Taylor	NA	Northern	Male	1	4.5	4		28.6	13		1	Dogs	Dogs	0.0815	1967
1118	1118	1991	9	81	NA	Taylor	NA	Northern	Male	1	1.5	1		18.5	8.4		1	Dogs	Dogs	0.0815	1967
1119	1119	1991	9	81	NA	Taylor	NA	Northern	Female	0	1.5	1	5	19.1	8.7		NA	NA	NA	0.0815	1967
1120	1120	1991	9	81	NA	Taylor	NA	Northern	Male	1	0.5	0		5.2	2.4		1	Dogs	Dogs	0.0815	1967
1121	1121	1991	9	81	NA	Taylor	NA	Northern	Female	0	0.5	0	0	3.1	1.4		1	Dogs	Dogs	0.0815	1967
1122	1122	1991	9	81	NA	Sawyer	NA	Northern	Male	1	4.5	4					1	Dogs	Dogs	0.0815	1967
1123	1123	1991	9	81	NA	Sawyer	NA	Northern	Female	0	2.5	2	3	19.1	8.7		1	Dogs	Dogs	0.0815	1967
1124	1124	1991	9	81	NA	Sawyer	NA	Northern	Male	1	1.5	1		22.6	10.3		NA	NA	NA	0.0815	1967
1125	1125	1991	9	81	NA	Sawyer	NA	Northern	Female	0	0.5	0	0				0	Trapped	Trapped	0.0815	1967
1126	1126	1991	9	81	NA	Rusk	NA	Northern	Male	1	0.5	0		7.8	3.5		NA	NA	NA	0.0815	1967
1127	1127	1991	9	81	NA	Rusk	NA	Northern	Male	1	0.5	0		12.4	5.6		1	Dogs	Dogs	0.0815	1967
1128	1128	1991	9	81	NA	Rusk	NA	Northern	Female	0	0.5	0	0	9.4	4.3		1	Dogs	Dogs	0.0815	1967
1129	1129	1991	9	81	NA	Price	NA	Northern	Female	0	12.5	12	2	18.5	8.4		0	Trapped	Trapped	0.0815	1967
1130	1130	1991	9	81	NA	Price	NA	Northern	Female	0	4.5	4	3	18.3	8.3		0	Trapped	Trapped	0.0815	1967
1131	1131	1991	9	81	NA	Price	NA	Northern	Female	0	2.5	2	0	17.4	7.9		0	Trapped	Trapped	0.0815	1967
1132	1132	1991	9	81	NA	Price	NA	Northern	Male	1	1.5	1					NA	NA	NA	0.0815	1967
1133	1133	1991	9	81	NA	Price	NA	Northern	Male	1	1.5	1		23.6	10.7		0	Trapped	Trapped	0.0815	1967
1134	1134	1991	9	81	NA	Price	NA	Northern	Male	1	0.5	0		6.9	3.1		0	Trapped	Trapped	0.0815	1967
1135	1135	1991	9	81	NA	Oneida	NA	Northern	Male	1	2.5	2		21.5	9.8		0	Trapped	Trapped	0.0815	1967
1136	1136	1991	9	81	NA	Oneida	NA	Northern	Male	1	2.5	2		22.7	10.3		1	Dogs	Dogs	0.0815	1967
1137	1137	1991	9	81	NA	Oneida	NA	Northern	Female	0	2.5	2	3				1	Dogs	Dogs	0.0815	1967
1138	1138	1991	9	81	NA	Oneida	NA	Northern	Female	0	0.5	0	0	9.3	4.2		1	Dogs	Dogs	0.0815	1967
1139	1139	1991	9	81	NA	Oneida	NA	Northern	Female	0	0.5	0	0	9.8	4.4		1	Dogs	Dogs	0.0815	1967
1140	1140	1991	9	81	NA	Lincoln	NA	Northern	Female	0	3.5	3	3	26.4	12		1	Dogs	Dogs	0.0815	1967
1141	1141	1991	9	81	NA	Lincoln	NA	Northern	Male	1	2.5	2		22.9	10.4		1	Dogs	Dogs	0.0815	1967
1142	1142	1991	9	81	NA	Lincoln	NA	Northern	Male	1	2.5	2		29.5	13.4		1	Dogs	Dogs	0.0815	1967
1143	1143	1991	9	81	NA	Oneida	NA	Northern	Male	1	2.5	2		29.6	13.4		1	Dogs	Dogs	0.0815	1967
1144	1144	1991	9	81	NA	Lincoln	NA	Northern	Female	0	NA	NA	2	17.8	8.1		0	Trapped	Trapped	0.0815	1967
1145	1145	1991	9	81	NA	Langlade	NA	Northern	Female	0	0.5	0	0				1	Dogs	Dogs	0.0815	1967
1146	1146	1991	9	81	NA	Forest	NA	Northern	Female	0	2.5	2	0	14.2	6.4		0	Trapped	Trapped	0.0815	1967
1147	1147	1991	9	81	NA	Forest	NA	Northern	Male	1	1.5	1					1	Dogs	Dogs	0.0815	1967
1148	1148	1991	9	81	NA	Forest	NA	Northern	Male	1	1.5	1		19.8	9		NA	NA	Other	0.0815	1967
1149	1149	1991	9	81	NA	Forest	NA	Northern	Male	1	1.5	1		21.5	9.8		1	Dogs	Dogs	0.0815	1967
1150	1150	1991	9	81	NA	Forest	NA	Northern	Female	0	1.5	1	0	18.4	8.3		0	Trapped	Trapped	0.0815	1967
1151	1151	1991	9	81	NA	Forest	NA	Northern	Male	1	NA	NA		15.2	6.9		1	Dogs	Dogs	0.0815	1967
1152	1152	1991	9	81	NA	Rusk	NA	Northern	Female	0	0.5	0	0	13.4	6.1		1	Dogs	Dogs	0.0815	1967
1153	1153	1991	9	81	NA	Forest	NA	Northern	Female	0	NA	NA					1	Dogs	Dogs	0.0815	1967
1154	1154	1991	9	81	NA	Florence	NA	Northern	Male	1	2.5	2					0	Trapped	Trapped	0.0815	1967
1155	1155	1991	9	81	NA	Rusk	NA	Northern	Male	1	2.5	2		29.8	13.5		1	Dogs	Dogs	0.0815	1967
1156	1156	1991	9	81	NA	Florence	NA	Northern	Female	0	2.5	2	0	12.9	5.9		0	Trapped	Trapped	0.0815	1967
1157	1157	1991	9	81	NA	Florence	NA	Northern	Male	1	1.5	1		18.4	8.3		0	Trapped	Trapped	0.0815	1967
1158	1158	1991	9	81	NA	Sawyer	NA	Northern	Male	1	4.5	4		14.5	6.6		1	Dogs	Dogs	0.0815	1967
1159	1159	1991	9	81	NA	Florence	NA	Northern	Female	0	1.5	1	0	14.5	6.6		0	Trapped	Trapped	0.0815	1967
1160	1160	1991	9	81	NA	Florence	NA	Northern	Female	0	1.5	1	0	18.2	8.3		0	Trapped	Trapped	0.0815	1967
1161	1161	1991	9	81	NA	Florence	NA	Northern	Female	0	NA	NA	2	16.1	7.3		0	Trapped	Trapped	0.0815	1967
1162	1162	1991	9	81	NA	Douglas	NA	Northern	Male	1	3.5	3		22.7	10.3		1	Dogs	Dogs	0.0815	1967
1163	1163	1991	9	81	NA	Douglas	NA	Northern	Female	0	3.5	3	3	18.5	8.4		0	Trapped	Trapped	0.0815	1967
1164	1164	1991	9	81	NA	Douglas	NA	Northern	Male	1	0.5	0					1	Dogs	Dogs	0.0815	1967
1165	1165	1991	9	81	NA	Douglas	NA	Northern	Male	1	0.5	0		8.2	3.7		NA	NA	NA	0.0815	1967
1166	1166	1991	9	81	NA	Chippewa	NA	Northern	Male	1	3.5	3					NA	NA	NA	0.0815	1967
1167	1167	1991	9	81	NA	Chippewa	NA	Northern	Female	0	2.5	2	0	32.8	14.9		1	Dogs	Dogs	0.0815	1967
1168	1168	1991	9	81	NA	Burnett	NA	Northern	Female	0	3.5	3	3	15.8	7.2		1	Dogs	Dogs	0.0815	1967
1169	1169	1991	9	81	NA	Burnett	NA	Northern	Female	0	1.5	1		15.3	6.9		1	Dogs	Dogs	0.0815	1967
1170	1170	1991	9	81	NA	Burnett	NA	Northern	Male	1	0.5	0		12.7	5.8		1	Dogs	Dogs	0.0815	1967
1171	1171	1991	9	81	NA	Washburn	NA	Northern	Male	1	2.5	2					0	Trapped	Trapped	0.0815	1967
1172	1172	1991	9	81	NA	Burnett	NA	Northern	Male	1	NA	NA		23.5	10.7		1	Dogs	Dogs	0.0815	1967
1173	1173	1991	9	81	NA	Unknown	NA	Northern	Female	0	3.5	3	2				NA	NA	NA	0.0815	1967
1174	1174	1991	9	81	NA	Unknown	NA	Northern	Male	1	1.5	1		29.8	13.5		NA	NA	NA	0.0815	1967
1175	1175	1991	9	81	NA	Unknown	NA	Northern	Female	0	1.5	1	0	16.6	7.5		NA	NA	NA	0.0815	1967
1176	1176	1991	9	81	NA	Unknown	NA	Northern	Female	0	0.5	0	0	11.4	5.2		NA	NA	NA	0.0815	1967
1177	1177	1991	9	81	NA	Unknown	NA	Northern	Male	1	NA	NA		21.5	9.8		NA	NA	NA	0.0815	1967
1178	1178	1991	9	81	NA	Unknown	NA	Northern	Male	1	NA	NA		25.2	11.4		NA	NA	NA	0.0815	1967
1179	1179	1992	10	100	NA	Marinette	NA	Northern	Female	0	2.5	2	0	17.8	8.1		1	Dogs	Dogs	0.0833	2148
1180	1180	1992	10	100	NA	Marinette	NA	Northern	Male	1	0.5	0		12.2	5.5		0	Trapped	Trapped	0.0833	2148
1181	1181	1992	10	100	NA	Lincoln	NA	Northern	Male	1	3.5	3		22.7	10.3		1	Dogs	Dogs	0.0833	2148
1182	1182	1992	10	100	NA	Lincoln	NA	Northern	Male	1	2.5	2					0	Trapped	Trapped	0.0833	2148
1183	1183	1992	10	100	NA	Lincoln	NA	Northern	Male	1	2.5	2					0	Trapped	Trapped	0.0833	2148
1184	1184	1992	10	100	NA	Lincoln	NA	Northern	Female	0	2.5	2	0				1	Dogs	Dogs	0.0833	2148
1185	1185	1992	10	100	NA	Lincoln	NA	Northern	Male	1	1.5	1		22.9	10.4		1	Dogs	Dogs	0.0833	2148
1186	1186	1992	10	100	NA	Lincoln	NA	Northern	Male	1	1.5	1		25.8	11.7		1	Dogs	Dogs	0.0833	2148
1187	1187	1992	10	100	NA	Lincoln	NA	Northern	Female	0	1.5	1	0	14.6	6.6		1	Dogs	Dogs	0.0833	2148
1188	1188	1992	10	100	NA	Lincoln	NA	Northern	Female	0	1.5	1	3	16.5	7.5		1	Dogs	Dogs	0.0833	2148
1189	1189	1992	10	100	NA	Lincoln	NA	Northern	Female	0	1.5	1	0	18.5	8.4		1	Dogs	Dogs	0.0833	2148
1190	1190	1992	10	100	NA	Lincoln	NA	Northern	Male	1	0.5	0		5.8	2.6		1	Dogs	Dogs	0.0833	2148
1191	1191	1992	10	100	NA	Lincoln	NA	Northern	Female	0	0.5	0	0	7.3	3.3		1	Dogs	Dogs	0.0833	2148
1192	1192	1992	10	100	NA	Lincoln	NA	Northern	Male	1	NA	NA		21.2	9.6		1	Dogs	Dogs	0.0833	2148
1193	1193	1992	10	100	NA	Lincoln	NA	Northern	Male	1	NA	NA		22.2	10.1		1	Dogs	Dogs	0.0833	2148
1194	1194	1992	10	100	NA	Lincoln	NA	Northern	Female	0	NA	NA		14.4	6.5		1	Dogs	Dogs	0.0833	2148
1195	1195	1992	10	100	NA	Langlade	NA	Northern	Male	1	1.5	1		20.5	9.3		1	Dogs	Dogs	0.0833	2148
1196	1196	1992	10	100	NA	Langlade	NA	Northern	Female	0	1.5	1	0				NA	NA	NA	0.0833	2148
1197	1197	1992	10	100	NA	Langlade	NA	Northern	Male	1	0.5	0		10.3	4.7		0	Trapped	Trapped	0.0833	2148
1198	1198	1992	10	100	NA	Forest	NA	Northern	Male	1	8.5	8		31.2	14.2		1	Dogs	Dogs	0.0833	2148
1199	1199	1992	10	100	NA	Forest	NA	Northern	Male	1	5.5	5		32	14.5		1	Dogs	Dogs	0.0833	2148
1200	1200	1992	10	100	NA	Forest	NA	Northern	Male	1	4.5	4					1	Dogs	Dogs	0.0833	2148
1201	1201	1992	10	100	NA	Lincoln	NA	Northern	Male	1	0.5	0		19.8	9		0	Trapped	Trapped	0.0833	2148
1202	1202	1992	10	100	NA	Forest	NA	Northern	Female	0	4.5	4	1	17.8	8.1		1	Dogs	Dogs	0.0833	2148
1203	1203	1992	10	100	NA	Forest	NA	Northern	Male	1	3.5	3		25.1	11.4		1	Dogs	Dogs	0.0833	2148
1204	1204	1992	10	100	NA	Forest	NA	Northern	Male	1	3.5	3		27.3	12.4		1	Dogs	Dogs	0.0833	2148
1205	1205	1992	10	100	NA	Forest	NA	Northern	Male	1	2.5	2		26.3	11.9		1	Dogs	Dogs	0.0833	2148
1206	1206	1992	10	100	NA	Lincoln	NA	Northern	Male	1	1.5	1		31.3	14.2		1	Dogs	Dogs	0.0833	2148
1207	1207	1992	10	100	NA	Lincoln	NA	Northern	Male	1	2.5	2		26.2	11.9		1	Dogs	Dogs	0.0833	2148
1208	1208	1992	10	100	NA	Forest	NA	Northern	Male	1	2.5	2		28.2	12.8		1	Dogs	Dogs	0.0833	2148
1209	1209	1992	10	100	NA	Forest	NA	Northern	Male	1	2.5	2		30.3	13.7		1	Dogs	Dogs	0.0833	2148
1210	1210	1992	10	100	NA	Forest	NA	Northern	Female	0	2.5	2	3	20.1	9.1		1	Dogs	Dogs	0.0833	2148
1211	1211	1992	10	100	NA	Forest	NA	Northern	Male	1	1.5	1					1	Dogs	Dogs	0.0833	2148
1212	1212	1992	10	100	NA	Forest	NA	Northern	Male	1	1.5	1					1	Dogs	Dogs	0.0833	2148
1213	1213	1992	10	100	NA	Forest	NA	Northern	Male	1	1.5	1		20.2	9.2		1	Dogs	Dogs	0.0833	2148
1214	1214	1992	10	100	NA	Forest	NA	Northern	Male	1	1.5	1		24.5	11.1		1	Dogs	Dogs	0.0833	2148
1215	1215	1992	10	100	NA	Forest	NA	Northern	Female	0	1.5	1	3	21.6	9.8		1	Dogs	Dogs	0.0833	2148
1216	1216	1992	10	100	NA	Marinette	NA	Northern	Male	1	3.5	3		21.5	9.8		NA	NA	Other	0.0833	2148
1217	1217	1992	10	100	NA	Forest	NA	Northern	Female	0	1.5	1	2	17.8	8.1		1	Dogs	Dogs	0.0833	2148
1218	1218	1992	10	100	NA	Forest	NA	Northern	Female	0	1.5	1		16.5	7.5		0	Trapped	Trapped	0.0833	2148
1219	1219	1992	10	100	NA	Forest	NA	Northern	Female	0	1.5	1	4	16.4	7.4		1	Dogs	Dogs	0.0833	2148
1220	1220	1992	10	100	NA	Forest	NA	Northern	Female	0	1.5	1	0	16.4	7.4		1	Dogs	Dogs	0.0833	2148
1221	1221	1992	10	100	NA	Oconto	NA	Northern	Male	1	1.5	1		19.2	8.7		1	Dogs	Dogs	0.0833	2148
1222	1222	1992	10	100	NA	Forest	NA	Northern	Male	1	0.5	0		7.3	3.3		1	Dogs	Dogs	0.0833	2148
1223	1223	1992	10	100	NA	Forest	NA	Northern	Female	0	0.5	0	0	8	3.6		0	Trapped	Trapped	0.0833	2148
1224	1224	1992	10	100	NA	Forest	NA	Northern	Female	0	0.5	0	0	11.7	5.3		1	Dogs	Dogs	0.0833	2148
1225	1225	1992	10	100	NA	Forest	NA	Northern	Male	1	NA	NA					0	Trapped	Trapped	0.0833	2148
1226	1226	1992	10	100	NA	Oneida	NA	Northern	Female	0	0.5	0	0	10.3	4.7		0	Trapped	Trapped	0.0833	2148
1227	1227	1992	10	100	NA	Forest	NA	Northern	Male	1	NA	NA		30.5	13.8		1	Dogs	Dogs	0.0833	2148
1228	1228	1992	10	100	NA	Florence	NA	Northern	Male	1	3.5	3		23.3	10.6		0	Trapped	Trapped	0.0833	2148
1229	1229	1992	10	100	NA	Florence	NA	Northern	Male	1	3.5	3		25.9	11.7		1	Dogs	Dogs	0.0833	2148
1230	1230	1992	10	100	NA	Florence	NA	Northern	Male	1	2.5	2					0	Trapped	Trapped	0.0833	2148
1231	1231	1992	10	100	NA	Florence	NA	Northern	Female	0	1.5	1	0				0	Trapped	Trapped	0.0833	2148
1232	1232	1992	10	100	NA	Florence	NA	Northern	Female	0	1.5	1	0	16.1	7.3		0	Trapped	Trapped	0.0833	2148
1233	1233	1992	10	100	NA	Florence	NA	Northern	Male	1	0.5	0					1	Dogs	Dogs	0.0833	2148
1234	1234	1992	10	100	NA	Florence	NA	Northern	Male	1	0.5	0		12.1	5.5		1	Dogs	Dogs	0.0833	2148
1235	1235	1992	10	100	NA	Oneida	NA	Northern	Male	1	3.5	3					1	Dogs	Dogs	0.0833	2148
1236	1236	1992	10	100	NA	Price	NA	Northern	Female	0	NA	NA	0	17.5	7.9		0	Trapped	Trapped	0.0833	2148
1237	1237	1992	10	100	NA	Florence	NA	Northern	Female	0	0.5	0	0	7.5	3.4		0	Trapped	Trapped	0.0833	2148
1238	1238	1992	10	100	NA	Florence	NA	Northern	Female	0	0.5	0	0	7.8	3.5		0	Trapped	Trapped	0.0833	2148
1239	1239	1992	10	100	NA	Douglas	NA	Northern	Female	0	6.5	6	2	21.5	9.8		1	Dogs	Dogs	0.0833	2148
1240	1240	1992	10	100	NA	Douglas	NA	Northern	Male	1	5.5	5		31.1	14.1		1	Dogs	Dogs	0.0833	2148
1241	1241	1992	10	100	NA	Price	NA	Northern	Female	0	0.5	0	0	8.1	3.7		1	Dogs	Dogs	0.0833	2148
1242	1242	1992	10	100	NA	Douglas	NA	Northern	Female	0	5.5	5	0	18.9	8.6		1	Dogs	Dogs	0.0833	2148
1243	1243	1992	10	100	NA	Douglas	NA	Northern	Male	1	4.5	4		26.4	12		1	Dogs	Dogs	0.0833	2148
1244	1244	1992	10	100	NA	Douglas	NA	Northern	Male	1	4.5	4					0	Trapped	Trapped	0.0833	2148
1245	1245	1992	10	100	NA	Douglas	NA	Northern	Female	0	4.5	4	0	12.9	5.9		0	Trapped	Trapped	0.0833	2148
1246	1246	1992	10	100	NA	Douglas	NA	Northern	Female	0	4.5	4	0	15.2	6.9		1	Dogs	Dogs	0.0833	2148
1247	1247	1992	10	100	NA	Douglas	NA	Northern	Male	1	4.5	4		23.4	10.6		1	Dogs	Dogs	0.0833	2148
1248	1248	1992	10	100	NA	Price	NA	Northern	Male	1	1.5	1					1	Dogs	Dogs	0.0833	2148
1249	1249	1992	10	100	NA	Douglas	NA	Northern	Male	1	3.5	3		25.8	11.7		0	Trapped	Trapped	0.0833	2148
1250	1250	1992	10	100	NA	Douglas	NA	Northern	Female	0	2.5	2	2	20.1	9.1		1	Dogs	Dogs	0.0833	2148
1251	1251	1992	10	100	NA	Douglas	NA	Northern	Male	1	1.5	1		20.1	9.1		1	Dogs	Dogs	0.0833	2148
1252	1252	1992	10	100	NA	Douglas	NA	Northern	Male	1	1.5	1		26.4	12		1	Dogs	Dogs	0.0833	2148
1253	1253	1992	10	100	NA	Douglas	NA	Northern	Female	0	1.5	1	2	18	8.2		0	Trapped	Trapped	0.0833	2148
1254	1254	1992	10	100	NA	Douglas	NA	Northern	Female	0	1.5	1	0	16.1	7.3		1	Dogs	Dogs	0.0833	2148
1255	1255	1992	10	100	NA	Price	NA	Northern	Male	1	2.5	2		25.2	11.4		0	Trapped	Trapped	0.0833	2148
1256	1256	1992	10	100	NA	Price	NA	Northern	Female	0	3.5	3	2	18.7	8.5		0	Trapped	Trapped	0.0833	2148
1257	1257	1992	10	100	NA	Douglas	NA	Northern	Female	0	1.5	1	0	16.3	7.4		1	Dogs	Dogs	0.0833	2148
1258	1258	1992	10	100	NA	Douglas	NA	Northern	Male	1	0.5	0		7.2	3.3		NA	NA	NA	0.0833	2148
1259	1259	1992	10	100	NA	Douglas	NA	Northern	Male	1	0.5	0		9.2	4.2		1	Dogs	Dogs	0.0833	2148
1260	1260	1992	10	100	NA	Douglas	NA	Northern	Female	0	0.5	0	0	8.3	3.8		1	Dogs	Dogs	0.0833	2148
1261	1261	1992	10	100	NA	Douglas	NA	Northern	Female	0	0.5	0	0	9.4	4.3		0	Trapped	Trapped	0.0833	2148
1262	1262	1992	10	100	NA	Chippewa	NA	Northern	Male	1	5.5	5	2	17.9	8.1		1	Dogs	Dogs	0.0833	2148
1263	1263	1992	10	100	NA	Chippewa	NA	Northern	Male	1	3.5	3		32.2	14.6		0	Trapped	Trapped	0.0833	2148
1264	1264	1992	10	100	NA	Chippewa	NA	Northern	Male	1	1.5	1		15.9	7.2		1	Dogs	Dogs	0.0833	2148
1265	1265	1992	10	100	NA	Price	NA	Northern	Male	1	11.5	11		13.2	6		0	Trapped	Trapped	0.0833	2148
1266	1266	1992	10	100	NA	Chippewa	NA	Northern	Female	0	1.5	1	0	13.2	6		0	Trapped	Trapped	0.0833	2148
1267	1267	1992	10	100	NA	Burnett	NA	Northern	Female	0	5.5	5	0	19.3	8.8		1	Dogs	Dogs	0.0833	2148
1268	1268	1992	10	100	NA	Rusk	NA	Northern	Male	1	0.5	0		8.4	3.8		1	Dogs	Dogs	0.0833	2148
1269	1269	1992	10	100	NA	Burnett	NA	Northern	Male	1	4.5	4		27.1	12.3		1	Dogs	Dogs	0.0833	2148
1270	1270	1992	10	100	NA	Burnett	NA	Northern	Female	0	4.5	4	1	15.7	7.1		0	Trapped	Trapped	0.0833	2148
1271	1271	1992	10	100	NA	Burnett	NA	Northern	Female	0	3.5	3	3	16.4	7.4		1	Dogs	Dogs	0.0833	2148
1272	1272	1992	10	100	NA	Burnett	NA	Northern	Female	0	2.5	2	2	16.6	7.5		1	Dogs	Dogs	0.0833	2148
1273	1273	1992	10	100	NA	Burnett	NA	Northern	Male	1	1.5	1		17.8	8.1		1	Dogs	Dogs	0.0833	2148
1274	1274	1992	10	100	NA	Burnett	NA	Northern	Female	0	1.5	1	1	17.1	7.8		1	Dogs	Dogs	0.0833	2148
1275	1275	1992	10	100	NA	Rusk	NA	Northern	Female	0	2.5	2	2	15.1	6.8		1	Dogs	Dogs	0.0833	2148
1276	1276	1992	10	100	NA	Burnett	NA	Northern	Male	1	0.5	0					1	Dogs	Dogs	0.0833	2148
1277	1277	1992	10	100	NA	Burnett	NA	Northern	Male	1	NA	NA		18.9	8.6		0	Trapped	Trapped	0.0833	2148
1278	1278	1992	10	100	NA	Bayfield	NA	Northern	Male	1	1.5	1		25.5	11.6		0	Trapped	Trapped	0.0833	2148
1279	1279	1992	10	100	NA	Barron	NA	Northern	Male	1	NA	NA		28.5	12.9		1	Dogs	Dogs	0.0833	2148
1280	1280	1992	10	100	NA	Sawyer	NA	Northern	Male	1	1.5	1		25.5	11.6		1	Dogs	Dogs	0.0833	2148
1281	1281	1992	10	100	NA	Ashland	NA	Northern	Male	1	7.5	7					0	Trapped	Trapped	0.0833	2148
1282	1282	1992	10	100	NA	Ashland	NA	Northern	Male	1	1.5	1		21.5	9.8		0	Trapped	Trapped	0.0833	2148
1283	1283	1992	10	100	NA	Unknown	NA	Northern	Female	0	12.5	12	3	18.1	8.2		NA	NA	NA	0.0833	2148
1284	1284	1992	10	100	NA	Unknown	NA	Northern	Male	1	9.5	9		29.5	13.4		NA	NA	NA	0.0833	2148
1285	1285	1992	10	100	NA	Unknown	NA	Northern	Male	1	4.5	4		22.9	10.4		NA	NA	NA	0.0833	2148
1286	1286	1992	10	100	NA	Unknown	NA	Northern	Male	1	4.5	4		23.8	10.8		NA	NA	NA	0.0833	2148
1287	1287	1992	10	100	NA	Unknown	NA	Northern	Male	1	2.5	2		17.7	8		NA	NA	Other	0.0833	2148
1288	1288	1992	10	100	NA	Unknown	NA	Northern	Male	1	2.5	2		30.8	14		NA	NA	NA	0.0833	2148
1289	1289	1992	10	100	NA	Taylor	NA	Northern	Female	0	0.5	0	0				1	Dogs	Dogs	0.0833	2148
1290	1290	1992	10	100	NA	Taylor	NA	Northern	Female	0	8.5	8	2				1	Dogs	Dogs	0.0833	2148
1291	1291	1992	10	100	NA	Unknown	NA	Northern	Female	0	2.5	2	2				NA	NA	Other	0.0833	2148
1292	1292	1992	10	100	NA	Unknown	NA	Northern	Male	1	1.5	1		23.2	10.5		NA	NA	NA	0.0833	2148
1293	1293	1992	10	100	NA	Unknown	NA	Northern	Female	0	0.5	0	0				NA	NA	NA	0.0833	2148
1294	1294	1992	10	100	NA	Unknown	NA	Northern	Male	1	0.5	0		8.5	3.9		NA	NA	NA	0.0833	2148
1295	1295	1992	10	100	NA	Unknown	NA	Northern	Male	1	0.5	0		11.7	5.3		NA	NA	NA	0.0833	2148
1296	1296	1992	10	100	NA	Washburn	NA	Northern	Male	1	4.5	4		22.2	10.1		1	Dogs	Dogs	0.0833	2148
1297	1297	1992	10	100	NA	Unknown	NA	Northern	Female	0	0.5	0	0	10.5	4.8		NA	NA	NA	0.0833	2148
1298	1298	1992	10	100	NA	Unknown	NA	Northern	Male	1	1.5	1		25.9	11.7		NA	NA	NA	0.0833	2148
1299	1299	1992	10	100	NA	Unknown	NA	Northern	Male	1	1.5	1		26.3	11.9		NA	NA	NA	0.0833	2148
1300	1300	1992	10	100	NA	Unknown	NA	Northern	Male	1	1.5	1		30.3	13.7		NA	NA	NA	0.0833	2148
1301	1301	1992	10	100	NA	Unknown	NA	Northern	Female	0	2.5	2	0	13.3	6		NA	NA	NA	0.0833	2148
1302	1302	1992	10	100	NA	Unknown	NA	Northern	Female	0	2.5	2	4	23.4	10.6		NA	NA	NA	0.0833	2148
1303	1303	1992	10	100	NA	Unknown	NA	Northern	Male	1	2.5	2	3	31.1	14.1		NA	NA	NA	0.0833	2148
1304	1304	1992	10	100	NA	Unknown	NA	Northern	Male	1	4.5	4		25.7	11.7		NA	NA	NA	0.0833	2148
1305	1305	1992	10	100	NA	Unknown	NA	Northern	Female	0	5.5	5	3	27.4	12.4		NA	NA	NA	0.0833	2148
1306	1306	1992	10	100	NA	Unknown	NA	Northern	Male	1	5.5	5		26.9	12.2		NA	NA	NA	0.0833	2148
1307	1307	1992	10	100	NA	Unknown	NA	Northern	Male	1	5.5	5		33.2	15.1		NA	NA	NA	0.0833	2148
1308	1308	1992	10	100	NA	Washburn	NA	Northern	Female	0	11.5	11	4	27.8	12.6		1	Dogs	Dogs	0.0833	2148
1309	1309	1992	10	100	NA	Washburn	NA	Northern	Male	1	2.5	2					1	Dogs	Dogs	0.0833	2148
1310	1310	1992	10	100	NA	Washburn	NA	Northern	Male	1	2.5	2		23.6	10.7		1	Dogs	Dogs	0.0833	2148
1311	1311	1992	10	100	NA	Washburn	NA	Northern	Male	1	1.5	1		23.4	10.6		1	Dogs	Dogs	0.0833	2148
1312	1312	1992	10	100	NA	Washburn	NA	Northern	Male	1	NA	NA					1	Dogs	Dogs	0.0833	2148
1313	1313	1992	10	100	NA	Washburn	NA	Northern	Male	1	NA	NA		20.1	9.1		NA	NA	NA	0.0833	2148
1314	1314	1992	10	100	NA	Vilas	NA	Northern	Male	1	1.5	1		26.6	12.1		1	Dogs	Dogs	0.0833	2148
1315	1315	1992	10	100	NA	Vilas	NA	Northern	Male	1	0.5	0					0	Trapped	Trapped	0.0833	2148
1316	1316	1992	10	100	NA	Taylor	NA	Northern	Male	1	3.5	3		26.2	11.9		0	Trapped	Trapped	0.0833	2148
1317	1317	1992	10	100	NA	Taylor	NA	Northern	Male	1	1.5	1					0	Trapped	Trapped	0.0833	2148
1318	1318	1992	10	100	NA	Taylor	NA	Northern	Male	1	0.5	0		10.2	4.6		1	Dogs	Dogs	0.0833	2148
1319	1319	1992	10	100	NA	Sawyer	NA	Northern	Female	0	5.5	5	2	21.6	9.8		0	Trapped	Trapped	0.0833	2148
1320	1320	1992	10	100	NA	Sawyer	NA	Northern	Female	0	3.5	3	4	21.4	9.7		NA	NA	NA	0.0833	2148
1321	1321	1992	10	100	NA	Sawyer	NA	Northern	Male	1	2.5	2		23.2	10.5		1	Dogs	Dogs	0.0833	2148
1322	1322	1992	10	100	NA	Sawyer	NA	Northern	Female	0	1.5	1	3	18.3	8.3		1	Dogs	Dogs	0.0833	2148
1323	1323	1992	10	100	NA	Sawyer	NA	Northern	Female	0	1.5	1	0	14.2	6.4		NA	NA	Other	0.0833	2148
1324	1324	1992	10	100	NA	Sawyer	NA	Northern	Male	1	0.5	0		9.5	4.3		0	Trapped	Trapped	0.0833	2148
1325	1325	1992	10	100	NA	Sawyer	NA	Northern	Male	1	NA	NA		36.4	16.5		1	Dogs	Dogs	0.0833	2148
1326	1326	1992	10	100	NA	Rusk	NA	Northern	Female	0	8.5	8	1	22.3	10.1		1	Dogs	Dogs	0.0833	2148
1327	1327	1992	10	100	NA	Rusk	NA	Northern	Male	1	6.5	6		24.3	11		NA	NA	Other	0.0833	2148
1328	1328	1992	10	100	NA	Rusk	NA	Northern	Male	1	5.5	5		22.1	10		1	Dogs	Dogs	0.0833	2148
1329	1329	1992	10	100	NA	Rusk	NA	Northern	Female	0	1.5	1	0	12.4	5.6		0	Trapped	Trapped	0.0833	2148
1330	1330	1992	10	100	NA	Rusk	NA	Northern	Female	0	1.5	1	2				1	Dogs	Dogs	0.0833	2148
1331	1331	1992	10	100	NA	Rusk	NA	Northern	Male	1	0.5	0		10.3	4.7		1	Dogs	Dogs	0.0833	2148
1332	1332	1992	10	100	NA	Rusk	NA	Northern	Female	0	0.5	0	0	10.4	4.7		1	Dogs	Dogs	0.0833	2148
1333	1333	1992	10	100	NA	Rusk	NA	Northern	Male	1	NA	NA		26.2	11.9		1	Dogs	Dogs	0.0833	2148
1334	1334	1992	10	100	NA	Price	NA	Northern	Female	0	15.5	15	2	22	10		0	Trapped	Trapped	0.0833	2148
1335	1335	1992	10	100	NA	Price	NA	Northern	Female	0	9.5	9	0	20.5	9.3		0	Trapped	Trapped	0.0833	2148
1336	1336	1992	10	100	NA	Price	NA	Northern	Female	0	9.5	9	2	16	7.3		NA	NA	Other	0.0833	2148
1337	1337	1992	10	100	NA	Price	NA	Northern	Female	0	5.5	5	0	14.6	6.6		1	Dogs	Dogs	0.0833	2148
1338	1338	1992	10	100	NA	Price	NA	Northern	Female	0	5.5	5					1	Dogs	Dogs	0.0833	2148
1339	1339	1992	10	100	NA	Price	NA	Northern	Male	1	4.5	4		15.9	7.2		0	Trapped	Trapped	0.0833	2148
1340	1340	1992	10	100	NA	Price	NA	Northern	Male	1	4.5	4		28.9	13.1		0	Trapped	Trapped	0.0833	2148
1341	1341	1992	10	100	NA	Price	NA	Northern	Female	0	4.5	4	3	18.5	8.4		0	Trapped	Trapped	0.0833	2148
1342	1342	1992	10	100	NA	Price	NA	Northern	Female	0	3.5	3	1	14.7	6.7		0	Trapped	Trapped	0.0833	2148
1343	1343	1992	10	100	NA	Price	NA	Northern	Male	1	2.5	2		29.8	13.5		0	Trapped	Trapped	0.0833	2148
1344	1344	1992	10	100	NA	Price	NA	Northern	Male	1	2.5	2		30.8	14		1	Dogs	Dogs	0.0833	2148
1345	1345	1992	10	100	NA	Price	NA	Northern	Male	1	2.5	2		32.1	14.6		1	Dogs	Dogs	0.0833	2148
1346	1346	1992	10	100	NA	Price	NA	Northern	Female	0	2.5	2	0	14.4	6.5		NA	NA	Other	0.0833	2148
1347	1347	1992	10	100	NA	Price	NA	Northern	Male	1	1.5	1		10.7	4.9		0	Trapped	Trapped	0.0833	2148
1348	1348	1992	10	100	NA	Price	NA	Northern	Male	1	1.5	1		13.1	5.9		0	Trapped	Trapped	0.0833	2148
1349	1349	1992	10	100	NA	Price	NA	Northern	Female	0	1.5	1		24.1	10.9		0	Trapped	Trapped	0.0833	2148
1350	1350	1992	10	100	NA	Price	NA	Northern	Female	0	1.5	1	0	14.2	6.4		0	Trapped	Trapped	0.0833	2148
1351	1351	1992	10	100	NA	Price	NA	Northern	Male	1	0.5	0		9.6	4.4		0	Trapped	Trapped	0.0833	2148
1352	1352	1992	10	100	NA	Price	NA	Northern	Male	1	0.5	0		10.9	4.9		0	Trapped	Trapped	0.0833	2148
1353	1353	1992	10	100	NA	Price	NA	Northern	Male	1	0.5	0		12.6	5.7		1	Dogs	Dogs	0.0833	2148
1354	1354	1992	10	100	NA	Price	NA	Northern	Male	1	0.5	0		12.9	5.9		0	Trapped	Trapped	0.0833	2148
1355	1355	1992	10	100	NA	Price	NA	Northern	Female	0	0.5	0	0	8.5	3.9		1	Dogs	Dogs	0.0833	2148
1356	1356	1992	10	100	NA	Price	NA	Northern	Female	0	0.5	0	0	10.3	4.7		0	Trapped	Trapped	0.0833	2148
1357	1357	1992	10	100	NA	Price	NA	Northern	Male	1	NA	NA					1	Dogs	Dogs	0.0833	2148
1358	1358	1992	10	100	NA	Polk	NA	Northern	Male	1	1.5	1		24.9	11.3		1	Dogs	Dogs	0.0833	2148
1359	1359	1992	10	100	NA	Oneida	NA	Northern	Female	0	8.5	8	3	17.5	7.9		1	Dogs	Dogs	0.0833	2148
1360	1360	1992	10	100	NA	Oneida	NA	Northern	Male	1	4.5	4		29.6	13.4		1	Dogs	Dogs	0.0833	2148
1361	1361	1992	10	100	NA	Oneida	NA	Northern	Male	1	3.5	3		28.3	12.8		1	Dogs	Dogs	0.0833	2148
1362	1362	1992	10	100	NA	Oneida	NA	Northern	Male	1	2.5	2					0	Trapped	Trapped	0.0833	2148
1363	1363	1992	10	100	NA	Oneida	NA	Northern	Male	1	2.5	2		22.5	10.2		1	Dogs	Dogs	0.0833	2148
1364	1364	1992	10	100	NA	Oneida	NA	Northern	Male	1	2.5	2		24.6	11.2		1	Dogs	Dogs	0.0833	2148
1365	1365	1992	10	100	NA	Oneida	NA	Northern	Male	1	1.5	1		25.3	11.5		1	Dogs	Dogs	0.0833	2148
1366	1366	1992	10	100	NA	Oneida	NA	Northern	Female	0	1.5	1	0	16.8	7.6		0	Trapped	Trapped	0.0833	2148
1367	1367	1992	10	100	NA	Oneida	NA	Northern	Male	1	0.5	0		8.3	3.8		1	Dogs	Dogs	0.0833	2148
1368	1368	1992	10	100	NA	Oneida	NA	Northern	Male	1	NA	NA					1	Dogs	Dogs	0.0833	2148
1369	1369	1992	10	100	NA	Oneida	NA	Northern	Male	1	NA	NA		25.7	11.7		1	Dogs	Dogs	0.0833	2148
1370	1370	1992	10	100	NA	Oneida	NA	Northern	Female	0	NA	NA	0	18.2	8.3		1	Dogs	Dogs	0.0833	2148
1371	1371	1992	10	100	NA	Oconto	NA	Northern	Female	0	0.5	0	0	6.7	3		0	Trapped	Trapped	0.0833	2148
1372	1372	1992	10	100	NA	Oconto	NA	Northern	Female	0	0.5	0	0	10.6	4.8		1	Dogs	Dogs	0.0833	2148
1373	1373	1992	10	100	NA	Marinette	NA	Northern	Male	1	3.5	3		21.7	9.8		0	Trapped	Trapped	0.0833	2148
1374	1374	1992	10	100	NA	Marinette	NA	Northern	Male	1	3.5	3		30.5	13.8		0	Trapped	Trapped	0.0833	2148
1375	1375	1992	10	100	NA	Marinette	NA	Northern	Female	0	3.5	3	3	21.6	9.8		1	Dogs	Dogs	0.0833	2148
1376	1402	1993	11	121	NA	Forest	NA	Northern	Male	1	1.5	1		25.2	11.4		0	Trapped	Trapped	0.1269	1744
1377	1416	1993	11	121	NA	Vilas	NA	Northern	Male	1	2.5	2		40.5	18.4		1	Dogs	Dogs	0.1269	1744
1378	1430	1993	11	121	NA	Florence	NA	Northern	Female	0	0.5	0	0	10.8	4.9		0	Trapped	Trapped	0.1269	1744
1379	1431	1993	11	121	NA	Forest	NA	Northern	Male	1	14.5	14		25.2	11.4		1	Dogs	Dogs	0.1269	1744
1380	1504	1993	11	121	NA	Oconto	NA	Northern	Male	1	0.5	0		14.3	6.5		1	Dogs	Dogs	0.1269	1744
1381	1450	1993	11	121	NA	Taylor	NA	Northern	Male	1	2.5	2		18.3	8.3		NA	NA	Other	0.1269	1744
1382	1445	1993	11	121	NA	Forest	NA	Northern	Male	1	0.5	0		12.5	5.7		0	Trapped	Trapped	0.1269	1744
1383	1448	1993	11	121	NA	Unknown	NA	Northern	Male	1	0.5	0		6.6	3		NA	NA	Other	0.1269	1744
1384	1503	1993	11	121	NA	Forest	NA	Northern	Male	1	1.5	1		20.2	9.2		1	Dogs	Dogs	0.1269	1744
1385	1399	1993	11	121	NA	Price	NA	Northern	Female	0	5.5	5	2	18.8	8.5		1	Dogs	Dogs	0.1269	1744
1386	1400	1993	11	121	NA	Langlade	NA	Northern	Male	1	NA	NA		20.2	9.2		1	Dogs	Dogs	0.1269	1744
1387	1414	1993	11	121	NA	Unknown	NA	Northern	Male	1	1.5	1		25.5	11.6		1	Dogs	Dogs	0.1269	1744
1388	1428	1993	11	121	NA	Unknown	NA	Northern	Male	1	2.5	2		27.2	12.3		NA	NA	Other	0.1269	1744
1389	1435	1993	11	121	NA	Iron	NA	Northern	Male	1	4.5	4		30	13.6		1	Dogs	Dogs	0.1269	1744
1390	1442	1993	11	121	NA	Sawyer	NA	Northern	Female	0	0.5	0	0	7.1	3.2		NA	NA	Other	0.1269	1744
1391	1446	1993	11	121	NA	Washburn	NA	Northern	Female	0	0.5	0	0	10.8	4.9		1	Dogs	Dogs	0.1269	1744
1392	1447	1993	11	121	NA	Forest	NA	Northern	Male	1	NA	NA		28.5	12.9		1	Dogs	Dogs	0.1269	1744
1393	1451	1993	11	121	NA	Washburn	NA	Northern	Male	1	1.5	1		14.2	6.4		NA	NA	Other	0.1269	1744
1394	1454	1993	11	121	NA	Sawyer	NA	Northern	Female	0	2.5	2	0	17.8	8.1		0	Trapped	Trapped	0.1269	1744
1395	1457	1993	11	121	NA	Sawyer	NA	Northern	Female	0	3.5	3	0	16.8	7.6		0	Trapped	Trapped	0.1269	1744
1396	1471	1993	11	121	NA	Price	NA	Northern	Male	1	4.5	4		31.5	14.3		0	Trapped	Trapped	0.1269	1744
1397	1507	1993	11	121	NA	Forest	NA	Northern	Female	0	1.5	1	0	17.1	7.8		0	Trapped	Trapped	0.1269	1744
1398	1509	1993	11	121	NA	Washburn	NA	Northern	Male	1	3.5	3		26.1	11.8		NA	NA	Other	0.1269	1744
1399	1381	1993	11	121	NA	Marinette	NA	Northern	Male	1	1.5	1		17.4	7.9		0	Trapped	Trapped	0.1269	1744
1400	1395	1993	11	121	NA	Washburn	NA	Northern	Male	1	1.5	1		21.5	9.8		NA	NA	Other	0.1269	1744
1401	1406	1993	11	121	NA	Unknown	NA	Northern	Male	1	0.5	0		12.4	5.6		NA	NA	Other	0.1269	1744
1402	1475	1993	11	121	NA	Florence	NA	Northern	Female	0	0.5	0	0	10.1	4.6		NA	NA	Other	0.1269	1744
1403	1497	1993	11	121	NA	Forest	NA	Northern	Female	0	4.5	4	0	22.4	10.2		1	Dogs	Dogs	0.1269	1744
1404	1376	1993	11	121	NA	Forest	NA	Northern	Female	0	2.5	2		17.7	8		0	Trapped	Trapped	0.1269	1744
1405	1380	1993	11	121	NA	Sawyer	NA	Northern	Male	1	NA	NA		29.7	13.5		0	Trapped	Trapped	0.1269	1744
1406	1383	1993	11	121	NA	Marinette	NA	Northern	Female	0	4.5	4	2	14.5	6.6		1	Dogs	Dogs	0.1269	1744
1407	1384	1993	11	121	NA	Washburn	NA	Northern	Male	1	9.5	9		27.8	12.6		1	Dogs	Dogs	0.1269	1744
1408	1409	1993	11	121	NA	Chippewa	NA	Northern	Male	1	1.5	1		23.1	10.5		NA	NA	Other	0.1269	1744
1409	1411	1993	11	121	NA	Ashland	NA	Northern	Female	0	5.5	5	3	18.9	8.6		0	Trapped	Trapped	0.1269	1744
1410	1419	1993	11	121	NA	Marinette	NA	Northern	Male	1	1.5	1		21.5	9.8		0	Trapped	Trapped	0.1269	1744
1411	1422	1993	11	121	NA	Unknown	NA	Northern	Male	1	0.5	0		10.2	4.6		NA	NA	Other	0.1269	1744
1412	1438	1993	11	121	NA	Oconto	NA	Northern	Female	0	2.5	2	1	20.3	9.2		0	Trapped	Trapped	0.1269	1744
1413	1443	1993	11	121	NA	Dunn	NA	Northern	Male	1	NA	NA		29.7	13.5		NA	NA	Other	0.1269	1744
1414	1470	1993	11	121	NA	Lincoln	NA	Northern	Female	0	10.5	10	0	14.7	6.7		NA	NA	Other	0.1269	1744
1415	1476	1993	11	121	NA	Dunn	NA	Northern	Female	0	0.5	0	0	9.6	4.4		NA	NA	Other	0.1269	1744
1416	1479	1993	11	121	NA	Unknown	NA	Northern	Female	0	2.5	2		11.8	5.4		NA	NA	Other	0.1269	1744
1417	1481	1993	11	121	NA	Vilas	NA	Northern	Male	1	3.5	3		18.4	8.3		0	Trapped	Trapped	0.1269	1744
1418	1488	1993	11	121	NA	Unknown	NA	Northern	Male	1	2.5	2		31.7	14.4		NA	NA	Other	0.1269	1744
1419	1493	1993	11	121	NA	Oneida	NA	Northern	Female	0	3.5	3	0	16.2	7.3		1	Dogs	Dogs	0.1269	1744
1420	1498	1993	11	121	NA	Lincoln	NA	Northern	Male	1	0.5	0		15.1	6.8		1	Dogs	Dogs	0.1269	1744
1421	1499	1993	11	121	NA	Lincoln	NA	Northern	Female	0	0.5	0	0	12.3	5.6		NA	NA	Other	0.1269	1744
1422	1377	1993	11	121	NA	Unknown	NA	Northern	Female	0	NA	NA	1	15.2	6.9		NA	NA	Other	0.1269	1744
1423	1401	1993	11	121	NA	Iron	NA	Northern	Male	1	3.5	3					NA	NA	Other	0.1269	1744
1424	1485	1993	11	121	NA	Florence	NA	Northern	Male	1	0.5	0		16.2	7.3		1	Dogs	Dogs	0.1269	1744
1425	1404	1993	11	121	NA	Sawyer	NA	Northern	Male	1	3.5	3		23.6	10.7		1	Dogs	Dogs	0.1269	1744
1426	1408	1993	11	121	NA	Sawyer	NA	Northern	Male	1	NA	NA		14.6	6.6		1	Dogs	Dogs	0.1269	1744
1427	1483	1993	11	121	NA	Price	NA	Northern	Female	0	3.5	3	2	17.6	8		0	Trapped	Trapped	0.1269	1744
1428	1392	1993	11	121	NA	Douglas	NA	Northern	Male	1	3.5	3		29	13.2		1	Dogs	Dogs	0.1269	1744
1429	1393	1993	11	121	NA	Douglas	NA	Northern	Male	1	4.5	4		27.7	12.6		1	Dogs	Dogs	0.1269	1744
1430	1421	1993	11	121	NA	Iron	NA	Northern	Male	1	1.5	1		29.8	13.5		1	Dogs	Dogs	0.1269	1744
1431	1427	1993	11	121	NA	Ashland	NA	Northern	Male	1	2.5	2		23.8	10.8		0	Trapped	Trapped	0.1269	1744
1432	1436	1993	11	121	NA	Oneida	NA	Northern	Female	0	13.5	13	2	22.1	10		1	Dogs	Dogs	0.1269	1744
1433	1441	1993	11	121	NA	Langlade	NA	Northern	Male	1	1.5	1		23.9	10.8		0	Trapped	Trapped	0.1269	1744
1434	1508	1993	11	121	NA	Marinette	NA	Northern	Male	1	3.5	3		23.8	10.8		0	Trapped	Trapped	0.1269	1744
1435	1378	1993	11	121	NA	Price	NA	Northern	Female	0	2.5	2	0	18	8.2		0	Trapped	Trapped	0.1269	1744
1436	1387	1993	11	121	NA	Florence	NA	Northern	Female	0	0.5	0	0	9.6	4.4		1	Dogs	Dogs	0.1269	1744
1437	1388	1993	11	121	NA	Oneida	NA	Northern	Male	1	3.5	3		27.8	12.6		1	Dogs	Dogs	0.1269	1744
1438	1501	1993	11	121	NA	Langlade	NA	Northern	Male	1	1.5	1		20.7	9.4		1	Dogs	Dogs	0.1269	1744
1439	1469	1993	11	121	NA	Forest	NA	Northern	Male	1	2.5	2		32.1	14.6		1	Dogs	Dogs	0.1269	1744
1440	1472	1993	11	121	NA	Washburn	NA	Northern	Female	0	3.5	3	0	18.1	8.2		1	Dogs	Dogs	0.1269	1744
1441	1473	1993	11	121	NA	Forest	NA	Northern	Female	0	2.5	2	2	19.4	8.8		1	Dogs	Dogs	0.1269	1744
1442	1477	1993	11	121	NA	Rusk	NA	Northern	Female	0	5.5	5	0	20.6	9.3		NA	NA	Other	0.1269	1744
1443	1506	1993	11	121	NA	Rusk	NA	Northern	Male	1	5.5	5		30.6	13.9		1	Dogs	Dogs	0.1269	1744
1444	1391	1993	11	121	NA	Douglas	NA	Northern	Female	0	5.5	5	0	19.9	9		1	Dogs	Dogs	0.1269	1744
1445	1403	1993	11	121	NA	Unknown	NA	Northern	Male	1	0.5	0		6.8	3.1		NA	NA	Other	0.1269	1744
1446	1407	1993	11	121	NA	Unknown	NA	Northern	Female	0	2.5	2	0	11.2	5.1		NA	NA	Other	0.1269	1744
1447	1420	1993	11	121	NA	Ashland	NA	Northern	Female	0	1.5	1	0	19.1	8.7		0	Trapped	Trapped	0.1269	1744
1448	1423	1993	11	121	NA	Unknown	NA	Northern	Male	1	1.5	1		27.6	12.5		NA	NA	Other	0.1269	1744
1449	1425	1993	11	121	NA	Price	NA	Northern	Male	1	3.5	3		28	12.7		1	Dogs	Dogs	0.1269	1744
1450	1426	1993	11	121	NA	Forest	NA	Northern	Male	1	13.5	13		29.7	13.5		1	Dogs	Dogs	0.1269	1744
1451	1429	1993	11	121	NA	Oneida	NA	Northern	Female	0	2.5	2	1	17.7	8		0	Trapped	Trapped	0.1269	1744
1452	1437	1993	11	121	NA	Lincoln	NA	Northern	Male	1	5.5	5		25.8	11.7		1	Dogs	Dogs	0.1269	1744
1453	1449	1993	11	121	NA	Forest	NA	Northern	Female	0	3.5	3	2	21	9.5		0	Trapped	Trapped	0.1269	1744
1454	1474	1993	11	121	NA	Oneida	NA	Northern	Female	0	0.5	0	0	10.7	4.9		0	Trapped	Trapped	0.1269	1744
1455	1464	1993	11	121	NA	Unknown	NA	Northern	Male	1	0.5	0		9.7	4.4		NA	NA	Other	0.1269	1744
1456	1398	1993	11	121	NA	Forest	NA	Northern	Female	0	0.5	0	0	8.2	3.7		NA	NA	Other	0.1269	1744
1457	1405	1993	11	121	NA	Oneida	NA	Northern	Male	1	1.5	1		22	10		1	Dogs	Dogs	0.1269	1744
1458	1418	1993	11	121	NA	Oneida	NA	Northern	Female	0	3.5	3	0	21.6	9.8		NA	NA	Other	0.1269	1744
1459	1432	1993	11	121	NA	Lincoln	NA	Northern	Female	0	0.5	0	0	11.8	5.4		0	Trapped	Trapped	0.1269	1744
1460	1433	1993	11	121	NA	Douglas	NA	Northern	Male	1	3.5	3		20.2	9.2		0	Trapped	Trapped	0.1269	1744
1461	1434	1993	11	121	NA	Oneida	NA	Northern	Female	0	0.5	0	0	9.3	4.2		1	Dogs	Dogs	0.1269	1744
1462	1444	1993	11	121	NA	Ashland	NA	Northern	Female	0	0.5	0	0	6.7	3		0	Trapped	Trapped	0.1269	1744
1463	1458	1993	11	121	NA	Ashland	NA	Northern	Female	0	3.5	3	0	15.6	7.1		0	Trapped	Trapped	0.1269	1744
1464	1482	1993	11	121	NA	Price	NA	Northern	Female	0	1.5	1	0	14.9	6.8		0	Trapped	Trapped	0.1269	1744
1465	1492	1993	11	121	NA	Price	NA	Northern	Female	0	1.5	1	0	17.9	8.1		0	Trapped	Trapped	0.1269	1744
1466	1412	1993	11	121	NA	Price	NA	Northern	Female	0	1.5	1	2	20	9.1		0	Trapped	Trapped	0.1269	1744
1467	1413	1993	11	121	NA	Florence	NA	Northern	Female	0	5.5	5	2	15.6	7.1		NA	NA	Other	0.1269	1744
1468	1460	1993	11	121	NA	Douglas	NA	Northern	Male	1	3.5	3		14	6.4		1	Dogs	Dogs	0.1269	1744
1469	1461	1993	11	121	NA	Lincoln	NA	Northern	Female	0	0.5	0	0	8.5	3.9		0	Trapped	Trapped	0.1269	1744
1470	1467	1993	11	121	NA	Oneida	NA	Northern	Male	1	2.5	2		22.8	10.3		1	Dogs	Dogs	0.1269	1744
1471	1396	1993	11	121	NA	Forest	NA	Northern	Female	0	8.5	8	0	19.4	8.8		1	Dogs	Dogs	0.1269	1744
1472	1397	1993	11	121	NA	Unknown	NA	Northern	Female	0	1.5	1	0	19.3	8.8		NA	NA	Other	0.1269	1744
1473	1453	1993	11	121	NA	Unknown	NA	Northern	Male	1	2.5	2		24.6	11.2		NA	NA	Other	0.1269	1744
1474	1456	1993	11	121	NA	Lincoln	NA	Northern	Female	0	5.5	5	0	17.2	7.8		0	Trapped	Trapped	0.1269	1744
1475	1459	1993	11	121	NA	Douglas	NA	Northern	Male	1	3.5	3		28.7	13		NA	NA	Other	0.1269	1744
1476	1486	1993	11	121	NA	Forest	NA	Northern	Male	1	0.5	0		10.7	4.9		1	Dogs	Dogs	0.1269	1744
1477	1490	1993	11	121	NA	Price	NA	Northern	Female	0	1.5	1	0	18.6	8.4		0	Trapped	Trapped	0.1269	1744
1478	1491	1993	11	121	NA	Unknown	NA	Northern	Female	0	1.5	1	0	14.7	6.7		NA	NA	Other	0.1269	1744
1479	1500	1993	11	121	NA	Burnett	NA	Northern	Female	0	2.5	2	0	17.3	7.8		1	Dogs	Dogs	0.1269	1744
1480	1478	1993	11	121	NA	Douglas	NA	Northern	Male	1	2.5	2		26.7	12.1		1	Dogs	Dogs	0.1269	1744
1481	1385	1993	11	121	NA	Douglas	NA	Northern	Female	0	2.5	2	1	18.8	8.5		1	Dogs	Dogs	0.1269	1744
1482	1389	1993	11	121	NA	Burnett	NA	Northern	Female	0	2.5	2	0	21.4	9.7		1	Dogs	Dogs	0.1269	1744
1483	1410	1993	11	121	NA	Oneida	NA	Northern	Female	0	1.5	1	0	16.2	7.3		1	Dogs	Dogs	0.1269	1744
1484	1455	1993	11	121	NA	Bayfield	NA	Northern	Male	1	3.5	3		27.6	12.5		1	Dogs	Dogs	0.1269	1744
1485	1487	1993	11	121	NA	Douglas	NA	Northern	Female	0	3.5	3	0	18.8	8.5		1	Dogs	Dogs	0.1269	1744
1486	1489	1993	11	121	NA	Unknown	NA	Northern	Female	0	2.5	2	0	15.9	7.2		NA	NA	Other	0.1269	1744
1487	1494	1993	11	121	NA	Sawyer	NA	Northern	Male	1	0.5	0		13.4	6.1		0	Trapped	Trapped	0.1269	1744
1488	1495	1993	11	121	NA	Douglas	NA	Northern	Male	1	2.5	2		32.2	14.6		1	Dogs	Dogs	0.1269	1744
1489	1502	1993	11	121	NA	Forest	NA	Northern	Female	0	1.5	1	0	12.5	5.7		NA	NA	Other	0.1269	1744
1490	1379	1993	11	121	NA	Washburn	NA	Northern	Male	1	0.5	0		9.6	4.4		1	Dogs	Dogs	0.1269	1744
1491	1382	1993	11	121	NA	Sawyer	NA	Northern	Male	1	3.5	3		32.7	14.8		1	Dogs	Dogs	0.1269	1744
1492	1386	1993	11	121	NA	Douglas	NA	Northern	Female	0	1.5	1	0	17.4	7.9		1	Dogs	Dogs	0.1269	1744
1493	1390	1993	11	121	NA	Price	NA	Northern	Male	1	0.5	0		11	5		0	Trapped	Trapped	0.1269	1744
1494	1394	1993	11	121	NA	Sawyer	NA	Northern	Male	1	3.5	3		23.3	10.6		NA	NA	Other	0.1269	1744
1495	1415	1993	11	121	NA	Rusk	NA	Northern	Male	1	0.5	0					NA	NA	Other	0.1269	1744
1496	1417	1993	11	121	NA	Rusk	NA	Northern	Female	0	3.5	3	1	17	7.7		NA	NA	Other	0.1269	1744
1497	1424	1993	11	121	NA	Unknown	NA	Northern	Male	1	1.5	1		33	15		NA	NA	Other	0.1269	1744
1498	1439	1993	11	121	NA	Unknown	NA	Northern	Male	1	3.5	3		21.7	9.8		NA	NA	Other	0.1269	1744
1499	1440	1993	11	121	NA	Polk	NA	Northern	Female	0	1.5	1		13.5	6.1		NA	NA	Other	0.1269	1744
1500	1452	1993	11	121	NA	Forest	NA	Northern	Female	0	1.5	1	4	16	7.3		1	Dogs	Dogs	0.1269	1744
1501	1462	1993	11	121	NA	Unknown	NA	Northern	Male	1	5.5	5		31.8	14.4		NA	NA	Other	0.1269	1744
1502	1463	1993	11	121	NA	Unknown	NA	Northern	Female	0	1.5	1	0	16	7.3		NA	NA	Other	0.1269	1744
1503	1465	1993	11	121	NA	Rusk	NA	Northern	Female	0	1.5	1	0	18	8.2		NA	NA	Other	0.1269	1744
1504	1466	1993	11	121	NA	Unknown	NA	Northern	Male	1	2.5	2		31	14.1		NA	NA	Other	0.1269	1744
1505	1468	1993	11	121	NA	Oconto	NA	Northern	Male	1	5.5	5		31.9	14.5		NA	NA	Other	0.1269	1744
1506	1480	1993	11	121	NA	Forest	NA	Northern	Male	1	3.5	3		30.4	13.8		1	Dogs	Dogs	0.1269	1744
1507	1484	1993	11	121	NA	Douglas	NA	Northern	Female	0	0.5	0	0	17.4	7.9		NA	NA	Other	0.1269	1744
1508	1496	1993	11	121	NA	Oconto	NA	Northern	Male	1	1.5	1		22.1	10		1	Dogs	Dogs	0.1269	1744
1509	1505	1993	11	121	NA	Oconto	NA	Northern	Male	1	0.5	0		14.1	6.4		1	Dogs	Dogs	0.1269	1744
1510	1510	1993	11	121	NA	Oneida	NA	Northern	Male	1	0.5	0		11	5		1	Dogs	Dogs	0.1269	1744
1511	1589	1994	12	144	NA	Oneida	NA	Northern	Male	1	0.5	0		9.9	4.5		0	Trapped	Trapped	0.1027	1891
1512	1665	1994	12	144	NA	Price	NA	Northern	Male	1	4.5	4		26.4	12		1	Dogs	Dogs	0.1027	1891
1513	1652	1994	12	144	NA	Iron	NA	Northern	Male	1	0.5	0		15.5	7		1	Dogs	Dogs	0.1027	1891
1514	1655	1994	12	144	NA	Iron	NA	Northern	Female	0	1.5	1	0	17.6	8		1	Dogs	Dogs	0.1027	1891
1515	1659	1994	12	144	NA	Price	NA	Northern	Male	1	3.5	3		21.4	9.7		1	Dogs	Dogs	0.1027	1891
1516	1554	1994	12	144	NA	Price	NA	Northern	Male	1	4.5	4		30	13.6		0	Trapped	Trapped	0.1027	1891
1517	1623	1994	12	144	NA	Sawyer	NA	Northern	Male	1	1.5	1		28.2	12.8		1	Dogs	Dogs	0.1027	1891
1518	1627	1994	12	144	NA	Price	NA	Northern	Female	0	1.5	1	0	16	7.3		0	Trapped	Trapped	0.1027	1891
1519	1633	1994	12	144	NA	Price	NA	Northern	Male	1	3.5	3		26.8	12.2		0	Trapped	Trapped	0.1027	1891
1520	1657	1994	12	144	NA	Price	NA	Northern	Female	0	1.5	1	0	17.1	7.8		1	Dogs	Dogs	0.1027	1891
1521	1530	1994	12	144	NA	Unknown	NA	Northern	Male	1	1.5	1		23.2	10.5		NA	NA	Other	0.1027	1891
1522	1624	1994	12	144	NA	Unknown	NA	Northern	Male	1	0.5	0		9.4	4.3		NA	NA	Other	0.1027	1891
1523	1625	1994	12	144	NA	Sawyer	NA	Northern	Female	0	0.5	0	0	10	4.5		1	Dogs	Dogs	0.1027	1891
1524	1626	1994	12	144	NA	Langlade	NA	Northern	Female	0	1.5	1	0	14.5	6.6		0	Trapped	Trapped	0.1027	1891
1525	1634	1994	12	144	NA	Unknown	NA	Northern	Female	0	5.5	5	0	14.2	6.4		NA	NA	Other	0.1027	1891
1526	1515	1994	12	144	NA	Unknown	NA	Northern	Female	0	7.5	7	1	22	10		NA	NA	Other	0.1027	1891
1527	1545	1994	12	144	NA	Burnett	NA	Northern	Male	1	2.5	2		22.8	10.3		NA	NA	Other	0.1027	1891
1528	1556	1994	12	144	NA	Douglas	NA	Northern	Male	1	4.5	4		33.6	15.2		1	Dogs	Dogs	0.1027	1891
1529	1586	1994	12	144	NA	Douglas	NA	Northern	Male	1	5.5	5		25.4	11.5		1	Dogs	Dogs	0.1027	1891
1530	1588	1994	12	144	NA	Douglas	NA	Northern	Male	1	3.5	3		24.6	11.2		1	Dogs	Dogs	0.1027	1891
1531	1592	1994	12	144	NA	Burnett	NA	Northern	Male	1	2.5	2		25.7	11.7		NA	NA	Other	0.1027	1891
1532	1640	1994	12	144	NA	Unknown	NA	Northern	Male	1	6.5	6		30	13.6		NA	NA	Other	0.1027	1891
1533	1644	1994	12	144	NA	Unknown	NA	Northern	Female	0	0.5	0	0				NA	NA	Other	0.1027	1891
1534	1656	1994	12	144	NA	Lincoln	NA	Northern	Female	0	6.5	6	6	21.3	9.7		0	Trapped	Trapped	0.1027	1891
1535	1514	1994	12	144	NA	Unknown	NA	Northern	Male	1	0.5	0		14.8	6.7		NA	NA	Other	0.1027	1891
1536	1532	1994	12	144	NA	Marinette	NA	Northern	Female	0	0.5	0	0	10.8	4.9		1	Dogs	Dogs	0.1027	1891
1537	1534	1994	12	144	NA	Forest	NA	Northern	Male	1	5.5	5		30	13.6		0	Trapped	Trapped	0.1027	1891
1538	1552	1994	12	144	NA	Burnett	NA	Northern	Male	1	3.5	3		33	15		NA	NA	Other	0.1027	1891
1539	1553	1994	12	144	NA	Douglas	NA	Northern	Male	1	1.5	1		22.2	10.1		1	Dogs	Dogs	0.1027	1891
1540	1559	1994	12	144	NA	Unknown	NA	Northern	Male	1	2.5	2					NA	NA	Other	0.1027	1891
1541	1565	1994	12	144	NA	Rusk	NA	Northern	Female	0	4.5	4	3	19	8.6		NA	NA	Other	0.1027	1891
1542	1570	1994	12	144	NA	Price	NA	Northern	Male	1	NA	NA		28.1	12.7		1	Dogs	Dogs	0.1027	1891
1543	1585	1994	12	144	NA	Unknown	NA	Northern	Male	1	0.5	0		8.6	3.9		NA	NA	Other	0.1027	1891
1544	1632	1994	12	144	NA	Unknown	NA	Northern	Female	0	4.5	4	2	20.4	9.3		NA	NA	Other	0.1027	1891
1545	1641	1994	12	144	NA	Oneida	NA	Northern	Female	0	7.5	7	0	16.6	7.5		NA	NA	Other	0.1027	1891
1546	1527	1994	12	144	NA	Florence	NA	Northern	Male	1	2.5	2		29.6	13.4		1	Dogs	Dogs	0.1027	1891
1547	1550	1994	12	144	NA	Forest	NA	Northern	Male	1	5.5	5		22.2	10.1		1	Dogs	Dogs	0.1027	1891
1548	1560	1994	12	144	NA	Price	NA	Northern	Male	1	3.5	3		26.3	11.9		0	Trapped	Trapped	0.1027	1891
1549	1610	1994	12	144	NA	Unknown	NA	Northern	Male	1	3.5	3		25	11.3		NA	NA	Other	0.1027	1891
1550	1611	1994	12	144	NA	Florence	NA	Northern	Male	1	1.5	1		19.9	9		0	Trapped	Trapped	0.1027	1891
1551	1568	1994	12	144	NA	Taylor	NA	Northern	Male	1	3.5	3		32	14.5		NA	NA	Other	0.1027	1891
1552	1591	1994	12	144	NA	Unknown	NA	Northern	Male	1	1.5	1		23.5	10.7		NA	NA	Other	0.1027	1891
1553	1620	1994	12	144	NA	Unknown	NA	Northern	Male	1	0.5	0		10.2	4.6		NA	NA	Other	0.1027	1891
1554	1648	1994	12	144	NA	Langlade	NA	Northern	Female	0	6.5	6	0	17.8	8.1		NA	NA	Other	0.1027	1891
1555	1650	1994	12	144	NA	Unknown	NA	Northern	Male	1	4.5	4		30	13.6		NA	NA	Other	0.1027	1891
1556	1522	1994	12	144	NA	Washburn	NA	Northern	Female	0	5.5	5	0	17.9	8.1		1	Dogs	Dogs	0.1027	1891
1557	1526	1994	12	144	NA	Langlade	NA	Northern	Female	0	1.5	1	2	20.1	9.1		0	Trapped	Trapped	0.1027	1891
1558	1531	1994	12	144	NA	Unknown	NA	Northern	Female	0	2.5	2	0	14.9	6.8		NA	NA	Other	0.1027	1891
1559	1535	1994	12	144	NA	Bayfield	NA	Northern	Male	1	3.5	3		24.1	10.9		1	Dogs	Dogs	0.1027	1891
1560	1543	1994	12	144	NA	Taylor	NA	Northern	Male	1	3.5	3		28.2	12.8		NA	NA	Other	0.1027	1891
1561	1567	1994	12	144	NA	Oneida	NA	Northern	Female	0	3.5	3	4	17.3	7.8		1	Dogs	Dogs	0.1027	1891
1562	1594	1994	12	144	NA	Bayfield	NA	Northern	Female	0	6.5	6	3	19.6	8.9		NA	NA	Other	0.1027	1891
1563	1596	1994	12	144	NA	Florence	NA	Northern	Female	0	2.5	2	4	19	8.6		0	Trapped	Trapped	0.1027	1891
1564	1518	1994	12	144	NA	Burnett	NA	Northern	Female	0	2.5	2	3	18.6	8.4		1	Dogs	Dogs	0.1027	1891
1565	1538	1994	12	144	NA	Price	NA	Northern	Male	1	0.5	0		8.5	3.9		NA	NA	Other	0.1027	1891
1566	1540	1994	12	144	NA	Bayfield	NA	Northern	Female	0	0.5	0	0	9.5	4.3		1	Dogs	Dogs	0.1027	1891
1567	1579	1994	12	144	NA	Price	NA	Northern	Male	1	0.5	0		9.7	4.4		0	Trapped	Trapped	0.1027	1891
1568	1590	1994	12	144	NA	Unknown	NA	Northern	Male	1	3.5	3		32.5	14.7		NA	NA	Other	0.1027	1891
1569	1602	1994	12	144	NA	Oconto	NA	Northern	Female	0	0.5	0	0	10.6	4.8		0	Trapped	Trapped	0.1027	1891
1570	1631	1994	12	144	NA	Rusk	NA	Northern	Male	1	0.5	0		12.6	5.7		1	Dogs	Dogs	0.1027	1891
1571	1542	1994	12	144	NA	Sawyer	NA	Northern	Female	0	0.5	0	0	10.9	4.9		0	Trapped	Trapped	0.1027	1891
1572	1562	1994	12	144	NA	Unknown	NA	Northern	Male	1	0.5	0		15.9	7.2		NA	NA	Other	0.1027	1891
1573	1582	1994	12	144	NA	Ashland	NA	Northern	Male	1	1.5	1		22.7	10.3		1	Dogs	Dogs	0.1027	1891
1574	1661	1994	12	144	NA	Lincoln	NA	Northern	Female	0	2.5	2	3	21	9.5		1	Dogs	Dogs	0.1027	1891
1575	1511	1994	12	144	NA	Iron	NA	Northern	Female	0	13.5	13	2				1	Dogs	Dogs	0.1027	1891
1576	1513	1994	12	144	NA	Oneida	NA	Northern	Male	1	0.5	0		12.7	5.8		1	Dogs	Dogs	0.1027	1891
1577	1516	1994	12	144	NA	Price	NA	Northern	Female	0	1.5	1	0	17.8	8.1		0	Trapped	Trapped	0.1027	1891
1578	1517	1994	12	144	NA	Price	NA	Northern	Male	1	1.5	1		23.5	10.7		0	Trapped	Trapped	0.1027	1891
1579	1523	1994	12	144	NA	Douglas	NA	Northern	Male	1	1.5	1		25.5	11.6		1	Dogs	Dogs	0.1027	1891
1580	1528	1994	12	144	NA	Lincoln	NA	Northern	Male	1	7.5	7		34.9	15.8		1	Dogs	Dogs	0.1027	1891
1581	1536	1994	12	144	NA	Forest	NA	Northern	Male	1	0.5	0		16.8	7.6		1	Dogs	Dogs	0.1027	1891
1582	1537	1994	12	144	NA	Taylor	NA	Northern	Male	1	0.5	0		12	5.4		1	Dogs	Dogs	0.1027	1891
1583	1539	1994	12	144	NA	Forest	NA	Northern	Male	1	5.5	5		23.2	10.5		1	Dogs	Dogs	0.1027	1891
1584	1597	1994	12	144	NA	Lincoln	NA	Northern	Male	1	2.5	2		29	13.2		1	Dogs	Dogs	0.1027	1891
1585	1609	1994	12	144	NA	Oneida	NA	Northern	Male	1	7.5	7		29	13.2		1	Dogs	Dogs	0.1027	1891
1586	1654	1994	12	144	NA	Oneida	NA	Northern	Female	0	4.5	4	0	16.5	7.5		0	Trapped	Trapped	0.1027	1891
1587	1512	1994	12	144	NA	Marinette	NA	Northern	Male	1	1.5	1		19.2	8.7		1	Dogs	Dogs	0.1027	1891
1588	1519	1994	12	144	NA	Oneida	NA	Northern	Male	1	0.5	0		27.3	12.4		1	Dogs	Dogs	0.1027	1891
1589	1520	1994	12	144	NA	Oneida	NA	Northern	Male	1	1.5	1		26.1	11.8		NA	NA	Other	0.1027	1891
1590	1525	1994	12	144	NA	Marinette	NA	Northern	Male	1	1.5	1		23.4	10.6		1	Dogs	Dogs	0.1027	1891
1591	1529	1994	12	144	NA	Unknown	NA	Northern	Male	1	0.5	0		12.2	5.5		NA	NA	Other	0.1027	1891
1592	1551	1994	12	144	NA	Oconto	NA	Northern	Male	1	2.5	2		25.4	11.5		1	Dogs	Dogs	0.1027	1891
1593	1555	1994	12	144	NA	Lincoln	NA	Northern	Male	1	7.5	7		30.6	13.9		0	Trapped	Trapped	0.1027	1891
1594	1574	1994	12	144	NA	Taylor	NA	Northern	Female	0	2.5	2	2	14.8	6.7		0	Trapped	Trapped	0.1027	1891
1595	1575	1994	12	144	NA	Florence	NA	Northern	Female	0	5.5	5	3	28	12.7		1	Dogs	Dogs	0.1027	1891
1596	1595	1994	12	144	NA	Unknown	NA	Northern	Female	0	2.5	2	3	17.2	7.8		NA	NA	Other	0.1027	1891
1597	1600	1994	12	144	NA	Unknown	NA	Northern	Male	1	1.5	1		20.8	9.4		NA	NA	Other	0.1027	1891
1598	1603	1994	12	144	NA	Taylor	NA	Northern	Female	0	1.5	1	0	21.4	9.7		1	Dogs	Dogs	0.1027	1891
1599	1607	1994	12	144	NA	Taylor	NA	Northern	Male	1	2.5	2		26.7	12.1		1	Dogs	Dogs	0.1027	1891
1600	1608	1994	12	144	NA	Forest	NA	Northern	Male	1	2.5	2		25.2	11.4		0	Trapped	Trapped	0.1027	1891
1601	1612	1994	12	144	NA	Iron	NA	Northern	Male	1	3.5	3		28	12.7		0	Trapped	Trapped	0.1027	1891
1602	1613	1994	12	144	NA	Price	NA	Northern	Male	1	2.5	2		34.4	15.6		1	Dogs	Dogs	0.1027	1891
1603	1615	1994	12	144	NA	Forest	NA	Northern	Male	1	8.5	8		34.9	15.8		1	Dogs	Dogs	0.1027	1891
1604	1616	1994	12	144	NA	Forest	NA	Northern	Male	1	4.5	4		27.6	12.5		1	Dogs	Dogs	0.1027	1891
1605	1617	1994	12	144	NA	Burnett	NA	Northern	Female	0	0.5	0	0	12	5.4		0	Trapped	Trapped	0.1027	1891
1606	1637	1994	12	144	NA	Price	NA	Northern	Male	1	1.5	1		21.5	9.8		1	Dogs	Dogs	0.1027	1891
1607	1642	1994	12	144	NA	Florence	NA	Northern	Male	1	1.5	1		20.2	9.2		0	Trapped	Trapped	0.1027	1891
1608	1658	1994	12	144	NA	Sawyer	NA	Northern	Male	1	9.5	9		27.4	12.4		1	Dogs	Dogs	0.1027	1891
1609	1572	1994	12	144	NA	Unknown	NA	Northern	Male	1	0.5	0					NA	NA	Other	0.1027	1891
1610	1573	1994	12	144	NA	Forest	NA	Northern	Male	1	1.5	1		25.4	11.5		1	Dogs	Dogs	0.1027	1891
1611	1578	1994	12	144	NA	Florence	NA	Northern	Female	0	1.5	1	0	16.4	7.4		0	Trapped	Trapped	0.1027	1891
1612	1593	1994	12	144	NA	Iron	NA	Northern	Female	0	0.5	0	0	8	3.6		1	Dogs	Dogs	0.1027	1891
1613	1604	1994	12	144	NA	Unknown	NA	Northern	Male	1	1.5	1		35.6	16.1		NA	NA	Other	0.1027	1891
1614	1636	1994	12	144	NA	Oconto	NA	Northern	Male	1	5.5	5		32.4	14.7		1	Dogs	Dogs	0.1027	1891
1615	1662	1994	12	144	NA	Washburn	NA	Northern	Female	0	2.5	2	4	17.7	8		NA	NA	Other	0.1027	1891
1616	1521	1994	12	144	NA	Sawyer	NA	Northern	Male	1	4.5	4		24	10.9		1	Dogs	Dogs	0.1027	1891
1617	1557	1994	12	144	NA	Forest	NA	Northern	Female	0	0.5	0	0	11.7	5.3		1	Dogs	Dogs	0.1027	1891
1618	1564	1994	12	144	NA	Unknown	NA	Northern	Male	1	0.5	0		8.6	3.9		NA	NA	Other	0.1027	1891
1619	1571	1994	12	144	NA	Lincoln	NA	Northern	Male	1	1.5	1		19	8.6		0	Trapped	Trapped	0.1027	1891
1620	1614	1994	12	144	NA	Langlade	NA	Northern	Female	0	0.5	0	0	7.8	3.5		NA	NA	Other	0.1027	1891
1621	1663	1994	12	144	NA	Taylor	NA	Northern	Male	1	1.5	1		21.1	9.6		1	Dogs	Dogs	0.1027	1891
1622	1533	1994	12	144	NA	Oneida	NA	Northern	Male	1	1.5	1		18.6	8.4		0	Trapped	Trapped	0.1027	1891
1623	1544	1994	12	144	NA	Forest	NA	Northern	Female	0	NA	NA	0	12.4	5.6		0	Trapped	Trapped	0.1027	1891
1624	1548	1994	12	144	NA	Sawyer	NA	Northern	Female	0	3.5	3	2	14.1	6.4		0	Trapped	Trapped	0.1027	1891
1625	1549	1994	12	144	NA	Rusk	NA	Northern	Male	1	0.5	0		10.9	4.9		0	Trapped	Trapped	0.1027	1891
1626	1569	1994	12	144	NA	Rusk	NA	Northern	Female	0	4.5	4	2	17.4	7.9		1	Dogs	Dogs	0.1027	1891
1627	1581	1994	12	144	NA	Price	NA	Northern	Male	1	3.5	3		23	10.4		NA	NA	Other	0.1027	1891
1628	1583	1994	12	144	NA	Price	NA	Northern	Female	0	6.5	6	2	19.3	8.8		1	Dogs	Dogs	0.1027	1891
1629	1605	1994	12	144	NA	Unknown	NA	Northern	Female	0	1.5	1	2	15.7	7.1		NA	NA	Other	0.1027	1891
1630	1645	1994	12	144	NA	Unknown	NA	Northern	Male	1	2.5	2		18.9	8.6		1	Dogs	Dogs	0.1027	1891
1631	1653	1994	12	144	NA	Rusk	NA	Northern	Female	0	2.5	2	3	15.6	7.1		1	Dogs	Dogs	0.1027	1891
1632	1587	1994	12	144	NA	Marinette	NA	Northern	Male	1	1.5	1		27.7	12.6		NA	NA	Other	0.1027	1891
1633	1524	1994	12	144	NA	Oneida	NA	Northern	Male	1	3.5	3		23.7	10.8		1	Dogs	Dogs	0.1027	1891
1634	1563	1994	12	144	NA	Unknown	NA	Northern	Male	1	1.5	1		28.6	13		NA	NA	Other	0.1027	1891
1635	1541	1994	12	144	NA	Taylor	NA	Northern	Male	1	1.5	1		34	15.4		1	Dogs	Dogs	0.1027	1891
1636	1546	1994	12	144	NA	Oconto	NA	Northern	Female	0	5.5	5	2	17	7.7		1	Dogs	Dogs	0.1027	1891
1637	1547	1994	12	144	NA	Taylor	NA	Northern	Male	1	5.5	5		22.2	10.1		1	Dogs	Dogs	0.1027	1891
1638	1558	1994	12	144	NA	Unknown	NA	Northern	Male	1	7.5	7		33	15		NA	NA	Other	0.1027	1891
1639	1561	1994	12	144	NA	Forest	NA	Northern	Female	0	1.5	1	2	18.6	8.4		NA	NA	Other	0.1027	1891
1640	1566	1994	12	144	NA	Florence	NA	Northern	Female	0	0.5	0	0	12.5	5.7		1	Dogs	Dogs	0.1027	1891
1641	1576	1994	12	144	NA	Vilas	NA	Northern	Female	0	6.5	6	0	18.8	8.5		NA	NA	Other	0.1027	1891
1642	1577	1994	12	144	NA	Florence	NA	Northern	Male	1	4.5	4		32.2	14.6		NA	NA	Other	0.1027	1891
1643	1580	1994	12	144	NA	Ashland	NA	Northern	Male	1	0.5	0		10.1	4.6		0	Trapped	Trapped	0.1027	1891
1644	1584	1994	12	144	NA	Marinette	NA	Northern	Female	0	2.5	2	4	14.3	6.5		0	Trapped	Trapped	0.1027	1891
1645	1598	1994	12	144	NA	Marinette	NA	Northern	Male	1	1.5	1		23.9	10.8		0	Trapped	Trapped	0.1027	1891
1646	1599	1994	12	144	NA	Langlade	NA	Northern	Male	1	2.5	2		22.4	10.2		0	Trapped	Trapped	0.1027	1891
1647	1601	1994	12	144	NA	Florence	NA	Northern	Female	0	0.5	0	0	9.9	4.5		1	Dogs	Dogs	0.1027	1891
1648	1606	1994	12	144	NA	Rusk	NA	Northern	Female	0	0.5	0	0	9.4	4.3		0	Trapped	Trapped	0.1027	1891
1649	1618	1994	12	144	NA	Lincoln	NA	Northern	Male	1	2.5	2		23.5	10.7		1	Dogs	Dogs	0.1027	1891
1650	1619	1994	12	144	NA	Price	NA	Northern	Male	1	0.5	0		12	5.4		1	Dogs	Dogs	0.1027	1891
1651	1621	1994	12	144	NA	Lincoln	NA	Northern	Male	1	2.5	2		28.6	13		NA	NA	Other	0.1027	1891
1652	1622	1994	12	144	NA	Oneida	NA	Northern	Female	0	1.5	1	0	14	6.4		1	Dogs	Dogs	0.1027	1891
1653	1628	1994	12	144	NA	Unknown	NA	Northern	Female	0	0.5	0	0	9.2	4.2		NA	NA	Other	0.1027	1891
1654	1629	1994	12	144	NA	Unknown	NA	Northern	Male	1	6.5	6		29.4	13.3		NA	NA	Other	0.1027	1891
1655	1630	1994	12	144	NA	Price	NA	Northern	Male	1	0.5	0		10	4.5		1	Dogs	Dogs	0.1027	1891
1656	1635	1994	12	144	NA	Price	NA	Northern	Male	1	9.5	9		29.3	13.3		0	Trapped	Trapped	0.1027	1891
1657	1638	1994	12	144	NA	Unknown	NA	Northern	Male	1	0.5	0		12.5	5.7		NA	NA	Other	0.1027	1891
1658	1639	1994	12	144	NA	Marinette	NA	Northern	Female	0	2.5	2	3				0	Trapped	Trapped	0.1027	1891
1659	1643	1994	12	144	NA	Price	NA	Northern	Female	0	6.5	6		16	7.3		1	Dogs	Dogs	0.1027	1891
1660	1646	1994	12	144	NA	Rusk	NA	Northern	Male	1	1.5	1		27	12.2		1	Dogs	Dogs	0.1027	1891
1661	1647	1994	12	144	NA	Taylor	NA	Northern	Male	1	1.5	1		23	10.4		1	Dogs	Dogs	0.1027	1891
1662	1649	1994	12	144	NA	Unknown	NA	Northern	Male	1	4.5	4		28.3	12.8		NA	NA	Other	0.1027	1891
1663	1651	1994	12	144	NA	Price	NA	Northern	Male	1	1.5	1		26.5	12		1	Dogs	Dogs	0.1027	1891
1664	1660	1994	12	144	NA	Price	NA	Northern	Male	1	1.5	1		13.6	6.2		0	Trapped	Trapped	0.1027	1891
1665	1664	1994	12	144	NA	Oneida	NA	Northern	Male	1	2.5	2		25.7	11.7		1	Dogs	Dogs	0.1027	1891
1666	1674	1995	13	169	NA	Lincoln	NA	Northern	Male	1	3.5	3		33.1	15		NA	NA	Other	0.066	1999
1667	1734	1995	13	169	NA	Unknown	NA	Northern	Male	1	5.5	5		30.9	14		NA	NA	Other	0.066	1999
1668	1738	1995	13	169	NA	Price	NA	Northern	Male	1	0.5	0		11.2	5.1		1	Dogs	Dogs	0.066	1999
1669	1740	1995	13	169	NA	Sawyer	NA	Northern	Male	1	2.5	2		28.6	13		1	Dogs	Dogs	0.066	1999
1670	1692	1995	13	169	NA	Unknown	NA	Northern	Male	1	3.5	3		25.7	11.7		NA	NA	Other	0.066	1999
1671	1728	1995	13	169	NA	Sawyer	NA	Northern	Male	1	5.5	5		30.4	13.8		1	Dogs	Dogs	0.066	1999
1672	1687	1995	13	169	NA	Lincoln	NA	Northern	Male	1	2.5	2		28.4	12.9		NA	NA	Other	0.066	1999
1673	1690	1995	13	169	NA	Oconto	NA	Northern	Male	1	0.5	0		9.8	4.4		NA	NA	Other	0.066	1999
1674	1696	1995	13	169	NA	Unknown	NA	Northern	Male	1	0.5	0		10.7	4.9		NA	NA	Other	0.066	1999
1675	1698	1995	13	169	NA	Marinette	NA	Northern	Female	0	1.5	1	0	12.4	5.6		NA	NA	Other	0.066	1999
1676	1716	1995	13	169	NA	Unknown	NA	Northern	Female	0	0.5	0	0	9.2	4.2		NA	NA	Other	0.066	1999
1677	1723	1995	13	169	NA	Unknown	NA	Northern	Male	1	3.5	3		29.2	13.2		NA	NA	Other	0.066	1999
1678	1732	1995	13	169	NA	Taylor	NA	Northern	Female	0	1.5	1	2	16.8	7.6		NA	NA	Other	0.066	1999
1679	1695	1995	13	169	NA	Marinette	NA	Northern	Male	1	0.5	0		11.1	5		0	Trapped	Trapped	0.066	1999
1680	1713	1995	13	169	NA	Forest	NA	Northern	Female	0	1.5	1	2	14.5	6.6		0	Trapped	Trapped	0.066	1999
1681	1714	1995	13	169	NA	Lincoln	NA	Northern	Male	1	3.5	3		26.6	12.1		1	Dogs	Dogs	0.066	1999
1682	1721	1995	13	169	NA	Taylor	NA	Northern	Female	0	5.5	5	3	22	10		1	Dogs	Dogs	0.066	1999
1683	1729	1995	13	169	NA	Forest	NA	Northern	Male	1	4.5	4		25.6	11.6		1	Dogs	Dogs	0.066	1999
1684	1730	1995	13	169	NA	Lincoln	NA	Northern	Female	0	6.5	6	3	15.3	6.9		0	Trapped	Trapped	0.066	1999
1685	1731	1995	13	169	NA	Florence	NA	Northern	Male	1	0.5	0		12.6	5.7		1	Dogs	Dogs	0.066	1999
1686	1666	1995	13	169	NA	Sawyer	NA	Northern	Female	0	1.5	1	3	11.3	5.1		0	Trapped	Trapped	0.066	1999
1687	1671	1995	13	169	NA	Oconto	NA	Northern	Female	0	0.5	0	0	7.3	3.3		0	Trapped	Trapped	0.066	1999
1688	1680	1995	13	169	NA	Unknown	NA	Northern	Female	0	6.5	6	0	11.8	5.4		NA	NA	Other	0.066	1999
1689	1688	1995	13	169	NA	Langlade	NA	Northern	Female	0	10.5	10	2	16.6	7.5		0	Trapped	Trapped	0.066	1999
1690	1691	1995	13	169	NA	Forest	NA	Northern	Male	1	6.5	6		27.7	12.6		0	Trapped	Trapped	0.066	1999
1691	1700	1995	13	169	NA	Price	NA	Northern	Male	1	1.5	1		15.1	6.8		0	Trapped	Trapped	0.066	1999
1692	1706	1995	13	169	NA	Forest	NA	Northern	Male	1	1.5	1		24	10.9		1	Dogs	Dogs	0.066	1999
1693	1735	1995	13	169	NA	Marinette	NA	Northern	Male	1	8.5	8		30.8	14		0	Trapped	Trapped	0.066	1999
1694	1683	1995	13	169	NA	Lincoln	NA	Northern	Female	0	2.5	2	0	17.8	8.1		1	Dogs	Dogs	0.066	1999
1695	1686	1995	13	169	NA	Oconto	NA	Northern	Male	1	5.5	5		32.4	14.7		1	Dogs	Dogs	0.066	1999
1696	1699	1995	13	169	NA	Oneida	NA	Northern	Male	1	1.5	1		18.8	8.5		1	Dogs	Dogs	0.066	1999
1697	1724	1995	13	169	NA	Unknown	NA	Northern	Male	1	1.5	1		19.7	8.9		NA	NA	Other	0.066	1999
1698	1725	1995	13	169	NA	Oconto	NA	Northern	Male	1	3.5	3		25.5	11.6		NA	NA	Other	0.066	1999
1699	1741	1995	13	169	NA	Price	NA	Northern	Male	1	3.5	3		29.7	13.5		0	Trapped	Trapped	0.066	1999
1700	1681	1995	13	169	NA	Unknown	NA	Northern	Male	1	0.5	0		12.6	5.7		NA	NA	Other	0.066	1999
1701	1694	1995	13	169	NA	Lincoln	NA	Northern	Male	1	5.5	5		31.3	14.2		1	Dogs	Dogs	0.066	1999
1702	1701	1995	13	169	NA	Taylor	NA	Northern	Female	0	1.5	1	2	15.6	7.1		1	Dogs	Dogs	0.066	1999
1703	1704	1995	13	169	NA	Vilas	NA	Northern	Male	1	2.5	2		30.5	13.8		1	Dogs	Dogs	0.066	1999
1704	1709	1995	13	169	NA	Oconto	NA	Northern	Female	0	6.5	6	2	16.3	7.4		0	Trapped	Trapped	0.066	1999
1705	1710	1995	13	169	NA	Oconto	NA	Northern	Male	1	8.5	8		30.7	13.9		1	Dogs	Dogs	0.066	1999
1706	1712	1995	13	169	NA	Taylor	NA	Northern	Male	1	3.5	3		21.3	9.7		1	Dogs	Dogs	0.066	1999
1707	1717	1995	13	169	NA	Oconto	NA	Northern	Female	0	5.5	5	3	19.7	8.9		0	Trapped	Trapped	0.066	1999
1708	1726	1995	13	169	NA	Langlade	NA	Northern	Male	1	0.5	0		14	6.4		0	Trapped	Trapped	0.066	1999
1709	1702	1995	13	169	NA	Langlade	NA	Northern	Female	0	3.5	3	2	18.2	8.3		0	Trapped	Trapped	0.066	1999
1710	1719	1995	13	169	NA	Sawyer	NA	Northern	Female	0	5.5	5	3	19	8.6		1	Dogs	Dogs	0.066	1999
1711	1727	1995	13	169	NA	Unknown	NA	Northern	Male	1	2.5	2		23.1	10.5		NA	NA	Other	0.066	1999
1712	1669	1995	13	169	NA	Forest	NA	Northern	Female	0	5.5	5	2	24.2	11		1	Dogs	Dogs	0.066	1999
1713	1673	1995	13	169	NA	Oconto	NA	Northern	Male	1	7.5	7		32	14.5		1	Dogs	Dogs	0.066	1999
1714	1676	1995	13	169	NA	Price	NA	Northern	Male	1	0.5	0		14.3	6.5		1	Dogs	Dogs	0.066	1999
1715	1697	1995	13	169	NA	Oneida	NA	Northern	Female	0	2.5	2	2	16.8	7.6		NA	NA	Other	0.066	1999
1716	1718	1995	13	169	NA	Price	NA	Northern	Male	1	6.5	6		26.3	11.9		1	Dogs	Dogs	0.066	1999
1717	1720	1995	13	169	NA	Langlade	NA	Northern	Male	1	0.5	0		12.2	5.5		0	Trapped	Trapped	0.066	1999
1718	1744	1995	13	169	NA	Unknown	NA	Northern	Male	1	0.5	0		15.4	7		NA	NA	Other	0.066	1999
1719	1736	1995	13	169	NA	Forest	NA	Northern	Female	0	1.5	1	0	17.5	7.9		1	Dogs	Dogs	0.066	1999
1720	1670	1995	13	169	NA	Marinette	NA	Northern	Female	0	2.5	2	3	17.6	8		1	Dogs	Dogs	0.066	1999
1721	1677	1995	13	169	NA	Lincoln	NA	Northern	Male	1	4.5	4		27.4	12.4		0	Trapped	Trapped	0.066	1999
1722	1679	1995	13	169	NA	Marinette	NA	Northern	Male	1	NA	NA		20.7	9.4		1	Dogs	Dogs	0.066	1999
1723	1693	1995	13	169	NA	Oconto	NA	Northern	Male	1	0.5	0		14.3	6.5		1	Dogs	Dogs	0.066	1999
1724	1739	1995	13	169	NA	Oneida	NA	Northern	Male	1	4.5	4		24.3	11		NA	NA	Other	0.066	1999
1725	1743	1995	13	169	NA	Florence	NA	Northern	Male	1	2.5	2		28.8	13.1		NA	NA	Other	0.066	1999
1726	1685	1995	13	169	NA	Langlade	NA	Northern	Female	0	0.5	0	0	6.5	2.9		1	Dogs	Dogs	0.066	1999
1727	1689	1995	13	169	NA	Langlade	NA	Northern	Female	0	0.5	0	0	9.5	4.3		1	Dogs	Dogs	0.066	1999
1728	1707	1995	13	169	NA	Langlade	NA	Northern	Male	1	1.5	1		19.9	9		0	Trapped	Trapped	0.066	1999
1729	1711	1995	13	169	NA	Iron	NA	Northern	Female	0	0.5	0	0	12	5.4		0	Trapped	Trapped	0.066	1999
1730	1708	1995	13	169	NA	Unknown	NA	Northern	Female	0	9.5	9	0	16	7.3		0	Trapped	Trapped	0.066	1999
1731	1742	1995	13	169	NA	Bayfield	NA	Northern	Male	1	NA	NA					0	Trapped	Trapped	0.066	1999
1732	1667	1995	13	169	NA	Unknown	NA	Northern	Male	1	2.5	2		25	11.3		NA	NA	Other	0.066	1999
1733	1668	1995	13	169	NA	Lincoln	NA	Northern	Female	0	1.5	1	0	14	6.4		1	Dogs	Dogs	0.066	1999
1734	1672	1995	13	169	NA	Rusk	NA	Northern	Female	0	0.5	0	0	9	4.1		1	Dogs	Dogs	0.066	1999
1735	1675	1995	13	169	NA	Unknown	NA	Northern	Female	0	3.5	3	0	19.8	9		0	Trapped	Trapped	0.066	1999
1736	1678	1995	13	169	NA	Douglas	NA	Northern	Female	0	1.5	1	2	16.2	7.3		0	Trapped	Trapped	0.066	1999
1737	1682	1995	13	169	NA	Sawyer	NA	Northern	Male	1	6.5	6		21.6	9.8		1	Dogs	Dogs	0.066	1999
1738	1684	1995	13	169	NA	Douglas	NA	Northern	Female	0	3.5	3	5	18	8.2		NA	NA	Other	0.066	1999
1739	1703	1995	13	169	NA	Marinette	NA	Northern	Female	0	0.5	0	0	9.8	4.4		0	Trapped	Trapped	0.066	1999
1740	1705	1995	13	169	NA	Washburn	NA	Northern	Male	1	4.5	4					1	Dogs	Dogs	0.066	1999
1741	1715	1995	13	169	NA	Sawyer	NA	Northern	Female	0	NA	NA		18.2	8.3		NA	NA	Other	0.066	1999
1742	1722	1995	13	169	NA	Price	NA	Northern	Female	0	2.5	2	0				NA	NA	Other	0.066	1999
1743	1733	1995	13	169	NA	Price	NA	Northern	Male	1	1.5	1		27.3	12.4		1	Dogs	Dogs	0.066	1999
1744	1737	1995	13	169	NA	Unknown	NA	Northern	Male	1	1.5	1					NA	NA	Other	0.066	1999
1745	1745	1995	13	169	NA	Barron	NA	Northern	Male	1	4.5	4		25.3	11.5		NA	NA	Other	0.066	1999
1746	1788	1996	14	196	NA	Oneida	NA	Northern	Female	0	2.5	2	0	16.4	7.4		0	Trapped	Trapped	0.06	2454
1747	1792	1996	14	196	NA	Taylor	NA	Northern	Male	1	3.5	3					1	Dogs	Dogs	0.06	2454
1748	1798	1996	14	196	NA	Oneida	NA	Northern	Female	0	3.5	3	4	20	9.1		0	Trapped	Trapped	0.06	2454
1749	1757	1996	14	196	NA	Langlade	NA	Northern	Male	1	0.5	0		26	11.8		1	Dogs	Dogs	0.06	2454
1750	1773	1996	14	196	NA	Unknown	NA	Northern	Male	1	2.5	2					NA	NA	Other	0.06	2454
1751	1800	1996	14	196	NA	Langlade	NA	Northern	Female	0	1.5	1	3	21.5	9.8		0	Trapped	Trapped	0.06	2454
1752	1837	1996	14	196	NA	Forest	NA	Northern	Male	1	4.5	4					1	Dogs	Dogs	0.06	2454
1753	1803	1996	14	196	NA	Unknown	NA	Northern	Male	1	0.5	0					NA	NA	NA	0.06	2454
1754	1805	1996	14	196	NA	Sawyer	NA	Northern	Female	0	0.5	0	0	9.4	4.3		1	Dogs	Dogs	0.06	2454
1755	1825	1996	14	196	NA	Unknown	NA	Northern	Female	0	2.5	2	1				NA	NA	Other	0.06	2454
1756	1828	1996	14	196	NA	Unknown	NA	Northern	Male	1	4.5	4					NA	NA	Other	0.06	2454
1757	1832	1996	14	196	NA	Oneida	NA	Northern	Female	0	1.5	1	4				NA	NA	NA	0.06	2454
1758	1834	1996	14	196	NA	Chippewa	NA	Northern	Male	1	0.5	0					NA	NA	Other	0.06	2454
1759	1835	1996	14	196	NA	Oneida	NA	Northern	Male	1	5.5	5					1	Dogs	Dogs	0.06	2454
1760	1836	1996	14	196	NA	Unknown	NA	Northern	Male	1	1.5	1					NA	NA	Other	0.06	2454
1761	1850	1996	14	196	NA	Oneida	NA	Northern	Male	1	2.5	2		32	14.5		0	Trapped	Trapped	0.06	2454
1762	1789	1996	14	196	NA	Oconto	NA	Northern	Male	1	2.5	2					1	Dogs	Dogs	0.06	2454
1763	1819	1996	14	196	NA	Unknown	NA	Northern	Male	1	2.5	2					NA	NA	NA	0.06	2454
1764	1846	1996	14	196	NA	Unknown	NA	Northern	Male	1	1.5	1					NA	NA	Other	0.06	2454
1765	1820	1996	14	196	NA	Unknown	NA	Northern	Male	1	0.5	0					NA	NA	Other	0.06	2454
1766	1822	1996	14	196	NA	Taylor	NA	Northern	Female	0	3.5	3	2	21	9.5		1	Dogs	Dogs	0.06	2454
1767	1823	1996	14	196	NA	Unknown	NA	Northern	Male	1	1.5	1					NA	NA	Other	0.06	2454
1768	1827	1996	14	196	NA	Unknown	NA	Northern	Female	0	4.5	4	2	16.9	7.7		NA	NA	Other	0.06	2454
1769	1829	1996	14	196	NA	Oconto	NA	Northern	Female	0	8.5	8		22.5	10.2		NA	NA	Other	0.06	2454
1770	1831	1996	14	196	NA	Taylor	NA	Northern	Female	0	3.5	3	2	18	8.2		NA	NA	Other	0.06	2454
1771	1833	1996	14	196	NA	Lincoln	NA	Northern	Male	1	0.5	0					0	Trapped	Trapped	0.06	2454
1772	1848	1996	14	196	NA	Taylor	NA	Northern	Male	1	0.5	0					NA	NA	Other	0.06	2454
1773	1851	1996	14	196	NA	Oconto	NA	Northern	Male	1	1.5	1					1	Dogs	Dogs	0.06	2454
1774	1751	1996	14	196	NA	Taylor	NA	Northern	Female	0	6.5	6	3	20	9.1		NA	NA	Other	0.06	2454
1775	1753	1996	14	196	NA	Chippewa	NA	Northern	Male	1	0.5	0					1	Dogs	Dogs	0.06	2454
1776	1769	1996	14	196	NA	Taylor	NA	Northern	Female	0	3.5	3	4	15.8	7.2		NA	NA	Other	0.06	2454
1777	1778	1996	14	196	NA	Taylor	NA	Northern	Male	1	3.5	3					NA	NA	Other	0.06	2454
1778	1787	1996	14	196	NA	Unknown	NA	Northern	Female	0	4.5	4	4	16.4	7.4		NA	NA	Other	0.06	2454
1779	1809	1996	14	196	NA	Rusk	NA	Northern	Male	1	1.5	1					NA	NA	Other	0.06	2454
1780	1811	1996	14	196	NA	Lincoln	NA	Northern	Female	0	0.5	0	0	11.9	5.4		1	Dogs	Dogs	0.06	2454
1781	1814	1996	14	196	NA	Marinette	NA	Northern	Male	1	0.5	0					NA	NA	NA	0.06	2454
1782	1817	1996	14	196	NA	Taylor	NA	Northern	Male	1	2.5	2					1	Dogs	Dogs	0.06	2454
1783	1821	1996	14	196	NA	Unknown	NA	Northern	Female	0	4.5	4	4	20.3	9.2		NA	NA	Other	0.06	2454
1784	1838	1996	14	196	NA	Price	NA	Northern	Female	0	6.5	6	4	21	9.5		NA	NA	Other	0.06	2454
1785	1841	1996	14	196	NA	Unknown	NA	Northern	Male	1	1.5	1					NA	NA	Other	0.06	2454
1786	1777	1996	14	196	NA	Unknown	NA	Northern	Male	1	0.5	0					NA	NA	Other	0.06	2454
1787	1813	1996	14	196	NA	Sawyer	NA	Northern	Male	1	2.5	2					1	Dogs	Dogs	0.06	2454
1788	1816	1996	14	196	NA	Rusk	NA	Northern	Female	0	2.5	2	1	16.4	7.4		1	Dogs	Dogs	0.06	2454
1789	1761	1996	14	196	NA	Oneida	NA	Northern	Male	1	1.5	1					1	Dogs	Dogs	0.06	2454
1790	1767	1996	14	196	NA	Unknown	NA	Northern	Female	0	1.5	1	0	15.6	7.1		NA	NA	Other	0.06	2454
1791	1771	1996	14	196	NA	Lincoln	NA	Northern	Male	1	0.5	0					NA	NA	Other	0.06	2454
1792	1824	1996	14	196	NA	Burnett	NA	Northern	Male	1	0.5	0					0	Trapped	Trapped	0.06	2454
1793	1826	1996	14	196	NA	Iron	NA	Northern	Female	0	0.5	0	0	8.7	3.9		0	Trapped	Trapped	0.06	2454
1794	1746	1996	14	196	NA	Unknown	NA	Northern	Female	0	4.5	4	1	16.5	7.5		NA	NA	Other	0.06	2454
1795	1749	1996	14	196	NA	Taylor	NA	Northern	Male	1	1.5	1					1	Dogs	Dogs	0.06	2454
1796	1758	1996	14	196	NA	Burnett	NA	Northern	Male	1	3.5	3					1	Dogs	Dogs	0.06	2454
1797	1760	1996	14	196	NA	Taylor	NA	Northern	Female	0	0.5	0	0				NA	NA	Other	0.06	2454
1798	1794	1996	14	196	NA	Oneida	NA	Northern	Male	1	3.5	3					1	Dogs	Dogs	0.06	2454
1799	1799	1996	14	196	NA	Unknown	NA	Northern	Female	0	0.5	0	0	6.9	3.1		1	Dogs	Dogs	0.06	2454
1800	1801	1996	14	196	NA	Unknown	NA	Northern	Male	1	1.5	1					NA	NA	Other	0.06	2454
1801	1806	1996	14	196	NA	Rusk	NA	Northern	Male	1	0.5	0					NA	NA	Other	0.06	2454
1802	1840	1996	14	196	NA	Unknown	NA	Northern	Female	0	7.5	7	4	20.5	9.3		NA	NA	Other	0.06	2454
1803	1847	1996	14	196	NA	Burnett	NA	Northern	Male	1	5.5	5					1	Dogs	Dogs	0.06	2454
1804	1855	1996	14	196	NA	Oneida	NA	Northern	Male	1	2.5	2					1	Dogs	Dogs	0.06	2454
1805	1781	1996	14	196	NA	Forest	NA	Northern	Male	1	4.5	4					0	Trapped	Trapped	0.06	2454
1806	1802	1996	14	196	NA	Oneida	NA	Northern	Male	1	2.5	2					1	Dogs	Dogs	0.06	2454
1807	1815	1996	14	196	NA	Price	NA	Northern	Male	1	8.5	8					1	Dogs	Dogs	0.06	2454
1808	1839	1996	14	196	NA	Forest	NA	Northern	Female	0	6.5	6	3				NA	NA	Other	0.06	2454
1809	1842	1996	14	196	NA	Unknown	NA	Northern	Female	0	1.5	1	1	16.2	7.3		NA	NA	Other	0.06	2454
1810	1843	1996	14	196	NA	Forest	NA	Northern	Male	1	1.5	1					NA	NA	Other	0.06	2454
1811	1844	1996	14	196	NA	Lincoln	NA	Northern	Male	1	1.5	1					1	Dogs	Dogs	0.06	2454
1812	1845	1996	14	196	NA	Oneida	NA	Northern	Male	1	1.5	1					0	Trapped	Trapped	0.06	2454
1813	1776	1996	14	196	NA	Unknown	NA	Northern	Male	1	6.5	6					NA	NA	Other	0.06	2454
1814	1785	1996	14	196	NA	Unknown	NA	Northern	Male	1	4.5	4					NA	NA	Other	0.06	2454
1815	1796	1996	14	196	NA	Lincoln	NA	Northern	Female	0	10.5	10	2				1	Dogs	Dogs	0.06	2454
1816	1784	1996	14	196	NA	Unknown	NA	Northern	Female	0	2.5	2	4	15	6.8		NA	NA	Other	0.06	2454
1817	1853	1996	14	196	NA	Lincoln	NA	Northern	Male	1	0.5	0					NA	NA	Other	0.06	2454
1818	1747	1996	14	196	NA	Unknown	NA	Northern	Female	0	0.5	0	0	11.8	5.4		NA	NA	Other	0.06	2454
1819	1748	1996	14	196	NA	Marinette	NA	Northern	Female	0	4.5	4					NA	NA	Other	0.06	2454
1820	1754	1996	14	196	NA	Lincoln	NA	Northern	Male	1	0.5	0					0	Trapped	Trapped	0.06	2454
1821	1755	1996	14	196	NA	Price	NA	Northern	Female	0	6.5	6	2	19.6	8.9		1	Dogs	Dogs	0.06	2454
1822	1768	1996	14	196	NA	Unknown	NA	Northern	Male	1	1.5	1					NA	NA	Other	0.06	2454
1823	1770	1996	14	196	NA	Marinette	NA	Northern	Female	0	1.5	1	3				1	Dogs	Dogs	0.06	2454
1824	1772	1996	14	196	NA	Lincoln	NA	Northern	Female	0	8.5	8	3	16.7	7.6		1	Dogs	Dogs	0.06	2454
1825	1774	1996	14	196	NA	Unknown	NA	Northern	Male	1	0.5	0					NA	NA	NA	0.06	2454
1826	1779	1996	14	196	NA	Iron	NA	Northern	Male	1	4.5	4					0	Trapped	Trapped	0.06	2454
1827	1791	1996	14	196	NA	Langlade	NA	Northern	Female	0	1.5	1	3	16.7	7.6		1	Dogs	Dogs	0.06	2454
1828	1793	1996	14	196	NA	Lincoln	NA	Northern	Male	1	1.5	1					1	Dogs	Dogs	0.06	2454
1829	1750	1996	14	196	NA	Langlade	NA	Northern	Male	1	2.5	2					1	Dogs	Dogs	0.06	2454
1830	1752	1996	14	196	NA	Langlade	NA	Northern	Male	1	2.5	2					NA	NA	Other	0.06	2454
1831	1756	1996	14	196	NA	Oconto	NA	Northern	Female	0	1.5	1	0	19.1	8.7		0	Trapped	Trapped	0.06	2454
1832	1759	1996	14	196	NA	Forest	NA	Northern	Male	1	0.5	0					1	Dogs	Dogs	0.06	2454
1833	1762	1996	14	196	NA	Lincoln	NA	Northern	Male	1	2.5	2					NA	NA	Other	0.06	2454
1834	1763	1996	14	196	NA	Oconto	NA	Northern	Male	1	0.5	0					0	Trapped	Trapped	0.06	2454
1835	1764	1996	14	196	NA	Langlade	NA	Northern	Female	0	0.5	0	0				0	Trapped	Trapped	0.06	2454
1836	1765	1996	14	196	NA	Forest	NA	Northern	Female	0	8.5	8	1	21.5	9.8		1	Dogs	Dogs	0.06	2454
1837	1766	1996	14	196	NA	Langlade	NA	Northern	Male	1	1.5	1					0	Trapped	Trapped	0.06	2454
1838	1775	1996	14	196	NA	Langlade	NA	Northern	Male	1	2.5	2					1	Dogs	Dogs	0.06	2454
1839	1780	1996	14	196	NA	Unknown	NA	Northern	Female	0	3.5	3	3				NA	NA	NA	0.06	2454
1840	1782	1996	14	196	NA	Forest	NA	Northern	Female	0	0.5	0	0	8.5	3.9		0	Trapped	Trapped	0.06	2454
1841	1783	1996	14	196	NA	Langlade	NA	Northern	Female	0	0.5	0	0	11.4	5.2		1	Dogs	Dogs	0.06	2454
1842	1786	1996	14	196	NA	Forest	NA	Northern	Male	1	2.5	2					1	Dogs	Dogs	0.06	2454
1843	1790	1996	14	196	NA	Forest	NA	Northern	Male	1	4.5	4					NA	NA	NA	0.06	2454
1844	1795	1996	14	196	NA	Forest	NA	Northern	Male	1	2.5	2		26.6	12.1		1	Dogs	Dogs	0.06	2454
1845	1797	1996	14	196	NA	Taylor	NA	Northern	Male	1	3.5	3					NA	NA	Other	0.06	2454
1847	1807	1996	14	196	NA	Lincoln	NA	Northern	Female	0	4.5	4	3	25	11.3		NA	NA	Other	0.06	2454
1848	1808	1996	14	196	NA	Price	NA	Northern	Female	0	2.5	2	3				0	Trapped	Trapped	0.06	2454
1849	1810	1996	14	196	NA	Oneida	NA	Northern	Male	1	1.5	1		24.2	11		NA	NA	Other	0.06	2454
1850	1812	1996	14	196	NA	Lincoln	NA	Northern	Male	1	0.5	0					0	Trapped	Trapped	0.06	2454
1851	1818	1996	14	196	NA	Price	NA	Northern	Female	0	0.5	0	0	13.1	5.9		1	Dogs	Dogs	0.06	2454
1852	1849	1996	14	196	NA	Price	NA	Northern	Female	0	0.5	0	0				NA	NA	Other	0.06	2454
1853	1852	1996	14	196	NA	Price	NA	Northern	Female	0	6.5	6	0	9.5	4.3		1	Dogs	Dogs	0.06	2454
1854	1854	1996	14	196	NA	Price	NA	Northern	Female	0	NA	NA	3				NA	NA	NA	0.06	2454
1855	1830	1996	14	196	NA	Iron	NA	Northern	Female	0	2.5	2	4	15.5	7		0	Trapped	Trapped	0.06	2454
1856	1856	1997	15	225	NA	Oneida	NA	Northern	Male	1	1.5	1		28.3	12.8		NA	NA	NA	0.1103	2649
1857	1857	1997	15	225	NA	Forest	NA	Northern	Female	0	9.5	9	4	22.6	10.3		NA	NA	NA	0.1103	2649
1858	1858	1997	15	225	NA	Oneida	NA	Northern	Female	0	2.5	2	3	16.4	7.4		NA	NA	NA	0.1103	2649
1859	1859	1997	15	225	NA	Sawyer	NA	Northern	Female	0	3.5	3	0				NA	NA	NA	0.1103	2649
1860	1860	1997	15	225	NA	Forest	NA	Northern	Female	0	4.5	4	5	19.5	8.8		NA	NA	NA	0.1103	2649
1861	1861	1997	15	225	NA	Forest	NA	Northern	Male	1	2.5	2		23.4	10.6		NA	NA	NA	0.1103	2649
1862	1862	1997	15	225	NA	Oneida	NA	Northern	Male	1	2.5	2		24.7	11.2		NA	NA	NA	0.1103	2649
1863	1863	1997	15	225	NA	Langlade	NA	Northern	Female	0	3.5	3	4	21.4	9.7		NA	NA	NA	0.1103	2649
1864	1864	1997	15	225	NA	Oneida	NA	Northern	Male	1	0.5	0		11.8	5.4		NA	NA	NA	0.1103	2649
1865	1865	1997	15	225	NA	Langlade	NA	Northern	Male	1	0.5	0		13.7	6.2		NA	NA	NA	0.1103	2649
1866	1866	1997	15	225	NA	Oneida	NA	Northern	Female	0	2.5	2	4	18.5	8.4		NA	NA	NA	0.1103	2649
1867	1867	1997	15	225	NA	Oneida	NA	Northern	Male	1	4.5	4		32	14.5		NA	NA	NA	0.1103	2649
1868	1868	1997	15	225	NA	Florence	NA	Northern	Male	1	4.5	4		28.7	13		NA	NA	NA	0.1103	2649
1869	1869	1997	15	225	NA	Price	NA	Northern	Male	1	2.5	2		28.6	13		NA	NA	NA	0.1103	2649
1870	1870	1997	15	225	NA	Florence	NA	Northern	Female	0	1.5	1	0	16.9	7.7		NA	NA	NA	0.1103	2649
1871	1871	1997	15	225	NA	Forest	NA	Northern	Female	0	0.5	0	0	8	3.6		NA	NA	NA	0.1103	2649
1872	1872	1997	15	225	NA	Price	NA	Northern	Male	1	2.5	2		24.5	11.1		NA	NA	NA	0.1103	2649
1873	1873	1997	15	225	NA	Lincoln	NA	Northern	Female	0	4.5	4	3	22	10		NA	NA	NA	0.1103	2649
1874	1874	1997	15	225	NA	Unknown	NA	Northern	Female	0	7.5	7	0	20.8	9.4		NA	NA	NA	0.1103	2649
1875	1875	1997	15	225	NA	Lincoln	NA	Northern	Female	0	0.5	0	0				NA	NA	NA	0.1103	2649
1876	1876	1997	15	225	NA	Lincoln	NA	Northern	Female	0	0.5	0	0	13	5.9		NA	NA	NA	0.1103	2649
1877	1877	1997	15	225	NA	Unknown	NA	Northern	Male	1	1.5	1		20.5	9.3		NA	NA	NA	0.1103	2649
1878	1878	1997	15	225	NA	Lincoln	NA	Northern	Male	1	4.5	4		26.6	12.1		NA	NA	NA	0.1103	2649
1879	1879	1997	15	225	NA	Unknown	NA	Northern	Male	1	2.5	2		24.3	11		NA	NA	NA	0.1103	2649
1880	1880	1997	15	225	NA	Unknown	NA	Northern	Male	1	5.5	5		26.5	12		NA	NA	NA	0.1103	2649
1881	1881	1997	15	225	NA	Lincoln	NA	Northern	Female	0	0.5	0	0	8.5	3.9		NA	NA	NA	0.1103	2649
1882	1882	1997	15	225	NA	Oneida	NA	Northern	Male	1	0.5	0		12.4	5.6		NA	NA	NA	0.1103	2649
1883	1883	1997	15	225	NA	Taylor	NA	Northern	Male	1	0.5	0		13.5	6.1		NA	NA	NA	0.1103	2649
1884	1884	1997	15	225	NA	Oneida	NA	Northern	Female	0	0.5	0	0	13.8	6.3		NA	NA	NA	0.1103	2649
1885	1885	1997	15	225	NA	Oneida	NA	Northern	Female	0	1.5	1	2	14.4	6.5		NA	NA	NA	0.1103	2649
1886	1886	1997	15	225	NA	Vilas	NA	Northern	Female	0	0.5	0	0	10.2	4.6		NA	NA	NA	0.1103	2649
1887	1887	1997	15	225	NA	Sawyer	NA	Northern	Female	0	5.5	5	2	15.8	7.2		NA	NA	NA	0.1103	2649
1888	1888	1997	15	225	NA	Ashland	NA	Northern	Female	0	1.5	1					NA	NA	NA	0.1103	2649
1889	1889	1997	15	225	NA	Marinette	NA	Northern	Male	1	2.5	2		21	9.5		NA	NA	NA	0.1103	2649
1890	1890	1997	15	225	NA	Oconto	NA	Northern	Female	0	1.5	1	0	15.3	6.9		NA	NA	NA	0.1103	2649
1891	1891	1997	15	225	NA	Oconto	NA	Northern	Female	0	5.5	5	3	17.5	7.9		NA	NA	NA	0.1103	2649
1892	1892	1997	15	225	NA	Price	NA	Northern	Male	1	2.5	2		23.6	10.7		NA	NA	NA	0.1103	2649
1893	1893	1997	15	225	NA	Price	NA	Northern	Female	0	2.5	2	0	14.7	6.7		NA	NA	NA	0.1103	2649
1894	1894	1997	15	225	NA	Marinette	NA	Northern	Male	1	3.5	3		28.3	12.8		NA	NA	NA	0.1103	2649
1895	1895	1997	15	225	NA	Unknown	NA	Northern	Male	1	6.5	6		27.8	12.6		NA	NA	NA	0.1103	2649
1896	1896	1997	15	225	NA	Marinette	NA	Northern	Female	0	2.5	2	3	13.7	6.2		NA	NA	NA	0.1103	2649
1897	1897	1997	15	225	NA	Unknown	NA	Northern	Male	1	2.5	2		21.5	9.8		NA	NA	NA	0.1103	2649
1898	1898	1997	15	225	NA	Forest	NA	Northern	Male	1	0.5	0		11.2	5.1		NA	NA	NA	0.1103	2649
1899	1899	1997	15	225	NA	Price	NA	Northern	Female	0	2.5	2	4	15	6.8		NA	NA	NA	0.1103	2649
1900	1900	1997	15	225	NA	Oconto	NA	Northern	Female	0	0.5	0	0	11.2	5.1		NA	NA	NA	0.1103	2649
1901	1901	1997	15	225	NA	Forest	NA	Northern	Male	1	0.5	0		13.2	6		NA	NA	NA	0.1103	2649
1902	1902	1997	15	225	NA	Oneida	NA	Northern	Male	1	2.5	2		24.4	11.1		NA	NA	NA	0.1103	2649
1903	1903	1997	15	225	NA	Langlade	NA	Northern	Female	0	1.5	1	3	14	6.4		NA	NA	NA	0.1103	2649
1904	1904	1997	15	225	NA	Forest	NA	Northern	Female	0	2.5	2	4	16.8	7.6		NA	NA	NA	0.1103	2649
1905	1905	1997	15	225	NA	Forest	NA	Northern	Male	1	0.5	0		15.5	7		NA	NA	NA	0.1103	2649
1906	1906	1997	15	225	NA	Price	NA	Northern	Male	1	6.5	6		29	13.2		NA	NA	NA	0.1103	2649
1907	1907	1997	15	225	NA	Marinette	NA	Northern	Male	1	1.5	1		22.8	10.3		NA	NA	NA	0.1103	2649
1908	1908	1997	15	225	NA	Forest	NA	Northern	Male	1	1.5	1		21.6	9.8		NA	NA	NA	0.1103	2649
1909	1909	1997	15	225	NA	Oconto	NA	Northern	Male	1	1.5	1		29	13.2		NA	NA	NA	0.1103	2649
1910	1910	1997	15	225	NA	Marinette	NA	Northern	Female	0	4.5	4	3	20	9.1		NA	NA	NA	0.1103	2649
1911	1911	1997	15	225	NA	Marinette	NA	Northern	Male	1	7.5	7		24.5	11.1		NA	NA	NA	0.1103	2649
1912	1912	1997	15	225	NA	Oconto	NA	Northern	Female	0	3.5	3	4	19.5	8.8		NA	NA	NA	0.1103	2649
1913	1913	1997	15	225	NA	Langlade	NA	Northern	Female	0	2.5	2	3	20.5	9.3		NA	NA	NA	0.1103	2649
1914	1914	1997	15	225	NA	Forest	NA	Northern	Female	0	3.5	3	2	17.8	8.1		NA	NA	NA	0.1103	2649
1915	1915	1997	15	225	NA	Langlade	NA	Northern	Female	0	3.5	3	2	22.6	10.3		NA	NA	NA	0.1103	2649
1916	1916	1997	15	225	NA	Marinette	NA	Northern	Female	0	4.5	4	4	22.5	10.2		NA	NA	NA	0.1103	2649
1917	1917	1997	15	225	NA	Florence	NA	Northern	Female	0	1.5	1	0	13.8	6.3		NA	NA	NA	0.1103	2649
1918	1918	1997	15	225	NA	Price	NA	Northern	Male	1	2.5	2		26	11.8		NA	NA	NA	0.1103	2649
1919	1919	1997	15	225	NA	Unknown	NA	Northern	Male	1	5.5	5		23.6	10.7		NA	NA	NA	0.1103	2649
1920	1920	1997	15	225	NA	Marinette	NA	Northern	Male	1	5.5	5		29	13.2		NA	NA	NA	0.1103	2649
1921	1921	1997	15	225	NA	Marinette	NA	Northern	Male	1	2.5	2		29.4	13.3		NA	NA	NA	0.1103	2649
1922	1922	1997	15	225	NA	Unknown	NA	Northern	Male	1	3.5	3		23	10.4		NA	NA	NA	0.1103	2649
1923	1923	1997	15	225	NA	Chippewa	NA	Northern	Male	1	0.5	0		7.5	3.4		NA	NA	NA	0.1103	2649
1924	1924	1997	15	225	NA	Chippewa	NA	Northern	Male	1	0.5	0		7.6	3.4		NA	NA	NA	0.1103	2649
1925	1925	1997	15	225	NA	Chippewa	NA	Northern	Male	1	0.5	0		9.6	4.4		NA	NA	NA	0.1103	2649
1926	1926	1997	15	225	NA	Forest	NA	Northern	Male	1	4.5	4		26.5	12		NA	NA	NA	0.1103	2649
1927	1927	1997	15	225	NA	Chippewa	NA	Northern	Female	0	4.5	4	3	18.4	8.3		NA	NA	NA	0.1103	2649
1928	1928	1997	15	225	NA	Price	NA	Northern	Male	1	2.5	2		24.3	11		NA	NA	NA	0.1103	2649
1929	1929	1997	15	225	NA	Marinette	NA	Northern	Male	1	0.5	0		7.6	3.4		NA	NA	NA	0.1103	2649
1930	1930	1997	15	225	NA	Marinette	NA	Northern	Female	0	2.5	2	3	18	8.2		NA	NA	NA	0.1103	2649
1931	1931	1997	15	225	NA	Forest	NA	Northern	Female	0	4.5	4	3	17.5	7.9		NA	NA	NA	0.1103	2649
1932	1932	1997	15	225	NA	Oneida	NA	Northern	Female	0	2.5	2	0	20.6	9.3		NA	NA	NA	0.1103	2649
1933	1933	1997	15	225	NA	Unknown	NA	Northern	Male	1	5.5	5		28	12.7		NA	NA	NA	0.1103	2649
1934	1934	1997	15	225	NA	Unknown	NA	Northern	Male	1	1.5	1		24.3	11		NA	NA	NA	0.1103	2649
1935	1935	1997	15	225	NA	Unknown	NA	Northern	Male	1	2.5	2		23.6	10.7		NA	NA	NA	0.1103	2649
1936	1936	1997	15	225	NA	Unknown	NA	Northern	Female	0	1.5	1	0	19.3	8.8		NA	NA	NA	0.1103	2649
1937	1937	1997	15	225	NA	Oconto	NA	Northern	Female	0	3.5	3	4	17.7	8		NA	NA	NA	0.1103	2649
1938	1938	1997	15	225	NA	Price	NA	Northern	Female	0	5.5	5		21	9.5		NA	NA	NA	0.1103	2649
1939	1939	1997	15	225	NA	Unknown	NA	Northern	Female	0	0.5	0	0	10.4	4.7		NA	NA	NA	0.1103	2649
1940	1940	1997	15	225	NA	Unknown	NA	Northern	Female	0	0.5	0	0	10.1	4.6		NA	NA	NA	0.1103	2649
1941	1941	1997	15	225	NA	Vilas	NA	Northern	Female	0	0.5	0	0	12.5	5.7		NA	NA	NA	0.1103	2649
1942	1942	1997	15	225	NA	Oconto	NA	Northern	Male	1	2.5	2		26.5	12		NA	NA	NA	0.1103	2649
1943	1943	1997	15	225	NA	Langlade	NA	Northern	Female	0	1.5	1	0	14.4	6.5		NA	NA	NA	0.1103	2649
1944	1944	1997	15	225	NA	Taylor	NA	Northern	Male	1	2.5	2		26.8	12.2		NA	NA	NA	0.1103	2649
1945	1945	1997	15	225	NA	Rusk	NA	Northern	Male	1	0.5	0		12.4	5.6		NA	NA	NA	0.1103	2649
1946	1946	1997	15	225	NA	Chippewa	NA	Northern	Male	1	1.5	1		24.4	11.1		NA	NA	NA	0.1103	2649
1947	1947	1997	15	225	NA	Price	NA	Northern	Female	0	NA	NA	4	18.7	8.5		NA	NA	NA	0.1103	2649
1948	1948	1997	15	225	NA	Unknown	NA	Northern	Male	1	3.5	3		30	13.6		NA	NA	NA	0.1103	2649
1949	1949	1997	15	225	NA	Unknown	NA	Northern	Male	1	0.5	0		11.3	5.1		NA	NA	NA	0.1103	2649
1950	1950	1997	15	225	NA	Price	NA	Northern	Male	1	1.5	1		23.1	10.5		NA	NA	NA	0.1103	2649
1951	1951	1997	15	225	NA	Ashland	NA	Northern	Male	1	3.5	3		28	12.7		NA	NA	NA	0.1103	2649
1952	1952	1997	15	225	NA	Vilas	NA	Northern	Male	1	2.5	2		25	11.3		NA	NA	NA	0.1103	2649
1953	1953	1997	15	225	NA	Ashland	NA	Northern	Female	0	0.5	0	0	12	5.4		NA	NA	NA	0.1103	2649
1954	1954	1997	15	225	NA	Lincoln	NA	Northern	Female	0	1.5	1	0	13	5.9		NA	NA	NA	0.1103	2649
1955	1955	1997	15	225	NA	Ashland	NA	Northern	Female	0	6.5	6	4	22.5	10.2		NA	NA	NA	0.1103	2649
1956	1956	1997	15	225	NA	Rusk	NA	Northern	Male	1	1.5	1		28	12.7		NA	NA	NA	0.1103	2649
1957	1957	1997	15	225	NA	Douglas	NA	Northern	Female	0	8.5	8	0	18	8.2		NA	NA	NA	0.1103	2649
1958	1958	1997	15	225	NA	Ashland	NA	Northern	Male	1	0.5	0		16.5	7.5		NA	NA	NA	0.1103	2649
1959	1959	1997	15	225	NA	Vilas	NA	Northern	Male	1	3.5	3		28	12.7		NA	NA	NA	0.1103	2649
1960	1960	1997	15	225	NA	Sawyer	NA	Northern	Male	1	0.5	0		11.8	5.4		NA	NA	NA	0.1103	2649
1961	1961	1997	15	225	NA	Douglas	NA	Northern	Male	1	2.5	2		26.5	12		NA	NA	NA	0.1103	2649
1962	1962	1997	15	225	NA	Ashland	NA	Northern	Female	0	3.5	3	3	16.7	7.6		NA	NA	NA	0.1103	2649
1963	1963	1997	15	225	NA	Washburn	NA	Northern	Female	0	0.5	0	0	11.6	5.3		NA	NA	NA	0.1103	2649
1964	1964	1997	15	225	NA	Douglas	NA	Northern	Female	0	4.5	4	3	19.2	8.7		NA	NA	NA	0.1103	2649
1965	1965	1997	15	225	NA	Sawyer	NA	Northern	Male	1	0.5	0		7.9	3.6		NA	NA	NA	0.1103	2649
1966	1966	1997	15	225	NA	Ashland	NA	Northern	Male	1	6.5	6		24.3	11		NA	NA	NA	0.1103	2649
1967	1967	1997	15	225	NA	Ashland	NA	Northern	Male	1	2.5	2		25.5	11.6		NA	NA	NA	0.1103	2649
1968	1968	1997	15	225	NA	Rusk	NA	Northern	Male	1	2.5	2		18.5	8.4		NA	NA	NA	0.1103	2649
1969	1969	1997	15	225	NA	Rusk	NA	Northern	Male	1	7.5	7		19.2	8.7		NA	NA	NA	0.1103	2649
1970	1970	1997	15	225	NA	Burnett	NA	Northern	Female	0	1.5	1	3	23.5	10.7		NA	NA	NA	0.1103	2649
1971	1971	1997	15	225	NA	Douglas	NA	Northern	Female	0	4.5	4		18.4	8.3		NA	NA	NA	0.1103	2649
1972	1972	1997	15	225	NA	Ashland	NA	Northern	Male	1	2.5	2		22.6	10.3		NA	NA	NA	0.1103	2649
1973	1973	1997	15	225	NA	Ashland	NA	Northern	Male	1	7.5	7		23.8	10.8		NA	NA	NA	0.1103	2649
1974	1974	1997	15	225	NA	Ashland	NA	Northern	Male	1	0.5	0		12.5	5.7		NA	NA	NA	0.1103	2649
1975	1975	1997	15	225	NA	Langlade	NA	Northern	Female	0	3.5	3	3	19	8.6		NA	NA	NA	0.1103	2649
1976	1976	1997	15	225	NA	Langlade	NA	Northern	Female	0	0.5	0	0				NA	NA	NA	0.1103	2649
1977	1977	1997	15	225	NA	Oneida	NA	Northern	Female	0	2.5	2	3	14.8	6.7		NA	NA	NA	0.1103	2649
1978	1978	1997	15	225	NA	Forest	NA	Northern	Male	1	0.5	0		9	4.1		NA	NA	NA	0.1103	2649
1979	1979	1997	15	225	NA	Iron	NA	Northern	Female	0	2.5	2	3	19.2	8.7		NA	NA	NA	0.1103	2649
1980	1980	1997	15	225	NA	Sawyer	NA	Northern	Female	0	1.5	1	0	18	8.2		NA	NA	NA	0.1103	2649
1981	1981	1997	15	225	NA	Unknown	NA	Northern	Male	1	0.5	0		15.2	6.9		NA	NA	NA	0.1103	2649
1982	1982	1997	15	225	NA	Unknown	NA	Northern	Female	0	7.5	7	4				NA	NA	NA	0.1103	2649
1983	1983	1997	15	225	NA	Unknown	NA	Northern	Female	0	3.5	3	4				NA	NA	NA	0.1103	2649
1984	1984	1997	15	225	NA	Rusk	NA	Northern	Male	1	1.5	1		14.5	6.6		NA	NA	NA	0.1103	2649
1985	1985	1997	15	225	NA	Sawyer	NA	Northern	Female	0	3.5	3	2	16.4	7.4		NA	NA	NA	0.1103	2649
1986	1986	1997	15	225	NA	Iron	NA	Northern	Male	1	1.5	1		23	10.4		NA	NA	NA	0.1103	2649
1987	1987	1997	15	225	NA	Iron	NA	Northern	Female	0	7.5	7	4	27	12.2		NA	NA	NA	0.1103	2649
1988	1988	1997	15	225	NA	Bayfield	NA	Northern	Female	0	6.5	6	3	22.5	10.2		NA	NA	NA	0.1103	2649
1989	1989	1997	15	225	NA	Douglas	NA	Northern	Female	0	8.5	8	2	20	9.1		NA	NA	NA	0.1103	2649
1990	1990	1997	15	225	NA	Douglas	NA	Northern	Male	1	4.5	4		23	10.4		NA	NA	NA	0.1103	2649
1991	1991	1997	15	225	NA	Bayfield	NA	Northern	Female	0	1.5	1	2	16.8	7.6		NA	NA	NA	0.1103	2649
1992	1992	1997	15	225	NA	Unknown	NA	Northern	Male	1	1.5	1		22	10		NA	NA	NA	0.1103	2649
1993	1993	1997	15	225	NA	Douglas	NA	Northern	Male	1	1.5	1		19.5	8.8		NA	NA	NA	0.1103	2649
1994	1994	1997	15	225	NA	Iron	NA	Northern	Female	0	4.5	4	3	22.2	10.1		NA	NA	NA	0.1103	2649
1995	1995	1997	15	225	NA	Douglas	NA	Northern	Female	0	1.5	1	2				NA	NA	NA	0.1103	2649
1996	2005	1998	16	256	NA	Unknown	NA	Northern	Male	1	1.5	1					NA	NA	NA	0.0861	2653
1997	2042	1998	16	256	NA	Unknown	NA	Northern	Male	1	1.5	1		21	9.5		NA	NA	NA	0.0861	2653
1998	2049	1998	16	256	NA	Unknown	NA	Northern	Female	0	2.5	2	0	18.5	8.4		NA	NA	NA	0.0861	2653
1999	2058	1998	16	256	NA	Unknown	NA	Northern	Male	1	3.5	3		23.2	10.5		NA	NA	NA	0.0861	2653
2000	2067	1998	16	256	NA	Unknown	NA	Northern	Male	1	1.5	1		25.5	11.6		NA	NA	NA	0.0861	2653
[truncated: 3,755 more rows]
